# Supplementary material for: Quantitative iTRAQ LC-MS/MS Proteomics Reveals the Proteome Profiles of DF-1 Cells after Infection with Subgroup J Avian Leukosis Virus
Source: Hindawi journal article supplement (doi:10.1155/2015/395307), 2015-01-01
Supplement: f1 [file 395307.f1.pdf]

List of differentially expressed proteins identified by iTRAQ analysis of DF-1 cells infected with ALV-J.

| Accession no. | Protein name                                                                                | Protein score | Fold change in expression | Protein MW | Protein PI |
|---------------|---------------------------------------------------------------------------------------------|---------------|---------------------------|------------|------------|
| O73612        | Ephrin-B1 OS=Gallus gallus GN=EFNB1 PE=2 SV=1 - [EFNB1_CHICK]                               | 34.98         | 1.667                     | 36.8       | 8.87       |
| F1P187        | Gephyrin (Fragment) OS=Gallus gallus GN=GPHN PE=4 SV=2 - [F1P187_CHICK]                     | 0.00          | 1.560                     | 77.4       | 5.38       |
| P12274        | Non-histone chromosomal protein HMG-14B OS=Gallus gallus GN=HMG14 PE=3 SV=2 - [HMG14_CHICK] | 0.00          | 1.473                     | 11.2       | 9.63       |
| E1BTX9        | Serine/threonine-protein phosphatase OS=Gallus gallus PE=3 SV=2 - [E1BTX9_CHICK]            | 39.24         | 1.429                     | 73.4       | 8.34       |
| P08286        | Histone H1.10 OS=Gallus gallus PE=1 SV=3 - [H110_CHICK]                                     | 476.50        | 1.315                     | 22.0       | 11.18      |
| E1C281        | PHD finger protein 6 OS=Gallus gallus GN=PHF6 PE=4 SV=1 - [E1C281_CHICK]                    | 0.00          | 1.281                     | 41.0       | 8.62       |
| Q5ZJ02        | DBIRD complex subunit ZNF326 OS=Gallus gallus GN=ZNF326 PE=2 SV=3 - [ZNF326_CHICK]          | 45.04         | 1.280                     | 63.5       | 5.78       |
| Q5ZIK4        | Protein yippee-like OS=Gallus gallus GN=YPEL5 PE=2 SV=1 - [Q5ZIK4_CHICK]                    | 0.00          | 1.276                     | 13.8       | 7.31       |
| Q5F3J5        | Proteasome activator complex subunit 3 OS=Gallus gallus GN=PSME3 PE=1 SV=1 - [PSME3_CHICK]  | 143.05        | 1.274                     | 29.5       | 6.19       |
| Q5F3Z5        | DnaJ homolog subfamily B member 6 OS=Gallus gallus GN=DNAJB6 PE=2 SV=1 - [DNAJB6_CHICK]     | 0.00          | 1.263                     | 36.7       | 8.84       |

|        |                                                                                                       |       |       |       |      |
|--------|-------------------------------------------------------------------------------------------------------|-------|-------|-------|------|
| F1NB51 | Zinc finger E-box-binding homeobox 1 OS=Gallus gallus GN=ZEB1 PE=3 SV=1 - [F1NB51_CHICK]              | 41.75 | 1.258 | 123.1 | 5.02 |
| F1NLA7 | Zinc finger CCCH domain-containing protein 11A OS=Gallus gallus GN=ZC3H11A PE=4 SV=1 - [F1NLA7_CHICK] | 43.83 | 1.254 | 79.0  | 8.16 |
| F1P5W3 | Ephrin-B1 (Fragment) OS=Gallus gallus GN=EFNB1 PE=3 SV=2 - [F1P5W3_CHICK]                             | 34.98 | 1.249 | 32.7  | 8.46 |
| F1NXG2 | WW domain-binding protein 4 (Fragment) OS=Gallus gallus GN=WBP4 PE=4 SV=2 - [F1NXG2_CHICK]            | 0.00  | 1.235 | 45.2  | 5.73 |
| P08267 | Ferritin heavy chain OS=Gallus gallus GN=FTH PE=2 SV=2 - [FRIH_CHICK]                                 | 65.41 | 1.226 | 21.1  | 6.21 |
| Q6K1L7 | Probable RNA-binding protein EIF1AD OS=Gallus gallus GN=eif1ad PE=2 SV=1 - [EIF1A_CHICK]              | 0.00  | 1.210 | 21.2  | 4.79 |
| F1NEY0 | Syndecan (Fragment) OS=Gallus gallus GN=CPQ PE=3 SV=2 - [F1NEY0_CHICK]                                | 45.65 | 1.208 | 19.9  | 4.70 |
| F1NMD7 | Pre-mRNA-splicing factor RBM22 OS=Gallus gallus GN=RBM22 PE=4 SV=1 - [F1NMD7_CHICK]                   | 21.07 | 1.205 | 46.7  | 8.54 |
| O93481 | Chromobox protein (CHCB2) OS=Gallus gallus GN=CBX3 PE=2 SV=1 - [O93481_CHICK]                         | 0.00  | 1.190 | 19.8  | 5.12 |
| F1NFJ0 | DNA replication licensing factor MCM3 OS=Gallus gallus GN=MCM3 PE=3 SV=1 - [F1NFJ0_CHICK]             | 46.00 | 1.188 | 91.3  | 5.74 |
| E1C9E9 | DCN1-like protein OS=Gallus gallus GN=DCUN1D5 PE=4 SV=2 - [E1C9E9_CHICK]                              | 0.00  | 1.183 | 27.2  | 5.77 |
| F1NAQ1 | Vascular endothelial growth factor A OS=Gallus gallus GN=VEGFA PE=3 SV=1 - [F1NAQ1_CHICK]             | 0.00  | 1.179 | 25.1  | 9.10 |
| F1NLU6 | Enhancer of mRNA-decapping protein 3 OS=Gallus gallus GN=EDC3 PE=4 SV=1 - [F1NLU6_CHICK]              | 49.54 | 1.175 | 56.0  | 7.17 |
| P16527 | Myristoylated alanine-rich C-kinase substrate OS=Gallus gallus GN=MARCKS PE=1 SV=2 -                  | 30.67 | 1.174 | 27.7  | 4.44 |

## [MARCS\_CHICK]

|        |                                                                                                       |        |       |      |      |
|--------|-------------------------------------------------------------------------------------------------------|--------|-------|------|------|
| Q5ZMC9 | Nuclear distribution protein nudE homolog 1 OS=Gallus gallus GN=NDE1 PE=2 SV=1 - [NDE1_CHICK]         | 0.00   | 1.173 | 39.5 | 5.11 |
| Q5ZII6 | Protein kish-A OS=Gallus gallus GN=TMEM167A PE=3 SV=1 - [KISHA_CHICK]                                 | 27.01  | 1.173 | 8.0  | 8.92 |
| Q5ZIL9 | KIF1-binding protein homolog OS=Gallus gallus GN=kbp PE=2 SV=1 - [KBP_CHICK]                          | 0.00   | 1.167 | 69.0 | 5.21 |
| F1NFP5 | Arginine--tRNA ligase, cytoplasmic OS=Gallus gallus GN=RARS PE=3 SV=2 - [F1NFP5_CHICK]                | 184.95 | 1.158 | 75.4 | 6.98 |
| E1C4V1 | ATP synthase-coupling factor 6, mitochondrial OS=Gallus gallus GN=ATP5J PE=3 SV=2 -<br>[E1C4V1_CHICK] | 111.05 | 1.157 | 12.5 | 9.33 |
| Q90595 | Transcription factor MafF OS=Gallus gallus GN=MAFF PE=2 SV=1 - [MAFF_CHICK]                           | 37.09  | 1.155 | 16.6 | 9.74 |
| R4GJF8 | TAR DNA-binding protein 43 OS=Gallus gallus GN=TARDBP PE=4 SV=1 - [R4GJF8_CHICK]                      | 131.97 | 1.155 | 42.2 | 6.19 |
| Q6B7Z6 | Polymyositis/scleroderma autoantigen 1 OS=Gallus gallus GN=EXOSC9 PE=2 SV=1 - [Q6B7Z6_CHICK]          | 0.00   | 1.151 | 49.3 | 5.54 |
| E1C7X8 | S-adenosylmethionine synthase OS=Gallus gallus GN=LOC427292 PE=3 SV=1 - [E1C7X8_CHICK]                | 14.44  | 1.150 | 43.2 | 6.62 |
| Q5ZLD4 | Transmembrane protein 11, mitochondrial OS=Gallus gallus GN=TMEM11 PE=2 SV=1 - [TMM11_CHICK]          | 46.41  | 1.149 | 21.7 | 7.36 |
| R4GHT3 | Uridine-cytidine kinase (Fragment) OS=Gallus gallus GN=LOC776992 PE=3 SV=1 - [R4GHT3_CHICK]           | 0.00   | 1.148 | 49.7 | 7.03 |
| Q9I8G9 | Histone-binding protein RBBP7 OS=Gallus gallus GN=RBBP7 PE=1 SV=1 - [RBBP7_CHICK]                     | 111.20 | 1.146 | 47.7 | 4.94 |
| F1NT19 | Superoxide dismutase OS=Gallus gallus GN=SOD2 PE=3 SV=1 - [F1NT19_CHICK]                              | 45.73  | 1.146 | 24.8 | 8.41 |

|        |                                                                                                                            |         |       |       |      |
|--------|----------------------------------------------------------------------------------------------------------------------------|---------|-------|-------|------|
| F1P578 | Mitochondrial Rho GTPase OS=Gallus gallus GN=RHOT2 PE=3 SV=2 - [F1P578_CHICK]                                              | 79.27   | 1.139 | 69.1  | 5.24 |
| F1NA55 | Eukaryotic translation initiation factor 2A OS=Gallus gallus GN=EIF2A PE=4 SV=2 - [F1NA55_CHICK]                           | 66.41   | 1.138 | 62.7  | 8.79 |
| Q5ZKR5 | Nuclear cap-binding protein subunit 2 OS=Gallus gallus GN=NCBP2 PE=2 SV=1 - [NCBP2_CHICK]                                  | 0.00    | 1.137 | 19.3  | 9.00 |
| Q5ZIR9 | E3 ubiquitin-protein ligase RNF185 OS=Gallus gallus GN=RNF185 PE=2 SV=1 - [RNF185_CHICK]                                   | 23.79   | 1.134 | 20.8  | 7.62 |
| Q5ZHN4 | Protein XRP2 OS=Gallus gallus GN=RP2 PE=2 SV=3 - [XRP2_CHICK]                                                              | 19.86   | 1.132 | 39.7  | 5.29 |
| P13127 | F-actin-capping protein subunit alpha-1 OS=Gallus gallus GN=CAPZA1 PE=1 SV=1 - [CAZA1_CHICK]                               | 44.43   | 1.132 | 32.9  | 5.69 |
| P18944 | Cytochrome c oxidase subunit 2 OS=Gallus gallus GN=MT-CO2 PE=3 SV=1 - [COX2_CHICK]                                         | 0.00    | 1.132 | 25.6  | 4.72 |
| F1NCR4 | Ubiquitin carboxyl-terminal hydrolase OS=Gallus gallus PE=3 SV=2 - [F1NCR4_CHICK]                                          | 69.75   | 1.131 | 130.2 | 5.21 |
| Q800L1 | Surfeit locus protein 1 OS=Gallus gallus GN=SURF1 PE=3 SV=1 - [SURF1_CHICK]                                                | 47.36   | 1.128 | 35.2  | 9.74 |
| Q5ZKJ0 | Cleft lip and palate transmembrane protein 1-like protein OS=Gallus gallus GN=CLPTM1L PE=2 SV=1 - [CLP1L_CHICK]            | 0.00    | 1.128 | 61.6  | 8.97 |
| Q90593 | 78 kDa glucose-regulated protein OS=Gallus gallus GN=HSPA5 PE=1 SV=1 - [GRP78_CHICK]                                       | 3036.20 | 1.126 | 72.0  | 5.22 |
| F1NNS3 | Protein HIRA (Fragment) OS=Gallus gallus GN=HIRA PE=4 SV=1 - [F1NNS3_CHICK]                                                | 65.23   | 1.124 | 110.6 | 7.88 |
| Q5ZM57 | Very-long-chain (3R)-3-hydroxyacyl-[acyl-carrier protein] dehydratase OS=Gallus gallus GN=PTPLAD1 PE=2 SV=1 - [HACD_CHICK] | 17.88   | 1.122 | 42.8  | 9.06 |

|          |                                                                                                                     |         |       |       |       |
|----------|---------------------------------------------------------------------------------------------------------------------|---------|-------|-------|-------|
| P56517   | Histone deacetylase 1 OS=Gallus gallus GN=HDAC1 PE=2 SV=1 - [HDAC1_CHICK]                                           | 51.95   | 1.121 | 54.9  | 5.49  |
| Q76LT9   | Transmembrane protein 258 OS=Gallus gallus GN=TMEM258 PE=3 SV=1 - [TM258_CHICK]                                     | 0.00    | 1.121 | 9.1   | 5.83  |
| F1NU71   | Mitochondrial import inner membrane translocase subunit TIM44 OS=Gallus gallus GN=TIMM44 PE=3 SV=2 - [F1NU71_CHICK] | 160.28  | 1.120 | 51.2  | 8.12  |
| Q98TQ8   | Connective tissue growth factor (Precursor) OS=Gallus gallus GN=CTGF PE=2 SV=1 - [Q98TQ8_CHICK]                     | 0.00    | 1.120 | 37.5  | 7.83  |
| F1NVA4   | Nucleophosmin (Fragment) OS=Gallus gallus GN=NPM1 PE=4 SV=2 - [F1NVA4_CHICK]                                        | 268.66  | 1.119 | 30.3  | 4.84  |
| R4GGG5   | Microfibrillar-associated protein 1 OS=Gallus gallus GN=MFAP1 PE=4 SV=1 - [R4GGG5_CHICK]                            | 37.12   | 1.118 | 51.9  | 4.97  |
| Q5ZJM2   | Tryptophan rich basic protein OS=Gallus gallus GN=WRB PE=2 SV=1 - [Q5ZJM2_CHICK]                                    | 0.00    | 1.116 | 14.4  | 9.83  |
| Q90640   | Chromosome-associated kinesin KIF4 OS=Gallus gallus GN=KIF4 PE=2 SV=1 - [KIF4_CHICK]                                | 41.66   | 1.116 | 138.8 | 6.52  |
| P04268-4 | Isoform 4 of Tropomyosin alpha-1 chain OS=Gallus gallus GN=TPM1 - [TPM1_CHICK]                                      | 328.58  | 1.115 | 32.9  | 4.78  |
| Q5ZMC0   | Endothelial differentiation-related factor 1 homolog OS=Gallus gallus GN=EDF1 PE=2 SV=1 - [EDF1_CHICK]              | 45.41   | 1.114 | 16.4  | 9.88  |
| P02263   | Histone H2A-IV OS=Gallus gallus PE=1 SV=2 - [H2A4_CHICK]                                                            | 1212.94 | 1.113 | 13.9  | 10.90 |
| F1P5R3   | Chromatin assembly factor 1 subunit A (Fragment) OS=Gallus gallus GN=CHAF1A PE=4 SV=1 - [F1P5R3_CHICK]              | 0.00    | 1.111 | 105.0 | 5.31  |

|          |                                                                                                             |        |       |       |       |
|----------|-------------------------------------------------------------------------------------------------------------|--------|-------|-------|-------|
| Q5ZL36   | Protrudin OS=Gallus gallus GN=ZFYVE27 PE=2 SV=1 - [ZFY27_CHICK]                                             | 35.29  | 1.111 | 44.9  | 5.45  |
| R4GHV2   | DCN1-like protein OS=Gallus gallus GN=DCUN1D2 PE=4 SV=1 - [R4GHV2_CHICK]                                    | 0.00   | 1.111 | 28.5  | 5.22  |
| Q5ZLC4   | Oxysterol-binding protein OS=Gallus gallus GN=OSBPL2 PE=2 SV=1 - [Q5ZLC4_CHICK]                             | 0.00   | 1.110 | 55.3  | 5.94  |
| P62167   | Neuronal calcium sensor 1 OS=Gallus gallus GN=NCS1 PE=1 SV=2 - [NCS1_CHICK]                                 | 0.00   | 1.110 | 21.9  | 4.83  |
| Q5ZHM2   | DNA-binding protein Ikaros OS=Gallus gallus GN=IK PE=2 SV=1 - [Q5ZHM2_CHICK]                                | 73.56  | 1.110 | 64.9  | 6.64  |
| Q2VB19-2 | Isoform 2 of Pumilio homolog 1 OS=Gallus gallus GN=PUM1 - [PUM1_CHICK]                                      | 40.66  | 1.109 | 116.3 | 6.84  |
| Q5ZLY8   | cAMP-regulated phosphoprotein 19 OS=Gallus gallus GN=ARPP19 PE=3 SV=3 - [ARP19_CHICK]                       | 0.00   | 1.109 | 12.3  | 9.09  |
| Q90VY6   | Survivin gamma OS=Gallus gallus GN=BIRC5 PE=4 SV=1 - [Q90VY6_CHICK]                                         | 0.00   | 1.109 | 6.7   | 9.20  |
| Q5ZME8   | WD40 repeat-containing protein SMU1 OS=Gallus gallus GN=SMU1 PE=2 SV=1 - [SMU1_CHICK]                       | 30.87  | 1.109 | 57.5  | 7.18  |
| F1NI57   | Pre-mRNA-splicing factor CWC22 homolog OS=Gallus gallus GN=CWC22 PE=4 SV=2 - [F1NI57_CHICK]                 | 0.00   | 1.109 | 108.9 | 7.58  |
| F1NFC0   | Nuclease-sensitive element-binding protein 1 (Fragment) OS=Gallus gallus GN=YBX1 PE=4 SV=2 - [F1NFC0_CHICK] | 168.61 | 1.108 | 31.1  | 9.98  |
| P30352   | Serine/arginine-rich splicing factor 2 OS=Gallus gallus GN=SRSF2 PE=2 SV=1 - [SRSF2_CHICK]                  | 19.02  | 1.108 | 25.5  | 11.85 |
| Q5ZL84   | Sigma non-opioid intracellular receptor 1 OS=Gallus gallus GN=SIGMAR1 PE=2 SV=1 - [SGMR1_CHICK]             | 27.57  | 1.107 | 24.6  | 6.33  |
| F1NLF2   | KH domain-containing, RNA-binding, signal transduction-associated protein 1 OS=Gallus gallus                | 70.38  | 1.107 | 46.5  | 8.81  |

|        |                                                                                                               |        |       |       |       |
|--------|---------------------------------------------------------------------------------------------------------------|--------|-------|-------|-------|
|        | GN=KHDRBS1 PE=4 SV=2 - [F1NLF2_CHICK]                                                                         |        |       |       |       |
| Q90596 | Transcription factor MafK OS=Gallus gallus GN=MAFK PE=2 SV=1 - [MAFK_CHICK]                                   | 49.33  | 1.107 | 17.5  | 9.89  |
| O13270 | TATA-box-binding protein OS=Gallus gallus GN=TBP PE=2 SV=1 - [TBP_CHICK]                                      | 66.94  | 1.107 | 33.1  | 9.79  |
| P18660 | 60S acidic ribosomal protein P1 OS=Gallus gallus GN=RPLP1 PE=3 SV=1 - [RLA1_CHICK]                            | 76.70  | 1.107 | 11.5  | 4.21  |
| Q9PUJ4 | Ephrin-B2 (Precursor) OS=Gallus gallus GN=EFNB2 PE=2 SV=1 - [Q9PUJ4_CHICK]                                    | 0.00   | 1.106 | 36.7  | 8.84  |
| Q98TF7 | 60S ribosomal protein L35 OS=Gallus gallus GN=RPL35 PE=2 SV=3 - [RL35_CHICK]                                  | 82.74  | 1.105 | 14.5  | 11.05 |
| F1N874 | Myocyte-specific enhancer factor 2A OS=Gallus gallus GN=MEF2A PE=3 SV=2 - [F1N874_CHICK]                      | 0.00   | 1.104 | 52.7  | 8.69  |
| F1NTH4 | Actin filament-associated protein 1 OS=Gallus gallus GN=AFAP1 PE=4 SV=1 - [F1NTH4_CHICK]                      | 42.00  | 1.104 | 81.1  | 8.63  |
| Q9I882 | Protein kinase C inhibitor OS=Gallus gallus GN=chPKCI PE=2 SV=1 - [Q9I882_CHICK]                              | 57.68  | 1.104 | 13.8  | 6.79  |
| P13216 | Adrenodoxin, mitochondrial (Fragment) OS=Gallus gallus GN=FDX1 PE=1 SV=1 - [ADX_CHICK]                        | 0.00   | 1.103 | 15.5  | 4.88  |
| E1C6F0 | U1 small nuclear ribonucleoprotein C OS=Gallus gallus GN=SNRPC PE=3 SV=1 - [RU1C_CHICK]                       | 89.22  | 1.102 | 17.4  | 9.67  |
| P67881 | Cytochrome c OS=Gallus gallus GN=CYC PE=1 SV=2 - [CYC_CHICK]                                                  | 232.97 | 1.102 | 11.7  | 9.50  |
| R4GHZ1 | Activating transcription factor 7-interacting protein 1 OS=Gallus gallus GN=ATF7IP PE=4 SV=1 - [R4GHZ1_CHICK] | 0.00   | 1.102 | 102.9 | 5.58  |
| Q5ZJA2 | Anamorsin OS=Gallus gallus GN=CIAPIN1 PE=2 SV=1 - [CPIN1_CHICK]                                               | 77.01  | 1.101 | 32.6  | 5.12  |

|        |                                                                                               |         |       |      |       |
|--------|-----------------------------------------------------------------------------------------------|---------|-------|------|-------|
| P62801 | Histone H4 OS=Gallus gallus GN=H4-I PE=1 SV=2 - [H4_CHICK]                                    | 1168.26 | 1.101 | 11.4 | 11.36 |
| E1C697 | Glutathione peroxidase OS=Gallus gallus GN=GPX7 PE=3 SV=1 - [E1C697_CHICK]                    | 66.32   | 1.100 | 23.5 | 7.96  |
| F1NWX6 | Protein VAC14 homolog OS=Gallus gallus GN=VAC14 PE=4 SV=1 - [F1NWX6_CHICK]                    | 51.78   | 1.100 | 87.8 | 6.30  |
| E1C5S5 | Protein kinase C delta type OS=Gallus gallus GN=PRKCD PE=3 SV=2 - [E1C5S5_CHICK]              | 0.00    | 1.099 | 78.4 | 8.12  |
| F1P3F9 | Glutamate dehydrogenase OS=Gallus gallus GN=GLUD1 PE=3 SV=2 - [F1P3F9_CHICK]                  | 405.85  | 1.099 | 47.6 | 8.18  |
| P49416 | Syndecan-4 OS=Gallus gallus GN=SDC4 PE=1 SV=1 - [SDC4_CHICK]                                  | 34.52   | 1.099 | 21.5 | 4.45  |
| P08636 | 40S ribosomal protein S17 OS=Gallus gallus GN=RPS17 PE=2 SV=3 - [RS17_CHICK]                  | 47.58   | 1.099 | 15.5 | 9.85  |
| F1NP38 | TBC1 domain family member 23 OS=Gallus gallus GN=TBC1D23 PE=4 SV=1 - [F1NP38_CHICK]           | 0.00    | 1.098 | 76.1 | 5.36  |
| Q5ZMW3 | Apoptosis inhibitor 5 OS=Gallus gallus GN=API5 PE=2 SV=1 - [API5_CHICK]                       | 247.27  | 1.098 | 58.6 | 7.39  |
| F1NI14 | Taxilin gamma OS=Gallus gallus GN=TXLNG PE=4 SV=2 - [F1NI14_CHICK]                            | 37.79   | 1.098 | 56.5 | 5.96  |
| Q9PT88 | RNA polymerase common subunit RPB6 OS=Gallus gallus GN=RPB6 PE=2 SV=1 - [Q9PT88_CHICK]        | 31.69   | 1.097 | 14.5 | 4.22  |
| F1P0Q8 | H/ACA ribonucleoprotein complex subunit 4 OS=Gallus gallus GN=DKC1 PE=4 SV=2 - [F1P0Q8_CHICK] | 69.01   | 1.097 | 58.1 | 9.28  |
| F1NHW3 | Enhancer of rudimentary homolog OS=Gallus gallus GN=ERH PE=3 SV=1 - [F1NHW3_CHICK]            | 35.65   | 1.096 | 12.3 | 5.92  |
| P08284 | Histone H1.01 OS=Gallus gallus PE=1 SV=2 - [H101_CHICK]                                       | 487.67  | 1.095 | 22.0 | 11.17 |



|        |                                                                                                                  |        |       |       |      |
|--------|------------------------------------------------------------------------------------------------------------------|--------|-------|-------|------|
| Q5ZI57 | Trafficking protein particle complex subunit 3 OS=Gallus gallus GN=TRAPPC3 PE=2 SV=1 - [TPPC3_CHICK]             | 37.93  | 1.094 | 20.3  | 4.96 |
| P17926 | Nuclear factor 1 C-type OS=Gallus gallus GN=NFIC PE=1 SV=1 - [NFIC_CHICK]                                        | 0.00   | 1.094 | 49.2  | 8.12 |
| E1C8R3 | Carbohydrate sulfotransferase 3 OS=Gallus gallus GN=CHST3 PE=4 SV=2 - [E1C8R3_CHICK]                             | 0.00   | 1.094 | 52.2  | 8.95 |
| Q5XNV3 | Cytoplasmic activation-proliferation-associated protein 1 OS=Gallus gallus GN=CAPRIN1 PE=2 SV=1 - [Q5XNV3_CHICK] | 146.74 | 1.093 | 77.9  | 5.16 |
| F1NMM9 | Uridine-cytidine kinase OS=Gallus gallus GN=UCK2 PE=3 SV=2 - [F1NMM9_CHICK]                                      | 16.50  | 1.093 | 29.4  | 5.97 |
| Q5F334 | Leucine-rich repeat-containing protein 59 OS=Gallus gallus GN=LRRRC59 PE=2 SV=1 - [LRC59_CHICK]                  | 148.66 | 1.093 | 38.6  | 9.23 |
| R4GH14 | Charged multivesicular body protein 6 (Fragment) OS=Gallus gallus GN=CHMP6 PE=4 SV=1 - [R4GH14_CHICK]            | 0.00   | 1.092 | 12.7  | 4.09 |
| E1BUW6 | Microtubule-associated protein OS=Gallus gallus PE=4 SV=2 - [E1BUW6_CHICK]                                       | 264.37 | 1.092 | 86.1  | 9.04 |
| F1NZW0 | Transcription initiation factor TFIID subunit 3 OS=Gallus gallus GN=TAF3 PE=4 SV=2 - [F1NZW0_CHICK]              | 26.71  | 1.091 | 103.1 | 8.95 |
| F1NYC4 | Clathrin heavy chain (Fragment) OS=Gallus gallus GN=CLTCL1 PE=3 SV=1 - [F1NYC4_CHICK]                            | 361.39 | 1.090 | 191.8 | 5.85 |
| P84175 | 40S ribosomal protein S12 OS=Gallus gallus GN=RPS12 PE=1 SV=2 - [RS12_CHICK]                                     | 66.86  | 1.089 | 14.5  | 7.21 |
| Q5F450 | PAB-dependent poly(A)-specific ribonuclease subunit 2 OS=Gallus gallus GN=PAN2 PE=2 SV=1 - [PAN2_CHICK]          | 47.48  | 1.089 | 134.8 | 5.68 |

|        |                                                                                                                  |        |       |       |      |
|--------|------------------------------------------------------------------------------------------------------------------|--------|-------|-------|------|
| F1NGH3 | Nuclear factor NF-kappa-B p100 subunit (Fragment) OS=Gallus gallus GN=NFKB2 PE=4 SV=2 - [F1NGH3_CHICK]           | 0.00   | 1.089 | 98.0  | 6.42 |
| Q5F470 | Ras-related protein Rab-8A OS=Gallus gallus GN=RAB8A PE=2 SV=1 - [RAB8A_CHICK]                                   | 93.13  | 1.089 | 23.5  | 9.09 |
| Q5F471 | Serine/threonine-protein phosphatase 6 regulatory subunit 3 OS=Gallus gallus GN=PPP6R3 PE=2 SV=1 - [PP6R3_CHICK] | 38.49  | 1.089 | 98.2  | 4.58 |
| F1NB93 | Peroxisomal targeting signal 1 receptor (Fragment) OS=Gallus gallus GN=PEX5 PE=4 SV=2 - [F1NB93_CHICK]           | 0.00   | 1.089 | 66.5  | 4.68 |
| P62764 | Visinin-like protein 1 OS=Gallus gallus GN=VSNL1 PE=2 SV=2 - [VISL1_CHICK]                                       | 0.00   | 1.088 | 22.1  | 5.15 |
| O42130 | DNA topoisomerase 2-alpha OS=Gallus gallus GN=TOP2A PE=2 SV=2 - [TOP2A_CHICK]                                    | 101.55 | 1.088 | 174.9 | 8.81 |
| F1NAZ3 | Kinesin-like protein KIF2A OS=Gallus gallus GN=KIF2A PE=3 SV=2 - [F1NAZ3_CHICK]                                  | 19.08  | 1.086 | 79.9  | 6.68 |
| F1NCR3 | Cytosolic purine 5'-nucleotidase OS=Gallus gallus GN=NT5C2 PE=3 SV=1 - [F1NCR3_CHICK]                            | 38.34  | 1.086 | 65.9  | 5.49 |
| Q1KME6 | Ras-related protein Rab-6A OS=Gallus gallus GN=RAB6A PE=2 SV=3 - [RAB6A_CHICK]                                   | 326.78 | 1.086 | 23.5  | 5.54 |
| F1NGV1 | Zinc finger CCCH domain-containing protein 15 (Fragment) OS=Gallus gallus GN=ZC3H15 PE=4 SV=2 - [F1NGV1_CHICK]   | 37.23  | 1.085 | 48.7  | 5.10 |
| F2Z4M0 | Histone-binding protein RBBP4 OS=Gallus gallus GN=RBBP4 PE=4 SV=1 - [F2Z4M0_CHICK]                               | 120.37 | 1.084 | 47.6  | 4.89 |
| P28337 | Aminomethyltransferase, mitochondrial OS=Gallus gallus GN=AMT PE=2 SV=2 - [GCST_CHICK]                           | 0.00   | 1.084 | 42.0  | 8.88 |

|        |                                                                                                                             |        |       |       |       |
|--------|-----------------------------------------------------------------------------------------------------------------------------|--------|-------|-------|-------|
| F1NUY9 | Ufm1-specific protease 2 OS=Gallus gallus GN=UFSP2 PE=4 SV=1 - [F1NUY9_CHICK]                                               | 0.00   | 1.084 | 52.1  | 6.70  |
| Q90631 | Kinectin OS=Gallus gallus GN=KTN1 PE=1 SV=1 - [KTN1_CHICK]                                                                  | 879.49 | 1.084 | 155.9 | 5.90  |
| Q5ZMR3 | Protein-L-isoaspartate O-methyltransferase domain-containing protein 1 OS=Gallus gallus GN=PCMTD1 PE=2 SV=1 - [PCMD1_CHICK] | 0.00   | 1.083 | 40.9  | 5.91  |
| P84247 | Histone H3.3 OS=Gallus gallus GN=H3-IX PE=1 SV=2 - [H33_CHICK]                                                              | 39.79  | 1.083 | 15.3  | 11.27 |
| Q5ZL33 | Serine-threonine kinase receptor-associated protein OS=Gallus gallus GN=STRAP PE=2 SV=2 - [STRAP_CHICK]                     | 249.06 | 1.083 | 38.1  | 5.11  |
| F1P4P0 | Ubiquitin-fold modifier 1 (Fragment) OS=Gallus gallus GN=UFM1 PE=4 SV=1 - [F1P4P0_CHICK]                                    | 34.95  | 1.083 | 9.0   | 9.60  |
| A0M8T8 | Caveolin OS=Gallus gallus GN=CAV1 PE=3 SV=1 - [A0M8T8_CHICK]                                                                | 69.51  | 1.082 | 20.5  | 6.28  |
| Q5ZKK2 | Integrator complex subunit 9 OS=Gallus gallus GN=INTS9 PE=2 SV=1 - [INT9_CHICK]                                             | 0.00   | 1.082 | 73.7  | 6.37  |
| Q5H7N8 | Zinc finger CCCH domain-containing protein 15 OS=Gallus gallus GN=ZC3H15 PE=1 SV=1 - [ZC3HF_CHICK]                          | 35.04  | 1.081 | 49.0  | 5.16  |
| F1NU40 | Nucleolin OS=Gallus gallus GN=NCL PE=4 SV=2 - [F1NU40_CHICK]                                                                | 775.81 | 1.081 | 75.4  | 4.92  |
| Q5ZJ65 | Protein FAM76A OS=Gallus gallus GN=FAM76A PE=2 SV=1 - [FA76A_CHICK]                                                         | 36.72  | 1.081 | 34.9  | 9.14  |
| F6UZR6 | Lamin-B receptor OS=Gallus gallus GN=LBR PE=4 SV=1 - [F6UZR6_CHICK]                                                         | 56.08  | 1.080 | 73.3  | 9.07  |

|        |                                                                                                         |        |       |       |       |
|--------|---------------------------------------------------------------------------------------------------------|--------|-------|-------|-------|
| E1C6Y7 | pre-rRNA-processing protein FTSJ3 OS=Gallus gallus GN=FTSJ3 PE=3 SV=2 - [E1C6Y7_CHICK]                  | 74.07  | 1.080 | 92.6  | 6.92  |
| R4GJ94 | Dynamin-like 120 kDa protein, mitochondrial OS=Gallus gallus GN=OPA1 PE=3 SV=1 - [R4GJ94_CHICK]         | 66.75  | 1.080 | 115.7 | 8.34  |
| F2Z4M3 | 40S ribosomal protein S15 (Fragment) OS=Gallus gallus GN=RPS15 PE=3 SV=1 - [F2Z4M3_CHICK]               | 0.00   | 1.080 | 16.9  | 10.39 |
| P09645 | Tubulin alpha-8 chain (Fragment) OS=Gallus gallus PE=3 SV=1 - [TBA8_CHICK]                              | 462.63 | 1.080 | 36.1  | 4.93  |
| Q2MCJ7 | Aquaporin-1 OS=Gallus gallus GN=AQP1 PE=2 SV=1 - [Q2MCJ7_CHICK]                                         | 0.00   | 1.079 | 28.5  | 6.90  |
| Q8JGM4 | Sulfhydryl oxidase 1 OS=Gallus gallus GN=QSOX1 PE=1 SV=1 - [QSOX1_CHICK]                                | 36.43  | 1.078 | 83.0  | 7.40  |
| Q5ZJS6 | Polyadenylate-binding protein-interacting protein 2 OS=Gallus gallus GN=PAIP2 PE=2 SV=1 - [PAIP2_CHICK] | 21.33  | 1.078 | 15.0  | 4.12  |
| Q5ZHV6 | GrpE protein homolog OS=Gallus gallus GN=GRPEL1 PE=2 SV=1 - [Q5ZHV6_CHICK]                              | 145.11 | 1.078 | 24.8  | 7.49  |
| Q5ZJF1 | COP9 signalosome complex subunit 3 OS=Gallus gallus GN=COPS3 PE=2 SV=1 - [CSN3_CHICK]                   | 0.00   | 1.078 | 47.9  | 6.79  |
| F1NH21 | Hsc70-interacting protein OS=Gallus gallus GN=ST13 PE=4 SV=1 - [F1NH21_CHICK]                           | 59.23  | 1.078 | 40.2  | 5.14  |
| Q5ZL00 | ER membrane protein complex subunit 1 OS=Gallus gallus GN=EMC1 PE=2 SV=1 - [EMC1_CHICK]                 | 111.61 | 1.078 | 109.8 | 7.52  |
| Q5F3A1 | Translocation protein SEC62 OS=Gallus gallus GN=SEC62 PE=2 SV=1 - [SEC62_CHICK]                         | 40.32  | 1.078 | 45.9  | 7.08  |
| F1NP51 | Lamin-B2 OS=Gallus gallus GN=LMNB2 PE=3 SV=1 - [F1NP51_CHICK]                                           | 458.32 | 1.077 | 67.9  | 5.27  |
| Q90879 | Ubiquitin-conjugating enzyme E2 variant 1 OS=Gallus gallus GN=UBE2V1 PE=2 SV=2 - [UB2V1_CHICK]          | 83.22  | 1.077 | 16.3  | 7.94  |

|          |                                                                                                                  |        |       |       |       |
|----------|------------------------------------------------------------------------------------------------------------------|--------|-------|-------|-------|
| F1NFV6   | Fos-related antigen 2 OS=Gallus gallus GN=FOSL2 PE=4 SV=2 - [F1NFV6_CHICK]                                       | 34.46  | 1.077 | 33.1  | 8.97  |
| Q9YH18-2 | Isoform 2 of Protein quaking OS=Gallus gallus GN=QKI - [QKI_CHICK]                                               | 119.51 | 1.077 | 36.8  | 8.56  |
| F1NYB3   | Nucleolar and spindle-associated protein 1 OS=Gallus gallus GN=NUSAP1 PE=4 SV=1 - [F1NYB3_CHICK]                 | 0.00   | 1.076 | 52.2  | 9.94  |
| E1BYG9   | Coiled-coil domain-containing protein 50 OS=Gallus gallus GN=CCDC50 PE=4 SV=2 - [E1BYG9_CHICK]                   | 0.00   | 1.076 | 35.4  | 7.34  |
| P02272   | Histone H2A.V OS=Gallus gallus GN=H2AFV PE=1 SV=2 - [H2AV_CHICK]                                                 | 417.72 | 1.075 | 13.5  | 10.58 |
| F1NZ28   | Anoctamin OS=Gallus gallus GN=ANO10 PE=3 SV=2 - [F1NZ28_CHICK]                                                   | 70.84  | 1.075 | 70.9  | 7.33  |
| F1N9Z7   | Succinyl-CoA:3-ketoacid-coenzyme A transferase OS=Gallus gallus GN=OXCT1 PE=3 SV=2 - [F1N9Z7_CHICK]              | 484.87 | 1.075 | 56.1  | 7.91  |
| P0C1H3   | Histone H2B 1/2/3/4/6 OS=Gallus gallus GN=H2B-I PE=1 SV=2 - [H2B1_CHICK]                                         | 644.90 | 1.075 | 13.9  | 10.27 |
| E1C8U1   | Nucleoporin NUP53 OS=Gallus gallus GN=NUP35 PE=3 SV=2 - [E1C8U1_CHICK]                                           | 57.92  | 1.074 | 34.5  | 9.07  |
| F1NID5   | Ubiquitin-associated domain-containing protein 1 (Fragment) OS=Gallus gallus GN=UBAC1 PE=4 SV=2 - [F1NID5_CHICK] | 0.00   | 1.073 | 45.4  | 5.02  |
| E1BQL2   | Serine/arginine repetitive matrix protein 1 OS=Gallus gallus GN=SRRM1 PE=4 SV=2 - [E1BQL2_CHICK]                 | 44.16  | 1.072 | 100.8 | 11.82 |
| Q90679   | Thymocyte nuclear protein 1 OS=Gallus gallus GN=THYN1 PE=1 SV=1 - [THYN1_CHICK]                                  | 102.91 | 1.072 | 27.9  | 8.29  |
| O42395   | Cellular nucleic acid-binding protein OS=Gallus gallus GN=CNBP PE=2 SV=1 - [CNBP_CHICK]                          | 37.77  | 1.072 | 19.0  | 7.83  |

|        |                                                                                                                  |         |       |       |      |
|--------|------------------------------------------------------------------------------------------------------------------|---------|-------|-------|------|
| F1P4U4 | Ubiquitin carboxyl-terminal hydrolase (Fragment) OS=Gallus gallus GN=USP7 PE=3 SV=1 - [F1P4U4_CHICK]             | 94.04   | 1.071 | 125.4 | 5.71 |
| F1NWB7 | Endoplasmic OS=Gallus gallus GN=HSP90B1 PE=3 SV=1 - [F1NWB7_CHICK]                                               | 534.94  | 1.070 | 91.5  | 4.89 |
| F1N988 | Clustered mitochondria protein homolog OS=Gallus gallus GN=KIAA0664 PE=3 SV=2 - [F1N988_CHICK]                   | 0.00    | 1.070 | 150.4 | 6.10 |
| Q5ZLM0 | Parafibromin OS=Gallus gallus GN=CDC73 PE=2 SV=1 - [CDC73_CHICK]                                                 | 41.39   | 1.070 | 60.7  | 9.61 |
| G1K2Z3 | Paired mesoderm homeobox protein 1 OS=Gallus gallus GN=PRRX1 PE=3 SV=1 - [G1K2Z3_CHICK]                          | 54.11   | 1.070 | 27.2  | 9.47 |
| Q5F3D1 | Zinc finger CCHC domain-containing protein 8 OS=Gallus gallus GN=ZCCHC8 PE=2 SV=1 - [ZCCHC8_CHICK]               | 0.00    | 1.070 | 68.4  | 5.05 |
| E1C8Q5 | V-type proton ATPase 116 kDa subunit a isoform 1 OS=Gallus gallus GN=ATP6V0A1 PE=4 SV=2 - [E1C8Q5_CHICK]         | 77.80   | 1.070 | 95.3  | 6.74 |
| Q5ZK33 | LETM1 and EF-hand domain-containing protein 1, mitochondrial OS=Gallus gallus GN=LETM1 PE=2 SV=1 - [LETM1_CHICK] | 155.92  | 1.070 | 85.8  | 6.71 |
| R4GKR9 | DNA replication complex GINS protein PSF2 OS=Gallus gallus GN=GINS2 PE=3 SV=1 - [R4GKR9_CHICK]                   | 53.13   | 1.069 | 21.2  | 5.07 |
| Q5ZL72 | 60 kDa heat shock protein, mitochondrial OS=Gallus gallus GN=HSPD1 PE=1 SV=1 - [CH60_CHICK]                      | 1427.97 | 1.069 | 60.9  | 5.87 |
| Q4JIM4 | Presenilin-1 OS=Gallus gallus GN=PSEN1 PE=1 SV=1 - [PSN1_CHICK]                                                  | 18.46   | 1.069 | 52.8  | 5.10 |
| P63270 | Actin, gamma-enteric smooth muscle OS=Gallus gallus GN=ACTG2 PE=1 SV=1 - [ACTH_CHICK]                            | 1825.98 | 1.068 | 41.8  | 5.48 |

|        |                                                                                                              |        |       |      |       |
|--------|--------------------------------------------------------------------------------------------------------------|--------|-------|------|-------|
| P07322 | Beta-enolase OS=Gallus gallus GN=ENO3 PE=1 SV=3 - [ENOB_CHICK]                                               | 35.08  | 1.068 | 47.2 | 7.61  |
| F1P4J0 | Ribosomal protein S6 kinase OS=Gallus gallus GN=RPS6KB1 PE=3 SV=1 - [F1P4J0_CHICK]                           | 0.00   | 1.068 | 56.1 | 6.44  |
| P32882 | Tubulin beta-2 chain OS=Gallus gallus PE=2 SV=1 - [TBB2_CHICK]                                               | 835.42 | 1.067 | 49.9 | 4.89  |
| E1C0E5 | Transmembrane protein 9B OS=Gallus gallus GN=TMEM9B PE=2 SV=2 - [E1C0E5_CHICK]                               | 27.15  | 1.066 | 21.3 | 7.84  |
| Q5F477 | UPF0554 protein C2orf43 homolog OS=Gallus gallus GN=RCJMB04_2g19 PE=2 SV=2 - [CB043_CHICK]                   | 0.00   | 1.066 | 36.9 | 7.33  |
| Q90955 | Prostaglandin E synthase 3 (Fragment) OS=Gallus gallus GN=PTGES3 PE=1 SV=1 - [TEBP_CHICK]                    | 80.47  | 1.066 | 16.9 | 4.41  |
| Q5ZLL0 | Vacuolar ATPase assembly integral membrane protein VMA21 OS=Gallus gallus GN=VMA21 PE=3 SV=1 - [VMA21_CHICK] | 0.00   | 1.066 | 11.6 | 7.24  |
| F6RW83 | Ribosomal protein L19 OS=Gallus gallus GN=RPL19 PE=3 SV=1 - [F6RW83_CHICK]                                   | 114.74 | 1.065 | 23.2 | 11.36 |
| F1NHH9 | D-beta-hydroxybutyrate dehydrogenase, mitochondrial OS=Gallus gallus GN=BDH1 PE=3 SV=1 - [F1NHH9_CHICK]      | 32.32  | 1.065 | 38.0 | 7.93  |
| E1C1L6 | Ectonucleoside triphosphate diphosphohydrolase 5 OS=Gallus gallus GN=ENTPD5 PE=3 SV=1 - [ENTP5_CHICK]        | 0.00   | 1.065 | 47.9 | 5.62  |
| F1NDP5 | Thiosulfate sulfurtransferase OS=Gallus gallus GN=TST PE=4 SV=2 - [F1NDP5_CHICK]                             | 59.60  | 1.065 | 32.9 | 7.58  |
| Q5ZIL4 | Spermatid perinuclear RNA-binding protein OS=Gallus gallus GN=STRBP PE=2 SV=1 - [STRBP_CHICK]                | 0.00   | 1.064 | 73.3 | 8.73  |

|        |                                                                                                                           |        |       |      |      |
|--------|---------------------------------------------------------------------------------------------------------------------------|--------|-------|------|------|
| P47826 | 60S acidic ribosomal protein P0 OS=Gallus gallus GN=RPLP0 PE=2 SV=1 - [RLA0_CHICK]                                        | 302.72 | 1.064 | 34.3 | 5.99 |
| Q90ZK6 | Activin receptor type-1 OS=Gallus gallus GN=ACVR1 PE=2 SV=1 - [ACVR1_CHICK]                                               | 84.41  | 1.064 | 56.2 | 7.11 |
| R4GLP7 | Citrate synthase OS=Gallus gallus GN=LOC100858903 PE=3 SV=1 - [R4GLP7_CHICK]                                              | 218.37 | 1.063 | 42.5 | 6.99 |
| Q5ZHP3 | UPF0468 protein C16orf80 homolog OS=Gallus gallus GN=RCJMB04_34o2 PE=2 SV=1 - [CP080_CHICK]                               | 0.00   | 1.061 | 22.7 | 9.76 |
| Q5ZML4 | Cysteine and histidine-rich domain-containing protein 1 OS=Gallus gallus GN=CHORDC1 PE=2 SV=1 - [CHRD1_CHICK]             | 0.00   | 1.061 | 37.3 | 7.24 |
| H9L2N7 | Protein pelota homolog OS=Gallus gallus GN=PELO PE=4 SV=2 - [H9L2N7_CHICK]                                                | 0.00   | 1.061 | 43.5 | 6.09 |
| F1NLF1 | Hydroxysteroid dehydrogenase-like protein 1 OS=Gallus gallus GN=HSDL1 PE=3 SV=1 - [F1NLF1_CHICK]                          | 36.62  | 1.061 | 37.6 | 9.14 |
| F1NGU9 | Cleavage and polyadenylation-specificity factor subunit 6 OS=Gallus gallus GN=CPSF6 PE=4 SV=1 - [F1NGU9_CHICK]            | 173.74 | 1.060 | 59.1 | 7.40 |
| F1NAD0 | LysM and putative peptidoglycan-binding domain-containing protein 3 OS=Gallus gallus GN=LYSMD3 PE=4 SV=1 - [F1NAD0_CHICK] | 34.26  | 1.060 | 33.4 | 6.86 |
| Q5ZJ40 | REST corepressor 3 OS=Gallus gallus GN=RCOR3 PE=2 SV=1 - [RCOR3_CHICK]                                                    | 47.74  | 1.059 | 42.4 | 8.65 |
| Q5ZHV1 | Ras-related protein Rab-33B OS=Gallus gallus GN=RAB33B PE=2 SV=1 - [RB33B_CHICK]                                          | 0.00   | 1.059 | 25.7 | 8.05 |
| F1NKB6 | 6-phosphofructokinase OS=Gallus gallus GN=PFKL PE=3 SV=2 - [F1NKB6_CHICK]                                                 | 44.25  | 1.059 | 84.0 | 7.43 |



|          |                                                                                                          |         |       |      |       |
|----------|----------------------------------------------------------------------------------------------------------|---------|-------|------|-------|
| F1NKG6   | Protein CYR61 (Fragment) OS=Gallus gallus GN=CYR61 PE=4 SV=2 - [F1NKG6_CHICK]                            | 0.00    | 1.058 | 33.9 | 8.09  |
| Q5ZM44   | Calcineurin B homologous protein 1 OS=Gallus gallus GN=CHP1 PE=1 SV=3 - [CHP1_CHICK]                     | 71.56   | 1.058 | 22.4 | 5.10  |
| Q9YGL6-2 | Isoform 2 of Paralemmin-1 OS=Gallus gallus GN=PALM - [PALM_CHICK]                                        | 0.00    | 1.058 | 35.0 | 4.84  |
| P84229   | Histone H3.2 OS=Gallus gallus GN=H3-I PE=1 SV=2 - [H32_CHICK]                                            | 22.98   | 1.058 | 15.4 | 11.27 |
| F1NF89   | 40S ribosomal protein S24 OS=Gallus gallus GN=RPS24 PE=3 SV=2 - [F1NF89_CHICK]                           | 110.69  | 1.058 | 15.6 | 10.78 |
| F1NYY5   | Phosphoethanolamine/phosphocholine phosphatase OS=Gallus gallus GN=PHOSPHO1 PE=4 SV=1 - [F1NYY5_CHICK]   | 0.00    | 1.057 | 30.6 | 6.67  |
| R4GJN7   | Histone H2A OS=Gallus gallus GN=LOC100857391 PE=3 SV=1 - [R4GJN7_CHICK]                                  | 687.52  | 1.057 | 15.0 | 10.87 |
| Q5ZLE6   | Eukaryotic translation initiation factor 3 subunit H OS=Gallus gallus GN=EIF3H PE=2 SV=1 - [EIF3H_CHICK] | 107.86  | 1.057 | 39.5 | 6.47  |
| Q8JG64   | Protein disulfide-isomerase A3 OS=Gallus gallus GN=PDIA3 PE=2 SV=1 - [PDIA3_CHICK]                       | 1732.89 | 1.056 | 56.1 | 6.02  |
| Q6Q122   | NADH dehydrogenase [ubiquinone] 1 subunit C2 OS=Gallus gallus GN=NDUFC2 PE=3 SV=1 - [Q6Q122_CHICK]       | 0.00    | 1.056 | 11.0 | 9.25  |
| R9PXM0   | Cyclin-dependent kinase 9 (Fragment) OS=Gallus gallus GN=CDK9 PE=4 SV=1 - [R9PXM0_CHICK]                 | 23.50   | 1.056 | 39.4 | 9.23  |
| P07850   | Sulfite oxidase OS=Gallus gallus GN=SUOX PE=1 SV=3 - [SUOX_CHICK]                                        | 0.00    | 1.056 | 50.2 | 6.18  |

|          |                                                                                                             |        |       |       |       |
|----------|-------------------------------------------------------------------------------------------------------------|--------|-------|-------|-------|
| Q7SX83   | CAMP response element-binding protein OS=Gallus gallus GN=CREB1 PE=2 SV=1 - [Q7SX83_CHICK]                  | 68.98  | 1.056 | 35.1  | 5.27  |
| Q5ZM11   | Arginine--tRNA ligase, cytoplasmic OS=Gallus gallus GN=RARS PE=2 SV=1 - [SYRC_CHICK]                        | 183.09 | 1.056 | 75.4  | 7.11  |
| Q03669-2 | Isoform 2 of Sarcoplasmic/endoplasmic reticulum calcium ATPase 2 OS=Gallus gallus GN=ATP2A2 - [AT2A2_CHICK] | 118.88 | 1.056 | 109.7 | 5.36  |
| F1P442   | NEDD8-activating enzyme E1 regulatory subunit OS=Gallus gallus GN=NAE1 PE=4 SV=2 - [F1P442_CHICK]           | 51.43  | 1.055 | 60.4  | 5.58  |
| Q90623-2 | Isoform 2 of Protein phosphatase 1 regulatory subunit 12A OS=Gallus gallus GN=PPP1R12A - [MYPT1_CHICK]      | 70.78  | 1.054 | 106.9 | 5.45  |
| Q5ZH20   | Spliceosome RNA helicase DDX39B OS=Gallus gallus GN=DDX39B PE=2 SV=1 - [DX39B_CHICK]                        | 212.37 | 1.054 | 49.0  | 5.67  |
| Q5ZKD1   | Choline/ethanolaminephosphotransferase 1 OS=Gallus gallus GN=CEPT1 PE=2 SV=2 - [CEPT1_CHICK]                | 0.00   | 1.054 | 46.1  | 8.00  |
| E1BVX9   | Signal recognition particle subunit SRP72 OS=Gallus gallus GN=SRP72 PE=3 SV=1 - [E1BVX9_CHICK]              | 146.44 | 1.054 | 74.4  | 9.20  |
| P47838   | 40S ribosomal protein S6 OS=Gallus gallus GN=RPS6 PE=2 SV=1 - [RS6_CHICK]                                   | 104.68 | 1.054 | 28.6  | 10.83 |
| F1NDA0   | Glycylpeptide N-tetradecanoyltransferase OS=Gallus gallus GN=NMT1 PE=3 SV=2 - [F1NDA0_CHICK]                | 0.00   | 1.054 | 56.8  | 8.57  |
| P05625   | RAF proto-oncogene serine/threonine-protein kinase OS=Gallus gallus GN=RAF1 PE=2 SV=1 - [RAF1_CHICK]        | 0.00   | 1.053 | 73.1  | 9.22  |
| Q5F3X4   | 116 kDa U5 small nuclear ribonucleoprotein component OS=Gallus gallus GN=EFTUD2 PE=2 SV=1 -                 | 174.73 | 1.052 | 109.4 | 5.00  |

| [U5S1_CHICK] |                                                                                                        |        |       |       |      |  |
|--------------|--------------------------------------------------------------------------------------------------------|--------|-------|-------|------|--|
| Q5ZHV7       | SPRY domain-containing protein 7 OS=Gallus gallus GN=SPRYD7 PE=2 SV=1 - [SPRY7_CHICK]                  | 32.37  | 1.052 | 21.7  | 6.77 |  |
| E1BYM1       | mRNA cap guanine-N7 methyltransferase OS=Gallus gallus GN=RNMT PE=3 SV=1 - [E1BYM1_CHICK]              | 75.87  | 1.052 | 47.5  | 5.62 |  |
| P0CB50       | Peroxiredoxin-1 OS=Gallus gallus GN=PRDX1 PE=1 SV=1 - [PRDX1_CHICK]                                    | 558.55 | 1.051 | 22.3  | 8.10 |  |
| Q66VY4       | Splicing factor 3a subunit 2 OS=Gallus gallus GN=SF3A2 PE=2 SV=1 - [Q66VY4_CHICK]                      | 0.00   | 1.051 | 35.1  | 9.64 |  |
| O42146       | Metalloproteinase inhibitor 2 OS=Gallus gallus GN=TIMP2 PE=2 SV=1 - [TIMP2_CHICK]                      | 28.33  | 1.051 | 24.3  | 7.47 |  |
| Q5ZKQ7       | Glucose-induced degradation protein 8 homolog OS=Gallus gallus GN=GID8 PE=2 SV=1 - [GID8_CHICK]        | 67.88  | 1.051 | 26.8  | 4.92 |  |
| F1NYW0       | Tyrosine-protein phosphatase non-receptor type OS=Gallus gallus GN=PTPN2 PE=3 SV=2 -<br>[F1NYW0_CHICK] | 85.78  | 1.051 | 48.8  | 8.85 |  |
| Q9YH14       | Progesterone receptor binding protein OS=Gallus gallus GN=rbf PE=4 SV=1 - [Q9YH14_CHICK]               | 69.21  | 1.051 | 8.3   | 8.37 |  |
| Q9DFZ3       | Protein Churchill OS=Gallus gallus GN=CHURC1 PE=3 SV=1 - [CHUR_CHICK]                                  | 15.86  | 1.050 | 12.5  | 5.20 |  |
| E1C3D2       | Septin-2 OS=Gallus gallus GN=SEPT2 PE=3 SV=1 - [E1C3D2_CHICK]                                          | 241.13 | 1.050 | 41.6  | 6.30 |  |
| Q5ZK71       | DNA topoisomerase OS=Gallus gallus GN=TOP3B PE=2 SV=1 - [Q5ZK71_CHICK]                                 | 0.00   | 1.050 | 96.6  | 8.09 |  |
| F1NDN4       | Structural maintenance of chromosomes protein OS=Gallus gallus GN=SMC4 PE=3 SV=1 -<br>[F1NDN4_CHICK]   | 26.17  | 1.050 | 145.6 | 6.40 |  |

|        |                                                                                                                                         |        |       |       |      |
|--------|-----------------------------------------------------------------------------------------------------------------------------------------|--------|-------|-------|------|
| F6SU35 | Ribosomal protein OS=Gallus gallus GN=RPL10A PE=3 SV=1 - [F6SU35_CHICK]                                                                 | 145.45 | 1.050 | 24.7  | 9.88 |
| F1NNZ9 | Protein kinase C and casein kinase substrate in neurons protein 2 OS=Gallus gallus GN=PACSIN2 PE=4 SV=1 - [F1NNZ9_CHICK]                | 82.36  | 1.049 | 51.7  | 5.34 |
| P62758 | Neurocalcin-delta OS=Gallus gallus GN=NCALD PE=2 SV=2 - [NCALD_CHICK]                                                                   | 0.00   | 1.049 | 22.2  | 5.35 |
| E1C0F1 | Dolichyl-diphosphooligosaccharide--protein glycosyltransferase subunit 1 (Fragment) OS=Gallus gallus GN=RPN1 PE=4 SV=2 - [E1C0F1_CHICK] | 293.79 | 1.048 | 60.6  | 6.89 |
| P35458 | Dynactin subunit 1 OS=Gallus gallus GN=DCTN1 PE=2 SV=2 - [DCTN1_CHICK]                                                                  | 99.55  | 1.048 | 135.5 | 6.54 |
| Q5ZLN4 | Flap endonuclease 1 OS=Gallus gallus GN=FEN1 PE=2 SV=1 - [FEN1_CHICK]                                                                   | 238.65 | 1.048 | 43.0  | 8.12 |
| F1NXG8 | Pleckstrin homology domain-containing family B member 2 OS=Gallus gallus GN=PLEKHB2 PE=4 SV=1 - [F1NXG8_CHICK]                          | 43.61  | 1.048 | 25.4  | 6.28 |
| F1NTR5 | Putative Polycomb group protein ASXL2 OS=Gallus gallus GN=ASXL2 PE=4 SV=2 - [F1NTR5_CHICK]                                              | 36.36  | 1.047 | 142.7 | 8.31 |
| P62207 | Serine/threonine-protein phosphatase PP1-beta catalytic subunit OS=Gallus gallus GN=PPP1CB PE=1 SV=3 - [PP1B_CHICK]                     | 59.43  | 1.047 | 37.2  | 6.19 |
| E1C6T4 | Serine/threonine-protein kinase D OS=Gallus gallus GN=PRKD3 PE=3 SV=1 - [E1C6T4_CHICK]                                                  | 0.00   | 1.047 | 100.3 | 6.73 |
| E1C231 | E3 ubiquitin-protein ligase listerin OS=Gallus gallus GN=LTN1 PE=3 SV=1 - [LTN1_CHICK]                                                  | 0.00   | 1.047 | 199.3 | 6.05 |
| E1C453 | Heterogeneous nuclear ribonucleoprotein K OS=Gallus gallus GN=HNRNPK PE=4 SV=1 -                                                        | 486.97 | 1.046 | 47.1  | 6.47 |

|        |                                                                                                        |         |       |       |      |
|--------|--------------------------------------------------------------------------------------------------------|---------|-------|-------|------|
|        | [E1C453_CHICK]                                                                                         |         |       |       |      |
| G1K303 | Hydroxyacylglutathione hydrolase, mitochondrial OS=Gallus gallus GN=HAGH PE=3 SV=2 -<br>[G1K303_CHICK] | 0.00    | 1.046 | 34.2  | 7.81 |
| Q5ZLG1 | Ras-related protein Rab-18 OS=Gallus gallus GN=RAB18 PE=2 SV=1 - [RAB18_CHICK]                         | 116.11  | 1.046 | 22.9  | 5.36 |
| Q800K9 | Surfeit locus protein 4 OS=Gallus gallus GN=SURF4 PE=2 SV=1 - [SURF4_CHICK]                            | 30.80   | 1.045 | 30.6  | 7.78 |
| E1C7T8 | Coatomer subunit gamma OS=Gallus gallus GN=COPG2 PE=3 SV=1 - [E1C7T8_CHICK]                            | 139.37  | 1.045 | 97.5  | 5.69 |
| F1NH33 | Aldehyde dehydrogenase OS=Gallus gallus GN=ALDH3A2 PE=3 SV=1 - [F1NH33_CHICK]                          | 70.03   | 1.045 | 54.1  | 8.02 |
| Q5ZJ43 | Exocyst complex component 8 OS=Gallus gallus GN=EXOC8 PE=2 SV=1 - [EXOC8_CHICK]                        | 23.98   | 1.044 | 80.4  | 5.30 |
| P14105 | Myosin-9 OS=Gallus gallus GN=MYH9 PE=2 SV=1 - [MYH9_CHICK]                                             | 1857.92 | 1.044 | 226.4 | 5.57 |
| Q90ZH5 | SAP18 OS=Gallus gallus GN=chSAP18 PE=1 SV=1 - [Q90ZH5_CHICK]                                           | 0.00    | 1.044 | 17.6  | 9.35 |
| F1P0B0 | Integrin alpha-6 (Fragment) OS=Gallus gallus GN=ITGA6 PE=3 SV=2 - [F1P0B0_CHICK]                       | 47.16   | 1.044 | 115.0 | 6.73 |
| E1BR08 | Histone H2A OS=Gallus gallus GN=H2AFY2 PE=3 SV=1 - [E1BR08_CHICK]                                      | 23.89   | 1.044 | 40.2  | 9.70 |
| Q5F3Z7 | CTD small phosphatase-like protein 2 OS=Gallus gallus GN=CTDSPL2 PE=2 SV=2 - [CTSL2_CHICK]             | 0.00    | 1.044 | 52.8  | 6.42 |
| Q98SN3 | Aryl hydrocarbon receptor nuclear translocator OS=Gallus gallus GN=ARNT PE=2 SV=1 -<br>[Q98SN3_CHICK]  | 0.00    | 1.044 | 87.6  | 6.49 |

|        |                                                                                                   |         |       |       |      |
|--------|---------------------------------------------------------------------------------------------------|---------|-------|-------|------|
| R9PXN4 | Alpha-actinin-1 (Fragment) OS=Gallus gallus GN=ACTN1 PE=4 SV=1 - [R9PXN4_CHICK]                   | 822.90  | 1.043 | 101.8 | 5.38 |
| Q6XFR0 | CD47 glycoprotein isoform B OS=Gallus gallus GN=CD47 PE=2 SV=1 - [Q6XFR0_CHICK]                   | 0.00    | 1.043 | 33.2  | 8.28 |
| F1NJ40 | ATP-dependent RNA helicase DDX42 OS=Gallus gallus GN=DDX42 PE=4 SV=2 - [F1NJ40_CHICK]             | 35.18   | 1.042 | 103.0 | 6.76 |
| Q5ZJW4 | Vesicle-trafficking protein SEC22b OS=Gallus gallus GN=SEC22B PE=2 SV=1 - [SC22B_CHICK]           | 197.04  | 1.042 | 24.7  | 8.72 |
| R4GHN5 | Drebrin (Fragment) OS=Gallus gallus GN=DBN1 PE=4 SV=1 - [R4GHN5_CHICK]                            | 158.16  | 1.042 | 61.3  | 4.55 |
| Q5ZM18 | Nucleolar GTP-binding protein 1 OS=Gallus gallus GN=GTPBP4 PE=2 SV=1 - [Q5ZM18_CHICK]             | 28.91   | 1.042 | 73.9  | 9.52 |
| F1NG39 | Unconventional myosin-Ic OS=Gallus gallus GN=MYO1C PE=4 SV=1 - [F1NG39_CHICK]                     | 380.28  | 1.042 | 118.8 | 9.16 |
| Q08705 | Transcriptional repressor CTCF OS=Gallus gallus GN=CTCF PE=1 SV=1 - [CTCF_CHICK]                  | 0.00    | 1.041 | 82.8  | 6.86 |
| H9L3J2 | U4/U6 small nuclear ribonucleoprotein Prp3 OS=Gallus gallus GN=PRPF3 PE=4 SV=1 - [H9L3J2_CHICK]   | 68.05   | 1.041 | 77.3  | 9.54 |
| Q9W719 | Hypoxanthine-guanine phosphoribosyltransferase OS=Gallus gallus GN=HPRT1 PE=2 SV=1 - [HPRT_CHICK] | 185.88  | 1.041 | 24.6  | 7.42 |
| E1C502 | Autophagy-related protein 3 OS=Gallus gallus GN=ATG3 PE=3 SV=1 - [E1C502_CHICK]                   | 0.00    | 1.041 | 35.6  | 4.72 |
| Q5F384 | Protein YIPF3 OS=Gallus gallus GN=YIPF3 PE=2 SV=1 - [YIPF3_CHICK]                                 | 25.29   | 1.041 | 36.9  | 5.34 |
| Q7SX63 | Heat shock protein 70 OS=Gallus gallus GN=HSP70 PE=3 SV=1 - [Q7SX63_CHICK]                        | 1189.15 | 1.041 | 69.9  | 5.86 |
| P42558 | GTP-binding nuclear protein Ran OS=Gallus gallus GN=RAN PE=2 SV=1 - [RAN_CHICK]                   | 132.74  | 1.041 | 24.4  | 7.88 |

|        |                                                                                                                     |         |       |       |      |
|--------|---------------------------------------------------------------------------------------------------------------------|---------|-------|-------|------|
| P11501 | Heat shock protein HSP 90-alpha OS=Gallus gallus GN=HSP90AA1 PE=3 SV=3 - [HS90A_CHICK]                              | 1260.43 | 1.040 | 84.0  | 5.08 |
| E1BUM7 | Alpha-(1,6)-fucosyltransferase OS=Gallus gallus GN=FUT8 PE=3 SV=1 - [E1BUM7_CHICK]                                  | 0.00    | 1.040 | 66.3  | 7.05 |
| Q5ZKY9 | Mediator of RNA polymerase II transcription subunit 20 OS=Gallus gallus GN=MED20 PE=2 SV=1 - [MED20_CHICK]          | 0.00    | 1.039 | 23.3  | 6.96 |
| R4GMG2 | Ribosome biogenesis protein BOP1 OS=Gallus gallus GN=BOP1 PE=3 SV=1 - [R4GMG2_CHICK]                                | 0.00    | 1.039 | 74.0  | 8.57 |
| F1NQU7 | Eukaryotic translation initiation factor 4 gamma 2 (Fragment) OS=Gallus gallus GN=EIF4G2 PE=4 SV=1 - [F1NQU7_CHICK] | 92.22   | 1.039 | 97.5  | 7.02 |
| F1P4Y3 | Serine/threonine-protein kinase 4 OS=Gallus gallus GN=STK4 PE=4 SV=1 - [F1P4Y3_CHICK]                               | 0.00    | 1.039 | 55.4  | 5.11 |
| F1NBT0 | Serine/threonine-protein kinase 10 OS=Gallus gallus GN=STK10 PE=3 SV=2 - [STK10_CHICK]                              | 0.00    | 1.038 | 112.4 | 7.42 |
| Q90734 | Alpha-actinin-4 OS=Gallus gallus GN=ACTN4 PE=1 SV=1 - [ACTN4_CHICK]                                                 | 705.36  | 1.038 | 104.1 | 5.26 |
| E1C1D1 | Annexin OS=Gallus gallus GN=ANXA7 PE=3 SV=2 - [E1C1D1_CHICK]                                                        | 81.85   | 1.038 | 49.3  | 5.91 |
| P17785 | Annexin A2 OS=Gallus gallus GN=ANXA2 PE=1 SV=2 - [ANXA2_CHICK]                                                      | 803.51  | 1.038 | 38.6  | 7.33 |
| P24367 | Peptidyl-prolyl cis-trans isomerase B OS=Gallus gallus GN=PPIB PE=2 SV=1 - [PPIB_CHICK]                             | 237.29  | 1.038 | 22.4  | 9.39 |
| F1NZP0 | Twinfilin-2 (Fragment) OS=Gallus gallus GN=TWF2 PE=4 SV=2 - [F1NZP0_CHICK]                                          | 99.21   | 1.038 | 39.1  | 6.55 |
| P23007 | Citrate synthase, mitochondrial OS=Gallus gallus GN=CS PE=1 SV=1 - [CISY_CHICK]                                     | 94.28   | 1.037 | 47.3  | 8.22 |

|        |                                                                                                                     |        |       |       |      |
|--------|---------------------------------------------------------------------------------------------------------------------|--------|-------|-------|------|
| F1P165 | Palmitoyltransferase (Fragment) OS=Gallus gallus GN=ZDHHC20 PE=3 SV=2 - [F1P165_CHICK]                              | 0.00   | 1.037 | 41.6  | 7.55 |
| I7LRG5 | HN1 OS=Gallus gallus GN=HN1 PE=2 SV=1 - [I7LRG5_CHICK]                                                              | 21.43  | 1.037 | 16.1  | 4.91 |
| F1NXK0 | Mini-chromosome maintenance complex-binding protein OS=Gallus gallus GN=MCMBP PE=4 SV=2 - [F1NXK0_CHICK]            | 61.35  | 1.037 | 67.6  | 5.29 |
| F7BWA2 | Signal transducer and activator of transcription OS=Gallus gallus GN=STAT1 PE=3 SV=1 - [F7BWA2_CHICK]               | 49.75  | 1.036 | 86.4  | 7.75 |
| F1NWF6 | Asparagine synthetase OS=Gallus gallus GN=ASNS PE=4 SV=1 - [F1NWF6_CHICK]                                           | 258.56 | 1.036 | 64.0  | 6.77 |
| Q5ZLP8 | Insulin-like growth factor 2 mRNA-binding protein 3 OS=Gallus gallus GN=IGF2BP3 PE=2 SV=1 - [IF2B3_CHICK]           | 158.92 | 1.036 | 64.3  | 8.94 |
| F1NTY0 | Zinc finger CCCH domain-containing protein 14 OS=Gallus gallus GN=ZC3H14 PE=4 SV=2 - [F1NTY0_CHICK]                 | 42.31  | 1.035 | 81.6  | 7.36 |
| E1BYT4 | Phosphatidylinositol 3-kinase OS=Gallus gallus PE=3 SV=2 - [E1BYT4_CHICK]                                           | 27.54  | 1.035 | 105.9 | 7.05 |
| Q8QGH2 | Small ubiquitin-related modifier 1 OS=Gallus gallus GN=SUMO1 PE=3 SV=1 - [SUMO1_CHICK]                              | 50.89  | 1.034 | 11.5  | 5.52 |
| Q789A6 | Nonmuscle myosin heavy chain OS=Gallus gallus GN=MYH10 PE=2 SV=1 - [Q789A6_CHICK]                                   | 683.47 | 1.034 | 228.9 | 5.50 |
| E1C494 | 60S ribosome subunit biogenesis protein NIP7 homolog (Fragment) OS=Gallus gallus GN=NIP7 PE=3 SV=2 - [E1C494_CHICK] | 0.00   | 1.034 | 21.1  | 9.39 |



|        |                                                                                                                       |        |       |      |       |
|--------|-----------------------------------------------------------------------------------------------------------------------|--------|-------|------|-------|
| Q90838 | Leucine zipper protein OS=Gallus gallus GN=PTRF PE=2 SV=1 - [Q90838_CHICK]                                            | 450.33 | 1.034 | 41.3 | 5.64  |
| F1N8Q2 | Microtubule-associated protein RP/EB family member 2 (Fragment) OS=Gallus gallus GN=MAPRE2 PE=4 SV=2 - [F1N8Q2_CHICK] | 95.13  | 1.033 | 33.6 | 6.24  |
| F1N833 | Prohibitin-2 (Fragment) OS=Gallus gallus GN=PHB2 PE=4 SV=2 - [F1N833_CHICK]                                           | 115.77 | 1.033 | 30.6 | 9.74  |
| F1NYI3 | tRNA-splicing ligase RtcB homolog OS=Gallus gallus GN=C1H22orf28 PE=3 SV=2 - [F1NYI3_CHICK]                           | 193.32 | 1.033 | 55.2 | 7.24  |
| F1P0P4 | Signal recognition particle subunit SRP68 OS=Gallus gallus GN=SRP68 PE=3 SV=1 - [F1P0P4_CHICK]                        | 69.84  | 1.033 | 68.8 | 8.43  |
| F1NLW5 | Casein kinase I isoform epsilon OS=Gallus gallus GN=CSNK1E PE=4 SV=2 - [F1NLW5_CHICK]                                 | 33.92  | 1.033 | 47.0 | 9.79  |
| F1NZ25 | Eukaryotic translation initiation factor 3 subunit B OS=Gallus gallus GN=EIF3B PE=3 SV=2 - [F1NZ25_CHICK]             | 138.81 | 1.033 | 85.6 | 5.11  |
| Q56I99 | Mothers against decapentaplegic homolog 5 OS=Gallus gallus GN=SMAD5 PE=2 SV=1 - [SMAD5_CHICK]                         | 0.00   | 1.033 | 52.2 | 7.71  |
| E1BUM0 | Peptidyl-prolyl cis-trans isomerase E OS=Gallus gallus GN=PPIE PE=3 SV=1 - [E1BUM0_CHICK]                             | 38.06  | 1.033 | 33.3 | 5.60  |
| F1NCI6 | 60S ribosomal protein L7 (Fragment) OS=Gallus gallus GN=RPL7 PE=3 SV=1 - [F1NCI6_CHICK]                               | 268.65 | 1.032 | 28.7 | 10.83 |
| Q5ZHX1 | Ras-related protein Rap-1b OS=Gallus gallus GN=RAP1B PE=2 SV=1 - [RAP1B_CHICK]                                        | 68.11  | 1.032 | 20.8 | 5.78  |
| I6L4M8 | Phosphatase and actin regulator OS=Gallus gallus GN=PHACTR4 PE=3 SV=2 - [I6L4M8_CHICK]                                | 33.44  | 1.032 | 78.2 | 6.96  |
| F1NDH1 | Arginyl-tRNA--protein transferase 1 OS=Gallus gallus GN=ATE1 PE=3 SV=1 - [F1NDH1_CHICK]                               | 20.49  | 1.032 | 54.9 | 7.14  |

|        |                                                                                                           |        |       |       |       |
|--------|-----------------------------------------------------------------------------------------------------------|--------|-------|-------|-------|
| E1C8R1 | Probable ATP-dependent RNA helicase DDX6 OS=Gallus gallus GN=DDX6 PE=4 SV=1 - [E1C8R1_CHICK]              | 86.47  | 1.032 | 54.4  | 8.78  |
| F1NEB4 | Protein transport protein Sec31A OS=Gallus gallus GN=SEC31A PE=4 SV=2 - [F1NEB4_CHICK]                    | 123.55 | 1.032 | 133.2 | 6.28  |
| F1NCN0 | Transcription factor AP-1 OS=Gallus gallus GN=JUN PE=4 SV=1 - [F1NCN0_CHICK]                              | 55.99  | 1.032 | 34.4  | 8.75  |
| E1BSS3 | Eukaryotic translation initiation factor 3 subunit A OS=Gallus gallus GN=EIF3A PE=3 SV=1 - [E1BSS3_CHICK] | 321.63 | 1.031 | 163.2 | 7.15  |
| Q9PV94 | Small nuclear ribonucleoprotein-associated protein B' OS=Gallus gallus GN=SNRPB PE=2 SV=1 - [RSMB_CHICK]  | 98.51  | 1.031 | 24.6  | 11.19 |
| Q5ZL77 | Synembryn-A OS=Gallus gallus GN=RIC8A PE=2 SV=1 - [RIC8A_CHICK]                                           | 48.11  | 1.031 | 61.5  | 5.25  |
| Q5F464 | Lipoma-preferred partner homolog OS=Gallus gallus GN=LPP PE=2 SV=1 - [LPP_CHICK]                          | 128.39 | 1.030 | 65.1  | 7.50  |
| F1P375 | Raftlin OS=Gallus gallus GN=RFTN1 PE=4 SV=1 - [F1P375_CHICK]                                              | 27.93  | 1.030 | 65.6  | 5.44  |
| Q5ZLW3 | Dymedin OS=Gallus gallus GN=DYM PE=2 SV=1 - [DYM_CHICK]                                                   | 0.00   | 1.030 | 76.1  | 6.07  |
| E1C878 | Glucosamine-6-phosphate deaminase 2 isoform 1 OS=Gallus gallus GN=GNPDA2 PE=2 SV=1 - [E1C878_CHICK]       | 0.00   | 1.029 | 31.1  | 6.60  |
| A0SVH2 | Tyrosine-protein kinase transmembrane receptor OS=Gallus gallus GN=ROR2 PE=2 SV=1 - [A0SVH2_CHICK]        | 0.00   | 1.029 | 104.5 | 6.42  |
| Q6VN51 | Protein phosphatase 3 regulatory subunit B alpha isoform type 1 OS=Gallus gallus GN=PPP3R1 PE=2 SV=1      | 48.27  | 1.029 | 19.3  | 4.81  |

|        |                                                                                                            |        |       |       |      |
|--------|------------------------------------------------------------------------------------------------------------|--------|-------|-------|------|
|        | - [Q6VN51_CHICK]                                                                                           |        |       |       |      |
| Q5ZK03 | Protein transport protein Sec23A OS=Gallus gallus GN=SEC23A PE=2 SV=1 - [SC23A_CHICK]                      | 120.41 | 1.029 | 86.2  | 6.79 |
| E1C6Q1 | Pachytene checkpoint protein 2 homolog OS=Gallus gallus GN=TRIP13 PE=3 SV=1 - [PCH2_CHICK]                 | 17.59  | 1.029 | 49.0  | 6.30 |
| F1NED5 | X-ray repair cross-complementing protein 5 (Fragment) OS=Gallus gallus GN=XRCC6 PE=4 SV=2 - [F1NED5_CHICK] | 89.08  | 1.029 | 71.2  | 6.15 |
| E1C9F6 | Neurofibromin OS=Gallus gallus GN=NF1 PE=4 SV=1 - [E1C9F6_CHICK]                                           | 26.64  | 1.029 | 319.6 | 7.50 |
| F1P3Q0 | Nuclear distribution protein nudE-like 1 OS=Gallus gallus GN=NDEL1 PE=4 SV=2 - [F1P3Q0_CHICK]              | 56.60  | 1.029 | 37.0  | 5.38 |
| O42484 | 17-beta-hydroxysteroid dehydrogenase type IV OS=Gallus gallus GN=HSD17B4 PE=2 SV=1 - [O42484_CHICK]        | 193.35 | 1.028 | 80.1  | 8.37 |
| Q8UWC5 | Nuclear protein matrin 3 OS=Gallus gallus GN=MATR3 PE=2 SV=1 - [Q8UWC5_CHICK]                              | 206.08 | 1.028 | 100.7 | 6.15 |
| Q5ZJV9 | CCR4-NOT transcription complex subunit 7 OS=Gallus gallus GN=CNOT7 PE=2 SV=1 - [CNOT7_CHICK]               | 0.00   | 1.028 | 32.7  | 4.84 |
| F1N9J4 | 60S ribosomal protein L22 (Fragment) OS=Gallus gallus GN=RPL22 PE=4 SV=1 - [F1N9J4_CHICK]                  | 206.19 | 1.028 | 14.6  | 9.19 |
| Q679P3 | PDZ and LIM domain protein 7 OS=Gallus gallus GN=PDLIM7 PE=1 SV=1 - [PDLI7_CHICK]                          | 57.94  | 1.027 | 45.7  | 8.70 |
| Q5ZIP6 | OTU domain-containing protein 6B OS=Gallus gallus GN=OTUD6B PE=2 SV=1 - [OTU6B_CHICK]                      | 29.09  | 1.027 | 34.5  | 6.30 |
| D2D3P4 | Rab27a OS=Gallus gallus GN=Rab27a PE=2 SV=1 - [D2D3P4_CHICK]                                               | 76.73  | 1.027 | 25.1  | 5.36 |

|        |                                                                                                              |         |       |       |      |
|--------|--------------------------------------------------------------------------------------------------------------|---------|-------|-------|------|
| Q5ZML3 | Serine/arginine-rich splicing factor 1 OS=Gallus gallus GN=SRSF1 PE=1 SV=3 - [SRSF1_CHICK]                   | 346.63  | 1.027 | 28.0  | 6.95 |
| F1NQS2 | Glutathione S-transferase OS=Gallus gallus GN=LOC396380 PE=3 SV=1 - [F1NQS2_CHICK]                           | 58.54   | 1.027 | 26.3  | 9.03 |
| E1C006 | Proteasome subunit alpha type OS=Gallus gallus GN=PSMA2 PE=3 SV=1 - [E1C006_CHICK]                           | 66.92   | 1.027 | 25.9  | 7.49 |
| F1NE72 | Lysine--tRNA ligase OS=Gallus gallus GN=KARS PE=3 SV=1 - [F1NE72_CHICK]                                      | 113.71  | 1.026 | 67.8  | 6.23 |
| P84173 | Prohibitin OS=Gallus gallus GN=PHB PE=1 SV=1 - [PHB_CHICK]                                                   | 279.16  | 1.026 | 29.9  | 5.76 |
| F1P394 | DNA ligase OS=Gallus gallus GN=LIG3 PE=3 SV=2 - [F1P394_CHICK]                                               | 34.45   | 1.025 | 101.2 | 8.79 |
| F1P2T2 | NADPH--cytochrome P450 reductase OS=Gallus gallus GN=POR PE=3 SV=2 - [F1P2T2_CHICK]                          | 145.16  | 1.025 | 76.9  | 5.60 |
| Q5ZKC9 | 14-3-3 protein zeta OS=Gallus gallus GN=YWHAZ PE=2 SV=1 - [1433Z_CHICK]                                      | 661.87  | 1.025 | 27.8  | 4.79 |
| F1NYQ3 | Non-lysosomal glucosylceramidase OS=Gallus gallus GN=LOC100859407 PE=3 SV=2 - [F1NYQ3_CHICK]                 | 59.47   | 1.025 | 96.0  | 6.40 |
| P00368 | Glutamate dehydrogenase 1, mitochondrial OS=Gallus gallus GN=GLUD1 PE=1 SV=1 - [DHE3_CHICK]                  | 345.53  | 1.025 | 55.7  | 8.28 |
| E1C3Y5 | Protein transport protein Sec23A OS=Gallus gallus GN=SEC23A PE=4 SV=1 - [E1C3Y5_CHICK]                       | 98.48   | 1.025 | 86.1  | 6.96 |
| E1BVT3 | Malate dehydrogenase OS=Gallus gallus GN=MDH2 PE=3 SV=1 - [E1BVT3_CHICK]                                     | 1291.26 | 1.024 | 35.6  | 8.56 |
| F1NRM8 | Endoplasmic reticulum resident protein 29 (Fragment) OS=Gallus gallus GN=ERP29 PE=4 SV=2 -<br>[F1NRM8_CHICK] | 207.13  | 1.024 | 29.1  | 8.22 |
| F1NSQ4 | Mitochondrial Rho GTPase OS=Gallus gallus GN=RHOT1 PE=3 SV=1 - [F1NSQ4_CHICK]                                | 51.22   | 1.024 | 70.8  | 6.15 |

|        |                                                                                                         |         |       |       |       |
|--------|---------------------------------------------------------------------------------------------------------|---------|-------|-------|-------|
| Q6IVA4 | Ubiquitin-like modifier-activating enzyme 5 OS=Gallus gallus GN=UBA5 PE=2 SV=1 - [UBA5_CHICK]           | 29.64   | 1.024 | 44.1  | 4.84  |
| F1NWP3 | Heat shock cognate 71 kDa protein OS=Gallus gallus GN=HSPA8 PE=3 SV=1 - [F1NWP3_CHICK]                  | 1443.98 | 1.024 | 70.8  | 5.52  |
| Q5ZJJ8 | Ubiquitin-like domain-containing CTD phosphatase 1 OS=Gallus gallus GN=UBLCP1 PE=2 SV=1 - [UBCP1_CHICK] | 0.00    | 1.024 | 36.8  | 6.37  |
| Q5F4B2 | Switch-associated protein 70 OS=Gallus gallus GN=SWAP70 PE=2 SV=1 - [SWP70_CHICK]                       | 39.60   | 1.024 | 68.4  | 6.34  |
| F1NNL1 | Transmembrane protein 231 OS=Gallus gallus GN=TMEM231 PE=3 SV=2 - [TM231_CHICK]                         | 0.00    | 1.024 | 36.5  | 9.33  |
| F1NJT2 | Tyrosine-protein kinase receptor (Fragment) OS=Gallus gallus GN=INSR PE=3 SV=2 - [F1NJT2_CHICK]         | 0.00    | 1.024 | 153.3 | 6.14  |
| Q5ZLC9 | Golgin subfamily A member 7 OS=Gallus gallus GN=GOLGA7 PE=2 SV=1 - [GOGA7_CHICK]                        | 93.14   | 1.023 | 15.8  | 7.05  |
| E1BWX1 | Annexin OS=Gallus gallus GN=ANXA6 PE=3 SV=2 - [E1BWX1_CHICK]                                            | 718.62  | 1.023 | 86.9  | 6.32  |
| P67966 | Cysteine and glycine-rich protein 1 OS=Gallus gallus GN=CSRP1 PE=1 SV=2 - [CSRP1_CHICK]                 | 78.94   | 1.023 | 20.4  | 8.57  |
| P98152 | Transcription factor p65 OS=Gallus gallus GN=RELA PE=1 SV=1 - [TF65_CHICK]                              | 33.80   | 1.022 | 60.0  | 5.94  |
| F2Z4L5 | 60S ribosomal protein L7a (Fragment) OS=Gallus gallus GN=RPL7A PE=4 SV=1 - [F2Z4L5_CHICK]               | 677.44  | 1.022 | 29.8  | 10.51 |
| Q8UVC3 | Inversin OS=Gallus gallus GN=INVS PE=2 SV=2 - [INVS_CHICK]                                              | 0.00    | 1.022 | 122.5 | 9.16  |
| Q8AWB8 | Cohesin complex subunit OS=Gallus gallus GN=SMC3 PE=2 SV=1 - [Q8AWB8_CHICK]                             | 118.33  | 1.022 | 141.5 | 7.06  |
| Q90835 | Elongation factor 1-alpha 1 OS=Gallus gallus GN=EEF1A PE=2 SV=1 - [EF1A_CHICK]                          | 1710.40 | 1.022 | 50.1  | 9.01  |

|        |                                                                                                          |         |       |       |      |
|--------|----------------------------------------------------------------------------------------------------------|---------|-------|-------|------|
| E1BTY4 | Sorting nexin OS=Gallus gallus GN=SNX9 PE=3 SV=1 - [E1BTY4_CHICK]                                        | 98.07   | 1.022 | 67.1  | 5.58 |
| F1NC77 | NEDD4-binding protein 1 OS=Gallus gallus GN=N4BP1 PE=4 SV=1 - [F1NC77_CHICK]                             | 0.00    | 1.022 | 103.9 | 6.38 |
| Q5ZMP6 | AP-2 complex subunit mu OS=Gallus gallus GN=AP2M1 PE=2 SV=1 - [AP2M1_CHICK]                              | 79.25   | 1.022 | 49.4  | 9.54 |
| P63283 | SUMO-conjugating enzyme UBC9 OS=Gallus gallus GN=UBE2I PE=2 SV=1 - [UBC9_CHICK]                          | 83.15   | 1.022 | 18.0  | 8.66 |
| H9L340 | ATP synthase subunit beta (Fragment) OS=Gallus gallus GN=ATP5B PE=3 SV=2 - [H9L340_CHICK]                | 1517.98 | 1.021 | 52.9  | 5.21 |
| F1NMV4 | ATP-dependent RNA helicase SUPV3L1, mitochondrial OS=Gallus gallus GN=SUPV3L1 PE=4 SV=1 - [F1NMV4_CHICK] | 0.00    | 1.021 | 88.7  | 8.06 |
| Q5ZKV4 | Cytosolic Fe-S cluster assembly factor NUBP2 OS=Gallus gallus GN=NUBP2 PE=2 SV=1 - [NUBP2_CHICK]         | 77.54   | 1.021 | 29.3  | 6.07 |
| E1BRJ9 | Coronin OS=Gallus gallus GN=CORO7 PE=3 SV=2 - [E1BRJ9_CHICK]                                             | 0.00    | 1.021 | 100.0 | 5.76 |
| O73664 | MSSP-1 OS=Gallus gallus GN=RBMS1 PE=2 SV=1 - [O73664_CHICK]                                              | 191.07  | 1.020 | 40.6  | 8.35 |
| H9L1C2 | Transaldolase OS=Gallus gallus GN=TALDO1 PE=3 SV=2 - [H9L1C2_CHICK]                                      | 120.55  | 1.020 | 37.6  | 7.47 |
| Q5ZL19 | Syntaxin-6 OS=Gallus gallus GN=STX6 PE=2 SV=1 - [STX6_CHICK]                                             | 28.37   | 1.020 | 29.1  | 4.93 |
| P43347 | Translationally-controlled tumor protein homolog OS=Gallus gallus GN=TPT1 PE=2 SV=1 - [TCTP_CHICK]       | 0.00    | 1.020 | 19.5  | 5.00 |
| H9KZF8 | ATP synthase subunit gamma OS=Gallus gallus GN=ATP5C1 PE=3 SV=2 - [H9KZF8_CHICK]                         | 205.73  | 1.020 | 32.7  | 9.44 |

|          |                                                                                                               |         |       |       |       |
|----------|---------------------------------------------------------------------------------------------------------------|---------|-------|-------|-------|
| Q98932   | Ras-related protein Rab-5C OS=Gallus gallus GN=RAB5C PE=1 SV=1 - [RAB5C_CHICK]                                | 328.48  | 1.020 | 23.5  | 8.41  |
| E1BYW9   | Proteasome subunit beta type OS=Gallus gallus GN=PSMB3 PE=3 SV=1 - [E1BYW9_CHICK]                             | 151.41  | 1.020 | 23.1  | 5.41  |
| Q5ZK63   | Activated RNA polymerase II transcriptional coactivator p15 OS=Gallus gallus GN=SUB1 PE=2 SV=1 - [TCP4_CHICK] | 76.76   | 1.020 | 14.2  | 9.57  |
| P15143   | POU domain, class 2, transcription factor 1 OS=Gallus gallus GN=POU2F1 PE=2 SV=1 - [PO2F1_CHICK]              | 45.93   | 1.019 | 75.9  | 7.18  |
| Q98TF6   | 60S ribosomal protein L36 OS=Gallus gallus GN=RPL36 PE=3 SV=1 - [RL36_CHICK]                                  | 49.72   | 1.019 | 12.3  | 11.34 |
| E1BZR9   | Tectonin beta-propeller repeat-containing protein 1 OS=Gallus gallus GN=TECPR1 PE=3 SV=1 - [TCPR1_CHICK]      | 0.00    | 1.019 | 131.7 | 6.11  |
| Q5F371   | Protein strawberry notch homolog 1 OS=Gallus gallus GN=SBNO1 PE=2 SV=1 - [SBNO1_CHICK]                        | 44.27   | 1.019 | 137.1 | 6.48  |
| Q5F398   | Macrophage erythroblast attacher OS=Gallus gallus GN=MAEA PE=2 SV=1 - [MAEA_CHICK]                            | 0.00    | 1.019 | 45.4  | 8.59  |
| F1NC02   | Proteasome subunit alpha type OS=Gallus gallus GN=PSMA4 PE=3 SV=2 - [F1NC02_CHICK]                            | 86.05   | 1.019 | 29.5  | 7.33  |
| F2Z4K7   | 40S ribosomal protein S3a OS=Gallus gallus GN=RPS3A PE=3 SV=1 - [F2Z4K7_CHICK]                                | 145.07  | 1.019 | 29.8  | 9.72  |
| Q5ZL12   | Protein phosphatase 1 regulatory subunit 21 OS=Gallus gallus GN=PPP1R21 PE=2 SV=1 - [PPR21_CHICK]             | 0.00    | 1.019 | 88.8  | 7.83  |
| P12003-1 | Isoform 1 of Vinculin OS=Gallus gallus GN=VCL - [VINC_CHICK]                                                  | 1523.89 | 1.018 | 116.9 | 6.33  |

|        |                                                                                                                                   |         |       |       |       |
|--------|-----------------------------------------------------------------------------------------------------------------------------------|---------|-------|-------|-------|
| Q5ZLH9 | Protein CDV3 homolog OS=Gallus gallus GN=CDV3 PE=2 SV=1 - [CDV3_CHICK]                                                            | 85.71   | 1.018 | 21.6  | 5.02  |
| R4GKF3 | Alpha-1,3-mannosyl-glycoprotein 4-beta-N-acetylglucosaminyltransferase C OS=Gallus gallus<br>GN=MGAT4C PE=4 SV=1 - [R4GKF3_CHICK] | 0.00    | 1.018 | 56.7  | 8.06  |
| F1N9F8 | Alcohol dehydrogenase [NADP(+)] OS=Gallus gallus GN=AKR1A1 PE=4 SV=1 - [F1N9F8_CHICK]                                             | 67.65   | 1.018 | 37.1  | 7.80  |
| Q5ZML5 | Protein LSM12 homolog OS=Gallus gallus GN=LSM12 PE=2 SV=1 - [LSM12_CHICK]                                                         | 45.90   | 1.018 | 21.5  | 7.69  |
| P13648 | Lamin-A OS=Gallus gallus GN=LMNA PE=2 SV=1 - [LMNA_CHICK]                                                                         | 2150.18 | 1.018 | 73.1  | 6.95  |
| Q07659 | Fibroblast growth factor OS=Gallus gallus GN=bFGF PE=2 SV=1 - [Q07659_CHICK]                                                      | 53.18   | 1.018 | 16.2  | 9.72  |
| F1NY05 | Hypoxia up-regulated protein 1 (Fragment) OS=Gallus gallus GN=HYOU1 PE=3 SV=2 - [F1NY05_CHICK]                                    | 455.92  | 1.018 | 108.3 | 5.17  |
| Q5ZKI0 | Calcium/calmodulin-dependent protein kinase type II delta chain OS=Gallus gallus GN=CAMK2D PE=2<br>SV=1 - [KCC2D_CHICK]           | 92.62   | 1.018 | 54.2  | 7.12  |
| P41125 | 60S ribosomal protein L13 OS=Gallus gallus GN=RPL13 PE=2 SV=2 - [RL13_CHICK]                                                      | 157.34  | 1.017 | 24.4  | 11.75 |
| Q5ZLH4 | Transmembrane protein 230 OS=Gallus gallus GN=TMEM230 PE=2 SV=1 - [TM230_CHICK]                                                   | 0.00    | 1.017 | 13.2  | 9.28  |
| E1C8Z0 | Dolichyl-diphosphooligosaccharide--protein glycosyltransferase subunit 2 OS=Gallus gallus GN=RPN2<br>PE=4 SV=2 - [E1C8Z0_CHICK]   | 48.78   | 1.017 | 68.8  | 6.32  |
| P00523 | Proto-oncogene tyrosine-protein kinase Src OS=Gallus gallus GN=SRC PE=1 SV=4 - [SRC_CHICK]                                        | 37.06   | 1.017 | 60.0  | 7.65  |



|          |                                                                                                                                             |        |       |       |      |
|----------|---------------------------------------------------------------------------------------------------------------------------------------------|--------|-------|-------|------|
| H9L082   | Bifunctional methylenetetrahydrofolate dehydrogenase/cyclohydrolase, mitochondrial OS=Gallus gallus<br>GN=MTHFD2 PE=3 SV=1 - [H9L082_CHICK] | 28.89  | 1.017 | 36.4  | 9.48 |
| P14731   | Lamin-B1 OS=Gallus gallus GN=LMNB1 PE=2 SV=1 - [LMNB1_CHICK]                                                                                | 172.48 | 1.017 | 66.5  | 5.20 |
| P02607   | Myosin light polypeptide 6 OS=Gallus gallus GN=MYL6 PE=1 SV=3 - [MYL6_CHICK]                                                                | 234.67 | 1.016 | 17.0  | 4.59 |
| E1C1R4   | Ubiquitin carboxyl-terminal hydrolase 47 OS=Gallus gallus GN=USP47 PE=3 SV=1 - [UBP47_CHICK]                                                | 90.82  | 1.016 | 157.1 | 5.12 |
| Q04584   | Zyxin OS=Gallus gallus GN=ZYX PE=1 SV=1 - [ZYX_CHICK]                                                                                       | 61.49  | 1.016 | 58.5  | 7.11 |
| E1C4M6   | Ubiquitin carboxyl-terminal hydrolase (Fragment) OS=Gallus gallus GN=USP14 PE=3 SV=2 -<br>[E1C4M6_CHICK]                                    | 138.74 | 1.016 | 56.7  | 5.20 |
| R4GFF8   | Mitogen-activated protein kinase 6 OS=Gallus gallus GN=MAPK6 PE=4 SV=1 - [R4GFF8_CHICK]                                                     | 0.00   | 1.016 | 79.6  | 5.15 |
| P04268-5 | Isoform 5 of Tropomyosin alpha-1 chain OS=Gallus gallus GN=TPM1 - [TPM1_CHICK]                                                              | 307.02 | 1.016 | 32.8  | 4.75 |
| F1NT50   | Protein sidekick-1 OS=Gallus gallus GN=SDK1 PE=4 SV=2 - [F1NT50_CHICK]                                                                      | 0.00   | 1.016 | 158.6 | 5.63 |
| Q9PVL6   | Mitochondrial carrier homolog 2 OS=Gallus gallus GN=Mtch2 PE=2 SV=1 - [Q9PVL6_CHICK]                                                        | 73.07  | 1.016 | 33.1  | 9.31 |
| Q5ZHY5   | STIP1 homology and U box-containing protein 1 OS=Gallus gallus GN=STUB1 PE=2 SV=1 -<br>[CHIP_CHICK]                                         | 64.04  | 1.015 | 35.6  | 6.38 |
| F1P1F4   | Putative ATP-dependent RNA helicase DHX30 OS=Gallus gallus GN=DHX30 PE=4 SV=1 -<br>[F1P1F4_CHICK]                                           | 38.24  | 1.015 | 137.7 | 7.96 |

|        |                                                                                                          |         |       |       |      |
|--------|----------------------------------------------------------------------------------------------------------|---------|-------|-------|------|
| F1NJ08 | Vimentin OS=Gallus gallus GN=VIM PE=3 SV=1 - [F1NJ08_CHICK]                                              | 2495.66 | 1.015 | 53.2  | 5.21 |
| F1P4D3 | Glutamine-dependent NAD(+) synthetase OS=Gallus gallus GN=NADSYN1 PE=4 SV=1 - [F1P4D3_CHICK]             | 0.00    | 1.015 | 79.2  | 6.92 |
| Q5ZIK2 | PDZ domain-containing protein 11 OS=Gallus gallus GN=PDZD11 PE=2 SV=1 - [PDZ11_CHICK]                    | 67.49   | 1.015 | 15.8  | 6.54 |
| Q5ZLX2 | Eukaryotic translation initiation factor 2 subunit 1 OS=Gallus gallus GN=EIF2S1 PE=2 SV=2 - [IF2A_CHICK] | 259.42  | 1.014 | 36.2  | 5.14 |
| Q5ZHW4 | Ras-related protein Rab-5B OS=Gallus gallus GN=RAB5B PE=2 SV=1 - [RAB5B_CHICK]                           | 214.75  | 1.014 | 23.6  | 8.13 |
| H9L0H1 | Transcription elongation factor SPT5 OS=Gallus gallus GN=SUPT5H PE=3 SV=2 - [H9L0H1_CHICK]               | 54.15   | 1.014 | 119.9 | 5.10 |
| H9KZI4 | Annexin OS=Gallus gallus PE=3 SV=2 - [H9KZI4_CHICK]                                                      | 518.06  | 1.014 | 36.0  | 5.34 |
| Q5ZKA4 | Eukaryotic translation initiation factor 3 subunit J OS=Gallus gallus GN=EIF3J PE=2 SV=1 - [EIF3J_CHICK] | 41.49   | 1.014 | 28.7  | 4.84 |
| P09244 | Tubulin beta-7 chain OS=Gallus gallus PE=2 SV=1 - [TBB7_CHICK]                                           | 932.17  | 1.014 | 49.6  | 4.89 |
| Q90828 | Cytoplasmic dynein 1 light intermediate chain 1 OS=Gallus gallus GN=DYNC1LI1 PE=1 SV=1 - [DC1L1_CHICK]   | 137.09  | 1.014 | 55.9  | 6.11 |
| Q90965 | Ras-related protein Rab-2A OS=Gallus gallus GN=RAB2A PE=2 SV=1 - [RAB2A_CHICK]                           | 107.02  | 1.013 | 23.5  | 6.39 |
| P25324 | Thiosulfate sulfurtransferase OS=Gallus gallus GN=TST PE=1 SV=1 - [THTR_CHICK]                           | 30.89   | 1.013 | 32.3  | 7.01 |

|        |                                                                                                               |         |       |       |      |
|--------|---------------------------------------------------------------------------------------------------------------|---------|-------|-------|------|
| P02552 | Tubulin alpha-1 chain (Fragment) OS=Gallus gallus PE=1 SV=1 - [TBA1_CHICK]                                    | 927.94  | 1.013 | 45.9  | 5.08 |
| Q5ZLL7 | WD repeat-containing protein 91 OS=Gallus gallus GN=WDR91 PE=2 SV=1 - [WDR91_CHICK]                           | 0.00    | 1.013 | 83.4  | 6.62 |
| F1NVQ6 | Charged multivesicular body protein 1b OS=Gallus gallus GN=CHMP1B PE=4 SV=1 - [F1NVQ6_CHICK]                  | 17.44   | 1.012 | 22.2  | 8.10 |
| Q5F3U9 | Sister chromatid cohesion protein PDS5 homolog B OS=Gallus gallus GN=PDS5B PE=2 SV=3 - [PDS5B_CHICK]          | 79.90   | 1.012 | 160.9 | 8.05 |
| Q5ZKN2 | Membrane-associated progesterone receptor component 1 OS=Gallus gallus GN=PGRMC1 PE=2 SV=3 - [PGRC1_CHICK]    | 34.01   | 1.012 | 21.3  | 4.81 |
| P24798 | Sodium/potassium-transporting ATPase subunit alpha-3 OS=Gallus gallus GN=ATP1A3 PE=2 SV=1 - [AT1A3_CHICK]     | 123.01  | 1.012 | 111.2 | 5.38 |
| Q5ZK88 | Paraspeckle component 1 OS=Gallus gallus GN=PSPC1 PE=2 SV=1 - [PSPC1_CHICK]                                   | 124.94  | 1.012 | 58.4  | 6.70 |
| P60706 | Actin, cytoplasmic 1 OS=Gallus gallus GN=ACTB PE=1 SV=1 - [ACTB_CHICK]                                        | 4027.53 | 1.011 | 41.7  | 5.48 |
| Q6B842 | Carnitine palmitoyltransferase I OS=Gallus gallus GN=CPT1A PE=2 SV=1 - [Q6B842_CHICK]                         | 26.42   | 1.011 | 87.8  | 8.44 |
| Q5ZJJ2 | Replication protein A 70 kDa DNA-binding subunit OS=Gallus gallus GN=RPA1 PE=2 SV=1 - [RFA1_CHICK]            | 107.01  | 1.011 | 68.0  | 7.85 |
| F1NGQ8 | Vacuolar ATPase assembly integral membrane protein VMA21 OS=Gallus gallus GN=VMA21 PE=4 SV=1 - [F1NGQ8_CHICK] | 53.59   | 1.011 | 11.5  | 7.24 |

|        |                                                                                                       |        |       |       |      |
|--------|-------------------------------------------------------------------------------------------------------|--------|-------|-------|------|
| R9PXN1 | Eukaryotic initiation factor 4A-II OS=Gallus gallus GN=EIF4A2 PE=4 SV=1 - [R9PXN1_CHICK]              | 400.78 | 1.011 | 43.5  | 5.48 |
| F6RX73 | Proteasome subunit beta type (Fragment) OS=Gallus gallus GN=PSMB7 PE=3 SV=1 - [F6RX73_CHICK]          | 56.86  | 1.010 | 28.1  | 6.40 |
| E1C612 | Structural maintenance of chromosomes protein OS=Gallus gallus GN=SMC2 PE=3 SV=2 - [E1C612_CHICK]     | 41.96  | 1.010 | 134.8 | 8.62 |
| Q07598 | Non-specific lipid-transfer protein (Fragment) OS=Gallus gallus GN=SCP2 PE=2 SV=1 - [NLTP_CHICK]      | 480.36 | 1.010 | 58.7  | 8.19 |
| E1C1E9 | Acyl-coenzyme A oxidase OS=Gallus gallus GN=ACOX3 PE=3 SV=2 - [E1C1E9_CHICK]                          | 24.09  | 1.010 | 79.9  | 7.72 |
| Q5ZIV5 | Programmed cell death protein 10 OS=Gallus gallus GN=PDCD10 PE=2 SV=1 - [PDC10_CHICK]                 | 29.66  | 1.010 | 24.7  | 8.19 |
| O13268 | Proteasome subunit alpha type-7 OS=Gallus gallus GN=PSMA7 PE=2 SV=1 - [PSA7_CHICK]                    | 57.10  | 1.010 | 28.1  | 8.84 |
| O93378 | Signal transducer and activator of transcription OS=Gallus gallus GN=Stat5 PE=2 SV=1 - [O93378_CHICK] | 37.68  | 1.009 | 90.0  | 6.32 |
| F1P4I9 | Proteasomal ubiquitin receptor ADRM1 OS=Gallus gallus GN=ADRM1 PE=4 SV=1 - [F1P4I9_CHICK]             | 25.13  | 1.009 | 42.2  | 5.15 |
| Q5ZK10 | NSFL1 cofactor p47 OS=Gallus gallus GN=NSFL1C PE=2 SV=1 - [NSF1C_CHICK]                               | 424.29 | 1.009 | 40.6  | 5.15 |
| F1NVF0 | Vacuolar protein sorting-associated protein 35 OS=Gallus gallus GN=VPS35 PE=3 SV=1 - [F1NVF0_CHICK]   | 123.48 | 1.009 | 91.7  | 5.58 |
| Q9IAY5 | Protein syndesmos OS=Gallus gallus GN=SDOS PE=1 SV=3 - [SDOS_CHICK]                                   | 290.14 | 1.009 | 33.3  | 6.13 |

|        |                                                                                                                         |        |       |       |      |
|--------|-------------------------------------------------------------------------------------------------------------------------|--------|-------|-------|------|
| Q5F414 | RNA-binding protein PNO1 OS=Gallus gallus GN=PNO1 PE=2 SV=1 - [PNO1_CHICK]                                              | 0.00   | 1.009 | 26.4  | 9.92 |
| H9KZ88 | Guanine nucleotide-binding protein G(i) subunit alpha-2 (Fragment) OS=Gallus gallus GN=GNAI2 PE=4 SV=2 - [H9KZ88_CHICK] | 182.67 | 1.008 | 39.0  | 5.76 |
| Q5ZL42 | Basic leucine zipper and W2 domain-containing protein 2 OS=Gallus gallus GN=BZW2 PE=2 SV=1 - [BZW2_CHICK]               | 51.12  | 1.008 | 47.8  | 8.27 |
| F1P382 | Vascular endothelial growth factor receptor 1 OS=Gallus gallus GN=FLT1 PE=3 SV=2 - [F1P382_CHICK]                       | 32.61  | 1.008 | 149.3 | 9.19 |
| F1P0Z7 | ADP-ribosylation factor-like protein 8A OS=Gallus gallus GN=ARL8A PE=3 SV=2 - [F1P0Z7_CHICK]                            | 62.79  | 1.007 | 21.5  | 8.43 |
| Q6JHU8 | Proyl 3-hydroxylase 1 OS=Gallus gallus GN=LEPRE1 PE=1 SV=1 - [P3H1_CHICK]                                               | 145.49 | 1.007 | 81.6  | 5.50 |
| F1NDU0 | Protein CASC4 OS=Gallus gallus GN=CASC4 PE=4 SV=1 - [F1NDU0_CHICK]                                                      | 70.46  | 1.007 | 42.5  | 6.15 |
| F1P1X9 | Casein kinase I isoform epsilon OS=Gallus gallus GN=DBT PE=3 SV=1 - [F1P1X9_CHICK]                                      | 40.25  | 1.007 | 54.1  | 8.56 |
| F1NIK7 | DNA-directed RNA polymerase OS=Gallus gallus GN=POLR3A PE=3 SV=1 - [F1NIK7_CHICK]                                       | 0.00   | 1.007 | 155.6 | 8.59 |
| E1C834 | Pericentriolar material 1 protein OS=Gallus gallus GN=PCM1 PE=4 SV=2 - [E1C834_CHICK]                                   | 0.00   | 1.007 | 222.4 | 5.05 |
| Q5ZKW2 | Protein LZIC OS=Gallus gallus GN=LZIC PE=2 SV=1 - [LZIC_CHICK]                                                          | 70.08  | 1.007 | 21.5  | 4.88 |
| Q5ZJV4 | Mini-chromosome maintenance complex-binding protein OS=Gallus gallus GN=MCMBP PE=2 SV=2 - [MCMBP_CHICK]                 | 62.71  | 1.007 | 71.9  | 5.64 |

|          |                                                                                                           |        |       |       |      |
|----------|-----------------------------------------------------------------------------------------------------------|--------|-------|-------|------|
| Q90ZK7   | Peptidyl-prolyl cis-trans isomerase OS=Gallus gallus GN=FKBP25 PE=2 SV=1 - [Q90ZK7_CHICK]                 | 319.21 | 1.006 | 25.0  | 9.19 |
| E1BSN7   | Phosphorylase OS=Gallus gallus GN=PYGB PE=3 SV=2 - [E1BSN7_CHICK]                                         | 56.03  | 1.006 | 96.7  | 6.44 |
| F1NLE6   | Oxysterol-binding protein (Fragment) OS=Gallus gallus GN=OSBPL9 PE=3 SV=2 - [F1NLE6_CHICK]                | 22.12  | 1.006 | 83.2  | 5.88 |
| Q5ZIP4   | 5'-3' exoribonuclease 2 OS=Gallus gallus GN=XRN2 PE=2 SV=1 - [XRN2_CHICK]                                 | 0.00   | 1.006 | 108.5 | 7.61 |
| F1NT44   | Translin OS=Gallus gallus GN=TSN PE=4 SV=1 - [F1NT44_CHICK]                                               | 56.91  | 1.006 | 26.0  | 6.71 |
| Q5ZLC7   | Microtubule-associated protein RP/EB family member 1 OS=Gallus gallus GN=MAPRE1 PE=2 SV=1 - [MARE1_CHICK] | 163.83 | 1.006 | 29.1  | 5.14 |
| F6SU00   | Annexin OS=Gallus gallus GN=ANXA11 PE=3 SV=1 - [F6SU00_CHICK]                                             | 60.49  | 1.006 | 52.7  | 8.41 |
| E1BXG0   | Peptidyl-prolyl cis-trans isomerase OS=Gallus gallus GN=PPIH PE=3 SV=1 - [E1BXG0_CHICK]                   | 54.56  | 1.006 | 19.2  | 8.07 |
| R4GJB9   | Receptor-type tyrosine-protein phosphatase eta OS=Gallus gallus GN=PTPRJ PE=4 SV=1 - [R4GJB9_CHICK]       | 0.00   | 1.006 | 130.1 | 4.97 |
| P17924-2 | Isoform 2 of Nuclear factor 1 B-type OS=Gallus gallus GN=NFIB - [NFIB_CHICK]                              | 0.00   | 1.006 | 47.4  | 8.88 |
| Q5F3T7-2 | Isoform 2 of CUGBP Elav-like family member 1 OS=Gallus gallus GN=CELF1 - [CELF1_CHICK]                    | 32.47  | 1.005 | 51.6  | 8.40 |
| F1NEF8   | NHL repeat-containing protein 2 OS=Gallus gallus GN=NHLRC2 PE=4 SV=2 - [F1NEF8_CHICK]                     | 0.00   | 1.005 | 79.5  | 5.96 |
| P17790-2 | Isoform 2 of Basigin OS=Gallus gallus GN=BSG - [BASI_CHICK]                                               | 133.12 | 1.005 | 29.2  | 6.40 |

|          |                                                                                                       |         |       |       |       |
|----------|-------------------------------------------------------------------------------------------------------|---------|-------|-------|-------|
| P57788   | Monocarboxylate transporter 4 OS=Gallus gallus GN=SLC16A3 PE=2 SV=1 - [MOT4_CHICK]                    | 79.67   | 1.005 | 51.0  | 7.39  |
| F1NKT5   | Transcription factor BTF3 homolog 4 OS=Gallus gallus GN=BTF3L4 PE=4 SV=1 - [F1NKT5_CHICK]             | 43.80   | 1.005 | 17.3  | 6.35  |
| F1NZ86   | Stress-70 protein, mitochondrial OS=Gallus gallus GN=HSPA9 PE=3 SV=1 - [F1NZ86_CHICK]                 | 1034.16 | 1.005 | 73.1  | 6.43  |
| P19352-2 | Isoform 2 of Tropomyosin beta chain OS=Gallus gallus GN=TPM2 - [TPM2_CHICK]                           | 211.59  | 1.005 | 32.8  | 4.69  |
| H9L0U6   | Proteasome subunit beta type OS=Gallus gallus GN=PSMB4 PE=3 SV=1 - [H9L0U6_CHICK]                     | 58.62   | 1.004 | 28.1  | 5.97  |
| Q08200   | 60S ribosomal protein L10 (Fragment) OS=Gallus gallus GN=RPL10 PE=2 SV=1 - [RL10_CHICK]               | 113.82  | 1.004 | 24.0  | 10.13 |
| F1NGA2   | ATP synthase subunit alpha OS=Gallus gallus GN=ATP5A1W PE=3 SV=2 - [F1NGA2_CHICK]                     | 697.85  | 1.004 | 60.0  | 8.97  |
| F1NG89   | Ubiquitin carboxyl-terminal hydrolase (Fragment) OS=Gallus gallus GN=USP10 PE=3 SV=2 - [F1NG89_CHICK] | 91.81   | 1.004 | 85.7  | 5.05  |
| Q5ZIK9   | Coatomer subunit epsilon OS=Gallus gallus GN=COPE PE=2 SV=1 - [COPE_CHICK]                            | 163.44  | 1.004 | 34.3  | 5.14  |
| Q5ZKD5   | RRP12-like protein OS=Gallus gallus GN=RRP12 PE=2 SV=1 - [RRP12_CHICK]                                | 51.87   | 1.004 | 144.0 | 8.32  |
| F1NV49   | ATP-dependent RNA helicase DDX1 OS=Gallus gallus GN=DDX1 PE=4 SV=2 - [F1NV49_CHICK]                   | 142.17  | 1.003 | 81.8  | 7.27  |
| F1N868   | Tyrosine-protein kinase receptor OS=Gallus gallus GN=PDGFRB PE=3 SV=2 - [F1N868_CHICK]                | 24.64   | 1.003 | 119.2 | 5.43  |
| Q9YH06   | High mobility group protein B1 OS=Gallus gallus GN=HMGB1 PE=1 SV=1 - [HMGB1_CHICK]                    | 287.11  | 1.003 | 24.9  | 5.74  |
| Q9IAR7   | TvbS1 OS=Gallus gallus GN=tvb PE=2 SV=1 - [Q9IAR7_CHICK]                                              | 42.16   | 1.003 | 41.5  | 6.61  |

|        |                                                                                                                       |        |       |       |       |
|--------|-----------------------------------------------------------------------------------------------------------------------|--------|-------|-------|-------|
| F1N9H8 | Protein PRRC1 OS=Gallus gallus GN=PRRC1 PE=4 SV=2 - [F1N9H8_CHICK]                                                    | 57.73  | 1.003 | 45.9  | 5.80  |
| F1NWD5 | Leucine-rich repeat-containing protein 40 OS=Gallus gallus GN=LRRC40 PE=4 SV=1 - [F1NWD5_CHICK]                       | 0.00   | 1.003 | 67.4  | 7.15  |
| E1C078 | Aldehyde dehydrogenase OS=Gallus gallus GN=LOC428812 PE=3 SV=2 - [E1C078_CHICK]                                       | 0.00   | 1.003 | 56.0  | 7.21  |
| F1NPD3 | 60S ribosomal protein L18a (Fragment) OS=Gallus gallus GN=RPL18A PE=3 SV=2 - [F1NPD3_CHICK]                           | 127.37 | 1.002 | 21.2  | 10.81 |
| Q5ZLG8 | Transmembrane anterior posterior transformation protein 1 homolog OS=Gallus gallus GN=TAPT1 PE=2 SV=2 - [TAPT1_CHICK] | 0.00   | 1.002 | 65.7  | 8.47  |
| F1N9P9 | KRR1 small subunit processome component OS=Gallus gallus GN=KRR1 PE=3 SV=2 - [F1N9P9_CHICK]                           | 0.00   | 1.002 | 43.1  | 9.94  |
| E1C3A9 | Vigilin OS=Gallus gallus GN=HDLBP PE=4 SV=1 - [E1C3A9_CHICK]                                                          | 442.29 | 1.002 | 141.5 | 6.83  |
| Q5F425 | Protein lin-7 homolog C OS=Gallus gallus GN=LIN7C PE=1 SV=1 - [LIN7C_CHICK]                                           | 67.19  | 1.002 | 21.8  | 8.43  |
| F1P399 | Isoleucine--tRNA ligase, mitochondrial OS=Gallus gallus GN=IARS2 PE=3 SV=1 - [F1P399_CHICK]                           | 110.05 | 1.002 | 111.9 | 6.89  |
| Q5ZK95 | Coiled-coil domain-containing protein 43 OS=Gallus gallus GN=CCDC43 PE=2 SV=1 - [CCD43_CHICK]                         | 53.45  | 1.001 | 24.6  | 5.11  |
| F1NY37 | Acyl-coenzyme A oxidase OS=Gallus gallus GN=ACOX1 PE=3 SV=1 - [F1NY37_CHICK]                                          | 0.00   | 1.001 | 74.5  | 7.37  |
| F1NK98 | Tubulin-specific chaperone D OS=Gallus gallus GN=TBCD PE=4 SV=2 - [F1NK98_CHICK]                                      | 107.53 | 1.001 | 113.6 | 6.07  |
| F1NQD9 | Radixin (Fragment) OS=Gallus gallus GN=RDX PE=4 SV=2 - [F1NQD9_CHICK]                                                 | 416.65 | 1.001 | 68.4  | 6.18  |
| A5HNF6 | Myeloid differentiation primary response protein MyD88 OS=Gallus gallus GN=MYD88 PE=1 SV=1 -                          | 75.75  | 1.001 | 33.8  | 6.27  |



| [MYD88_CHICK] |                                                                                                                   |        |       |       |      |
|---------------|-------------------------------------------------------------------------------------------------------------------|--------|-------|-------|------|
| Q00944-2      | Isoform 2 of Focal adhesion kinase 1 OS=Gallus gallus GN=PTK2 - [FAK1_CHICK]                                      | 0.00   | 1.001 | 40.0  | 6.34 |
| F1NNQ3        | Vacuolar protein sorting-associated protein 29 (Fragment) OS=Gallus gallus GN=VPS29 PE=4 SV=1 -<br>[F1NNQ3_CHICK] | 56.39  | 1.001 | 20.7  | 7.05 |
| E1BSJ2        | 40S ribosomal protein S21 OS=Gallus gallus GN=RPS21 PE=3 SV=2 - [E1BSJ2_CHICK]                                    | 48.89  | 0.999 | 9.1   | 8.50 |
| F1N8N7        | Integrin beta OS=Gallus gallus GN=ITGB1 PE=3 SV=1 - [F1N8N7_CHICK]                                                | 331.42 | 0.999 | 88.6  | 5.25 |
| F1NRB7        | Sodium/potassium-transporting ATPase subunit beta-1 OS=Gallus gallus GN=ATP1B1 PE=3 SV=2 -<br>[F1NRB7_CHICK]      | 29.41  | 0.999 | 28.5  | 5.82 |
| F1NPU8        | High mobility group protein B2 OS=Gallus gallus GN=HMGB2 PE=4 SV=1 - [F1NPU8_CHICK]                               | 37.10  | 0.999 | 23.8  | 8.38 |
| E1C458        | CTP synthase OS=Gallus gallus GN=CTPS PE=3 SV=2 - [E1C458_CHICK]                                                  | 23.23  | 0.999 | 69.7  | 7.39 |
| Q5F3W6        | 14-3-3 protein gamma OS=Gallus gallus GN=YWHAG PE=1 SV=1 - [1433G_CHICK]                                          | 441.19 | 0.999 | 28.2  | 4.93 |
| E1BXJ0        | Protein-L-isoaspartate O-methyltransferase OS=Gallus gallus GN=LOC423008 PE=3 SV=2 -<br>[E1BXJ0_CHICK]            | 63.69  | 0.999 | 27.1  | 6.89 |
| Q7T0L4        | Telomeric repeat-binding factor 2-interacting protein 1 OS=Gallus gallus GN=TERF2IP PE=1 SV=1 -<br>[TE2IP_CHICK]  | 0.00   | 0.999 | 36.2  | 5.39 |
| F1NCB0        | DNA-directed RNA polymerase OS=Gallus gallus GN=POLR2B PE=3 SV=1 - [F1NCB0_CHICK]                                 | 81.20  | 0.999 | 133.7 | 6.95 |

|        |                                                                                                                                                       |        |       |       |      |
|--------|-------------------------------------------------------------------------------------------------------------------------------------------------------|--------|-------|-------|------|
| E1BZ19 | DNA topoisomerase 2 OS=Gallus gallus GN=TOP2B PE=3 SV=2 - [E1BZ19_CHICK]                                                                              | 80.49  | 0.999 | 183.2 | 8.28 |
| Q5ZK40 | SWI/SNF-related matrix-associated actin-dependent regulator of chromatin subfamily B member 1<br>OS=Gallus gallus GN=SMARCB1 PE=2 SV=1 - [SNF5_CHICK] | 0.00   | 0.999 | 44.5  | 6.18 |
| O13016 | Tyrosine-protein phosphatase non-receptor type 1 OS=Gallus gallus GN=PTPN1 PE=1 SV=1 -<br>[PTN1_CHICK]                                                | 119.64 | 0.998 | 50.3  | 6.07 |
| Q8AXV0 | Endophilin-A2 OS=Gallus gallus GN=SH3GL1 PE=1 SV=1 - [SH3G1_CHICK]                                                                                    | 144.21 | 0.998 | 41.7  | 5.44 |
| F1NN74 | Anoctamin OS=Gallus gallus GN=TMEM16E PE=3 SV=2 - [F1NN74_CHICK]                                                                                      | 38.85  | 0.998 | 106.4 | 6.33 |
| R9PXM7 | Coatomer subunit delta (Fragment) OS=Gallus gallus GN=ARCN1 PE=4 SV=1 - [R9PXM7_CHICK]                                                                | 218.70 | 0.998 | 57.0  | 6.07 |
| Q5F4B3 | Trimethyllysine dioxygenase, mitochondrial OS=Gallus gallus GN=TMLHE PE=2 SV=1 - [TMLH_CHICK]                                                         | 59.53  | 0.998 | 48.6  | 7.81 |
| F1NRU9 | Phosphatidylcholine:ceramide cholinephosphotransferase 1 (Fragment) OS=Gallus gallus GN=SGMS1<br>PE=4 SV=2 - [F1NRU9_CHICK]                           | 39.95  | 0.998 | 48.9  | 8.76 |
| F1P458 | Sulfhydryl oxidase (Fragment) OS=Gallus gallus GN=QSOX2 PE=3 SV=2 - [F1P458_CHICK]                                                                    | 46.16  | 0.998 | 78.5  | 8.28 |
| F1NR65 | Charged multivesicular body protein 2b OS=Gallus gallus GN=CHMP2B PE=4 SV=1 - [F1NR65_CHICK]                                                          | 0.00   | 0.998 | 24.0  | 8.75 |
| F1NVH2 | Tubulin-specific chaperone A OS=Gallus gallus GN=TBCA PE=4 SV=1 - [F1NVH2_CHICK]                                                                      | 32.17  | 0.998 | 12.7  | 5.44 |
| P27003 | Protein S100-A10 OS=Gallus gallus GN=S100A10 PE=3 SV=2 - [S10AA_CHICK]                                                                                | 227.10 | 0.998 | 11.3  | 7.39 |

|        |                                                                                                                    |        |       |       |      |
|--------|--------------------------------------------------------------------------------------------------------------------|--------|-------|-------|------|
| P12902 | Non-histone chromosomal protein HMG-14A OS=Gallus gallus PE=3 SV=2 - [HM14A_CHICK]                                 | 0.00   | 0.997 | 11.3  | 9.48 |
| Q5ZIN0 | Monoacylglycerol lipase ABHD12 OS=Gallus gallus GN=ABHD12 PE=2 SV=1 - [ABD12_CHICK]                                | 0.00   | 0.997 | 43.8  | 8.91 |
| Q5ZL38 | SAGA-associated factor 29 homolog OS=Gallus gallus GN=CCDC101 PE=2 SV=1 - [SGF29_CHICK]                            | 43.95  | 0.997 | 33.1  | 8.10 |
| O42184 | CAP-Gly domain-containing linker protein 1 OS=Gallus gallus GN=CLIP1 PE=2 SV=1 - [CLIP1_CHICK]                     | 81.45  | 0.997 | 160.9 | 5.34 |
| F1NKR8 | Major vault protein OS=Gallus gallus GN=MVP PE=4 SV=2 - [F1NKR8_CHICK]                                             | 239.28 | 0.996 | 93.7  | 5.45 |
| R4GMJ4 | Eukaryotic translation initiation factor 3 subunit K OS=Gallus gallus GN=EIF3K PE=3 SV=1 - [R4GMJ4_CHICK]          | 67.16  | 0.996 | 34.2  | 6.24 |
| Q5ZI72 | Heterogeneous nuclear ribonucleoprotein D-like OS=Gallus gallus GN=HNRNPDL PE=2 SV=1 - [HNRDL_CHICK]               | 215.00 | 0.996 | 33.4  | 7.31 |
| E1C3B2 | Cytochrome c oxidase subunit 6A, mitochondrial OS=Gallus gallus GN=COX6A1 PE=3 SV=1 - [E1C3B2_CHICK]               | 0.00   | 0.996 | 11.8  | 9.35 |
| Q5ZMN0 | Acidic leucine-rich nuclear phosphoprotein 32 family member B OS=Gallus gallus GN=ANP32B PE=2 SV=1 - [AN32B_CHICK] | 39.82  | 0.996 | 29.9  | 3.98 |
| F1NZF0 | DNA topoisomerase 2 OS=Gallus gallus GN=TOP2A PE=3 SV=2 - [F1NZF0_CHICK]                                           | 88.13  | 0.996 | 167.9 | 8.75 |
| F1NTQ2 | Beta-hexosaminidase (Fragment) OS=Gallus gallus GN=HEXB PE=3 SV=2 - [F1NTQ2_CHICK]                                 | 105.44 | 0.996 | 63.4  | 6.49 |
| F1N9Y0 | Tubulin gamma chain (Fragment) OS=Gallus gallus GN=TUBG1 PE=3 SV=2 - [F1N9Y0_CHICK]                                | 22.35  | 0.995 | 48.3  | 5.90 |

|        |                                                                                                            |        |       |      |      |
|--------|------------------------------------------------------------------------------------------------------------|--------|-------|------|------|
| F1NZ90 | trRNA pseudouridine synthase (Fragment) OS=Gallus gallus GN=PUS1 PE=3 SV=2 - [F1NZ90_CHICK]                | 84.20  | 0.995 | 45.2 | 8.25 |
| F2Z4K4 | 60S ribosomal protein L5 (Fragment) OS=Gallus gallus GN=RPL5 PE=3 SV=1 - [F2Z4K4_CHICK]                    | 207.23 | 0.995 | 33.9 | 9.72 |
| Q9PTR5 | Lissencephaly-1 homolog OS=Gallus gallus GN=PFAFH1B1 PE=2 SV=3 - [LIS1_CHICK]                              | 81.08  | 0.995 | 46.6 | 7.37 |
| F1NJ60 | Protein Hook homolog 1 OS=Gallus gallus GN=HOOK1 PE=4 SV=1 - [F1NJ60_CHICK]                                | 0.00   | 0.995 | 83.0 | 5.21 |
| P20135 | Glutathione S-transferase theta-1 OS=Gallus gallus GN=GSTT1 PE=1 SV=3 - [GSTT1_CHICK]                      | 0.00   | 0.995 | 29.8 | 7.11 |
| Q6JLB2 | Proteasome subunit beta type OS=Gallus gallus GN=PSMB1 PE=3 SV=1 - [Q6JLB2_CHICK]                          | 168.99 | 0.995 | 26.0 | 6.89 |
| Q5ZII9 | Tuftelin-interacting protein 11 OS=Gallus gallus GN=TFIP11 PE=2 SV=1 - [TFP11_CHICK]                       | 35.91  | 0.995 | 95.5 | 6.02 |
| F1P180 | Aspartate aminotransferase OS=Gallus gallus GN=GOT2 PE=3 SV=2 - [F1P180_CHICK]                             | 480.25 | 0.995 | 47.3 | 9.33 |
| Q90972 | E3 ubiquitin-protein ligase RNF13 OS=Gallus gallus GN=RNF13 PE=1 SV=1 - [RNF13_CHICK]                      | 0.00   | 0.995 | 42.8 | 4.97 |
| Q90WD0 | Actin-related protein 3 OS=Gallus gallus GN=ACTR3 PE=2 SV=1 - [ARP3_CHICK]                                 | 97.13  | 0.994 | 47.4 | 5.88 |
| Q5ZKM0 | Dysbindin OS=Gallus gallus GN=DTNBP1 PE=2 SV=1 - [DTBP1_CHICK]                                             | 0.00   | 0.994 | 39.6 | 4.59 |
| R4GHX2 | Peptidyl-prolyl cis-trans isomerase (Fragment) OS=Gallus gallus GN=PPIA PE=3 SV=1 - [R4GHX2_CHICK]         | 421.60 | 0.994 | 15.9 | 8.79 |
| F1NAP9 | RNA-binding protein with multiple-splicing (Fragment) OS=Gallus gallus GN=RBPMS PE=4 SV=1 - [F1NAP9_CHICK] | 0.00   | 0.994 | 21.5 | 9.50 |

|        |                                                                                                  |        |       |       |       |
|--------|--------------------------------------------------------------------------------------------------|--------|-------|-------|-------|
| P62303 | Small nuclear ribonucleoprotein E OS=Gallus gallus GN=SNRPE PE=3 SV=1 - [RUXE_CHICK]             | 0.00   | 0.994 | 10.8  | 9.44  |
| Q9DDU8 | Transformer-2 beta OS=Gallus gallus GN=TRA2B PE=2 SV=1 - [Q9DDU8_CHICK]                          | 63.68  | 0.994 | 33.8  | 11.25 |
| Q90Z16 | Optineurin OS=Gallus gallus GN=OPTN PE=1 SV=1 - [OPTN_CHICK]                                     | 32.28  | 0.993 | 64.0  | 5.00  |
| F1NQG5 | Ribosomal protein L15 OS=Gallus gallus GN=RPL15 PE=3 SV=2 - [F1NQG5_CHICK]                       | 73.10  | 0.993 | 24.1  | 11.62 |
| Q91955 | Myotrophin OS=Gallus gallus GN=MTPN PE=3 SV=1 - [MTPN_CHICK]                                     | 51.37  | 0.992 | 12.9  | 5.29  |
| Q90771 | Cyclin-dependent kinase OS=Gallus gallus GN=cdk6 PE=4 SV=1 - [Q90771_CHICK]                      | 66.87  | 0.992 | 36.8  | 5.99  |
| E1BRL4 | Synaptosomal-associated protein OS=Gallus gallus GN=SNAP23 PE=3 SV=1 - [E1BRL4_CHICK]            | 0.00   | 0.992 | 23.6  | 5.01  |
| Q5ZIF1 | Adipocyte plasma membrane-associated protein OS=Gallus gallus GN=APMAP PE=2 SV=1 - [APMAP_CHICK] | 137.57 | 0.992 | 46.1  | 6.21  |
| F1NC33 | Heat shock cognate protein HSP 90-beta OS=Gallus gallus GN=HSP90AB1 PE=3 SV=1 - [F1NC33_CHICK]   | 653.04 | 0.992 | 83.4  | 5.03  |
| Q5ZIC8 | Importin-13 OS=Gallus gallus GN=IPO13 PE=2 SV=1 - [IPO13_CHICK]                                  | 0.00   | 0.992 | 107.7 | 5.48  |
| F1P3X9 | Transcriptional enhancer factor TEF-5 OS=Gallus gallus GN=TEAD3 PE=4 SV=2 - [F1P3X9_CHICK]       | 23.90  | 0.992 | 46.3  | 8.78  |
| F1NWH1 | RNA polymerase II-associated protein 3 OS=Gallus gallus GN=RPAP3 PE=4 SV=1 - [F1NWH1_CHICK]      | 31.52  | 0.991 | 75.9  | 5.73  |
| F1NQG6 | Signal transducing adapter molecule 2 OS=Gallus gallus GN=STAM2 PE=4 SV=1 - [F1NQG6_CHICK]       | 41.81  | 0.991 | 48.4  | 4.84  |
| P23614 | Brain acid soluble protein 1 homolog OS=Gallus gallus GN=BASP1 PE=2 SV=4 - [BASP1_CHICK]         | 53.12  | 0.991 | 25.4  | 4.68  |

|        |                                                                                                                        |        |       |       |      |
|--------|------------------------------------------------------------------------------------------------------------------------|--------|-------|-------|------|
| F1NGN4 | Bifunctional arginine demethylase and lysyl-hydroxylase JMJD6 OS=Gallus gallus GN=JMJD6 PE=4 SV=1<br>- [F1NGN4_CHICK]  | 25.16  | 0.991 | 47.8  | 8.73 |
| F1NLL8 | Protein polybromo-1 OS=Gallus gallus GN=PBRM1 PE=4 SV=1 - [F1NLL8_CHICK]                                               | 0.00   | 0.991 | 186.7 | 6.83 |
| P28687 | Signal peptidase complex subunit 3 OS=Gallus gallus GN=SPC22 PE=1 SV=1 - [SPCS3_CHICK]                                 | 34.86  | 0.991 | 20.2  | 8.65 |
| F1NJV4 | Protein-L-isoaspartate O-methyltransferase OS=Gallus gallus GN=PCMT1 PE=3 SV=1 - [F1NJV4_CHICK]                        | 51.16  | 0.991 | 21.2  | 5.78 |
| P40618 | High mobility group protein B3 OS=Gallus gallus GN=HMGB3 PE=2 SV=3 - [HMGB3_CHICK]                                     | 219.55 | 0.991 | 23.0  | 8.12 |
| F1P2G4 | Adenylyl cyclase-associated protein OS=Gallus gallus GN=CAP1 PE=3 SV=2 - [F1P2G4_CHICK]                                | 247.85 | 0.990 | 57.6  | 7.99 |
| Q5ZJQ7 | RNA polymerase II subunit A C-terminal domain phosphatase SSU72 OS=Gallus gallus GN=SSU72 PE=2<br>SV=1 - [SSU72_CHICK] | 63.20  | 0.990 | 22.6  | 5.33 |
| P50890 | 40S ribosomal protein SA OS=Gallus gallus GN=RPSA PE=3 SV=1 - [RSSA_CHICK]                                             | 266.36 | 0.990 | 33.0  | 4.87 |
| R9PXQ9 | Fatty acyl-CoA reductase 1 OS=Gallus gallus GN=FAR1 PE=4 SV=1 - [R9PXQ9_CHICK]                                         | 47.72  | 0.990 | 56.5  | 9.01 |
| Q5ZHT7 | Signal recognition particle 9 kDa protein OS=Gallus gallus GN=SRP9 PE=3 SV=1 - [Q5ZHT7_CHICK]                          | 0.00   | 0.990 | 10.1  | 7.88 |
| Q9DEA3 | Proliferating cell nuclear antigen OS=Gallus gallus GN=PCNA PE=1 SV=1 - [PCNA_CHICK]                                   | 72.93  | 0.990 | 28.9  | 4.72 |
| Q5ZKF5 | S-phase kinase-associated protein 1 OS=Gallus gallus GN=SKP1 PE=2 SV=1 - [SKP1_CHICK]                                  | 162.90 | 0.989 | 18.6  | 4.54 |
| F1NWB8 | p21-activated protein kinase-interacting protein 1-like OS=Gallus gallus GN=PAK1IP1 PE=4 SV=2 -                        | 0.00   | 0.989 | 34.5  | 9.45 |

[F1NWB8\_CHICK]

|        |                                                                                                                     |        |       |       |      |
|--------|---------------------------------------------------------------------------------------------------------------------|--------|-------|-------|------|
| Q5F433 | PRA1 family protein 3 OS=Gallus gallus GN=ARL6IP5 PE=2 SV=1 - [PRAF3_CHICK]                                         | 51.93  | 0.989 | 21.6  | 9.50 |
| Q8UVD9 | Far upstream element-binding protein 2 OS=Gallus gallus GN=KHSRP PE=1 SV=1 - [FUBP2_CHICK]                          | 350.94 | 0.989 | 80.6  | 6.90 |
| Q5F418 | 26S proteasome non-ATPase regulatory subunit 1 OS=Gallus gallus GN=PSMD1 PE=2 SV=1 - [PSMD1_CHICK]                  | 248.46 | 0.989 | 106.0 | 5.36 |
| B6ZLK1 | FACT complex subunit SSRP1 OS=Gallus gallus GN=SSRP1 PE=2 SV=1 - [B6ZLK1_CHICK]                                     | 68.97  | 0.989 | 80.0  | 6.87 |
| F1NN92 | Uridine-cytidine kinase (Fragment) OS=Gallus gallus GN=UCK1 PE=3 SV=2 - [F1NN92_CHICK]                              | 0.00   | 0.989 | 31.3  | 8.25 |
| F1NFT8 | WD repeat-containing protein 61 OS=Gallus gallus GN=WDR61 PE=4 SV=1 - [F1NFT8_CHICK]                                | 43.80  | 0.989 | 33.3  | 5.47 |
| F1NBBO | 2-methoxy-6-polyprenyl-1,4-benzoquinol methylase, mitochondrial OS=Gallus gallus GN=COQ5 PE=3 SV=1 - [F1NBBO_CHICK] | 0.00   | 0.989 | 35.1  | 7.21 |
| P0CB05 | Centrosomal protein of 63 kDa OS=Gallus gallus GN=CEP63 PE=2 SV=1 - [CEP63_CHICK]                                   | 0.00   | 0.989 | 82.0  | 5.36 |
| Q9I8D6 | T-complex protein 1 subunit delta OS=Gallus gallus GN=tcp-1 delta PE=2 SV=1 - [Q9I8D6_CHICK]                        | 402.74 | 0.989 | 57.7  | 7.80 |
| Q5ZHP5 | Charged multivesicular body protein 4b OS=Gallus gallus GN=CHMP4B PE=2 SV=1 - [CHM4B_CHICK]                         | 278.69 | 0.989 | 25.1  | 4.79 |
| Q5ZMV3 | Protein Dr1 OS=Gallus gallus GN=DR1 PE=2 SV=1 - [NC2B_CHICK]                                                        | 57.37  | 0.989 | 19.4  | 4.75 |
| F1NQTO | DNA polymerase OS=Gallus gallus GN=REV3L PE=3 SV=2 - [F1NQTO_CHICK]                                                 | 16.84  | 0.989 | 344.3 | 8.07 |

|        |                                                                                                                    |        |       |      |       |
|--------|--------------------------------------------------------------------------------------------------------------------|--------|-------|------|-------|
| Q5ZM91 | cAMP-dependent protein kinase type I-alpha regulatory subunit OS=Gallus gallus GN=PRKAR1A PE=2 SV=1 - [KAP0_CHICK] | 68.56  | 0.988 | 43.3 | 5.35  |
| P33879 | Sodium/potassium-transporting ATPase subunit beta-3 OS=Gallus gallus GN=ATP1B3 PE=2 SV=1 - [AT1B3_CHICK]           | 67.53  | 0.988 | 31.8 | 7.94  |
| Q5ZLR5 | Cytochrome b-c1 complex subunit Rieske, mitochondrial OS=Gallus gallus GN=UQCRFS1 PE=1 SV=1 - [UCRI_CHICK]         | 28.33  | 0.988 | 29.4 | 8.43  |
| Q6ITC7 | 40S ribosomal protein S13 OS=Gallus gallus GN=RPS13 PE=2 SV=3 - [RS13_CHICK]                                       | 102.78 | 0.987 | 17.2 | 10.54 |
| F1NI02 | Argininosuccinate lyase (Fragment) OS=Gallus gallus GN=ASL2 PE=3 SV=1 - [F1NI02_CHICK]                             | 35.10  | 0.987 | 50.9 | 6.40  |
| Q90687 | Tyrosine-protein phosphatase non-receptor type 11 OS=Gallus gallus GN=PTPN11 PE=2 SV=1 - [PTN11_CHICK]             | 57.07  | 0.987 | 67.9 | 7.20  |
| F1P2L5 | Large subunit GTPase 1 homolog OS=Gallus gallus GN=LSG1 PE=4 SV=1 - [F1P2L5_CHICK]                                 | 37.27  | 0.987 | 73.8 | 6.01  |
| E1BRE2 | NAD-dependent protein deacylase sirtuin-5, mitochondrial OS=Gallus gallus GN=SIRT5 PE=3 SV=1 - [SIR5_CHICK]        | 63.92  | 0.987 | 33.9 | 7.44  |
| H9L0C4 | Pre-mRNA-processing factor 19 (Fragment) OS=Gallus gallus GN=PRPF19 PE=4 SV=2 - [H9L0C4_CHICK]                     | 96.81  | 0.987 | 40.5 | 6.74  |
| F1P3L3 | Semaphorin-3C OS=Gallus gallus GN=SEMA3C PE=4 SV=2 - [F1P3L3_CHICK]                                                | 48.61  | 0.987 | 85.4 | 8.68  |
| R4GIW5 | Phosphatidylinositol 5-phosphate 4-kinase type-2 alpha OS=Gallus gallus GN=PIP4K2A PE=4 SV=1 -                     | 33.29  | 0.986 | 38.4 | 6.21  |



[R4GIW5\_CHICK]

|        |                                                                                                            |        |       |       |      |
|--------|------------------------------------------------------------------------------------------------------------|--------|-------|-------|------|
| Q5ZJQ2 | Phenylalanine--tRNA ligase alpha subunit OS=Gallus gallus GN=FARSA PE=1 SV=1 - [SYFA_CHICK]                | 115.79 | 0.986 | 49.5  | 8.92 |
| F1NV93 | Peptidyl-prolyl cis-trans isomerase (Fragment) OS=Gallus gallus GN=PPIB PE=3 SV=2 - [F1NV93_CHICK]         | 215.30 | 0.986 | 16.2  | 9.11 |
| E1BR22 | Calpain-2 catalytic subunit OS=Gallus gallus GN=CAPN2 PE=4 SV=1 - [E1BR22_CHICK]                           | 165.13 | 0.986 | 79.2  | 5.58 |
| E1BSF5 | Branched-chain-amino-acid aminotransferase OS=Gallus gallus GN=BCAT1 PE=3 SV=2 - [E1BSF5_CHICK]            | 0.00   | 0.986 | 43.0  | 5.77 |
| Q5SDR3 | Polycomb complex protein BMI-1 OS=Gallus gallus GN=BMI1 PE=2 SV=1 - [BMI1_CHICK]                           | 0.00   | 0.986 | 36.9  | 8.63 |
| F1NVD4 | Adenylosuccinate synthetase (Fragment) OS=Gallus gallus GN=ADSSL1 PE=3 SV=2 - [F1NVD4_CHICK]               | 153.88 | 0.985 | 48.8  | 7.96 |
| Q5ZJ25 | Vacuolar protein sorting-associated protein 51 homolog OS=Gallus gallus GN=VPS51 PE=2 SV=1 - [VPS51_CHICK] | 28.03  | 0.985 | 86.0  | 6.42 |
| F1NTD6 | Activating signal cointegrator 1 complex subunit 3 OS=Gallus gallus GN=ascc3 PE=3 SV=2 - [ASCC3_CHICK]     | 0.00   | 0.985 | 251.7 | 6.77 |
| P21868 | Casein kinase II subunit alpha OS=Gallus gallus GN=CSNK2A1 PE=2 SV=1 - [CSK21_CHICK]                       | 35.21  | 0.984 | 45.2  | 7.74 |
| F1NJS6 | Importin subunit alpha OS=Gallus gallus GN=KPNA2 PE=3 SV=1 - [F1NJS6_CHICK]                                | 51.10  | 0.984 | 58.0  | 5.48 |
| F1NL85 | Magnesium transporter protein 1 OS=Gallus gallus GN=MAGT1 PE=4 SV=1 - [F1NL85_CHICK]                       | 38.47  | 0.984 | 36.8  | 9.63 |

|        |                                                                                                                 |        |       |      |      |
|--------|-----------------------------------------------------------------------------------------------------------------|--------|-------|------|------|
| Q5ZIJ0 | BUD13 homolog OS=Gallus gallus GN=BUD13 PE=2 SV=1 - [BUD13_CHICK]                                               | 0.00   | 0.984 | 64.4 | 9.89 |
| Q8UUU0 | Erg isoform C-1-1 OS=Gallus gallus GN=ERG PE=2 SV=1 - [Q8UUU0_CHICK]                                            | 39.00  | 0.984 | 51.0 | 7.62 |
| Q5ZIT5 | Ras-related protein Rab-10 OS=Gallus gallus GN=RAB10 PE=2 SV=1 - [RAB10_CHICK]                                  | 167.71 | 0.984 | 22.5 | 8.38 |
| E1C4C0 | Acyl carrier protein OS=Gallus gallus GN=NDUFAB1 PE=3 SV=2 - [E1C4C0_CHICK]                                     | 55.54  | 0.984 | 16.5 | 5.22 |
| Q9YGW6 | Ezrin OS=Gallus gallus GN=EZR PE=2 SV=1 - [Q9YGW6_CHICK]                                                        | 396.69 | 0.984 | 69.3 | 6.20 |
| Q5ZMU0 | 28S ribosomal protein S7, mitochondrial OS=Gallus gallus GN=MRPS7 PE=2 SV=2 - [RT07_CHICK]                      | 0.00   | 0.983 | 27.3 | 9.72 |
| F1NCA4 | RNA binding protein fox-1 homolog OS=Gallus gallus GN=RBFOX2 PE=3 SV=2 - [F1NCA4_CHICK]                         | 0.00   | 0.983 | 40.0 | 8.56 |
| Q2PUH1 | 5'-AMP-activated protein kinase alpha-1 catalytic subunit OS=Gallus gallus GN=PRKAA1 PE=2 SV=1 - [Q2PUH1_CHICK] | 38.94  | 0.983 | 64.1 | 7.97 |
| Q5ZKJ4 | FGFR1 oncogene partner 2 homolog OS=Gallus gallus GN=FGFR1OP2 PE=2 SV=1 - [FGOP2_CHICK]                         | 0.00   | 0.983 | 25.2 | 6.33 |
| Q5ZJ60 | 3-hydroxyisobutyryl-CoA hydrolase, mitochondrial OS=Gallus gallus GN=HIBCH PE=2 SV=1 - [HIBCH_CHICK]            | 167.60 | 0.983 | 42.8 | 8.44 |
| P08629 | Thioredoxin OS=Gallus gallus GN=TXN PE=3 SV=2 - [THIO_CHICK]                                                    | 363.80 | 0.983 | 11.7 | 5.25 |
| E1BR00 | Adenylosuccinate lyase OS=Gallus gallus GN=ADSL PE=4 SV=2 - [E1BR00_CHICK]                                      | 65.39  | 0.983 | 54.6 | 7.12 |
| F1NX30 | Cell cycle control protein 50A OS=Gallus gallus GN=TMEM30A PE=4 SV=1 - [F1NX30_CHICK]                           | 0.00   | 0.983 | 41.4 | 8.31 |

|        |                                                                                                                         |        |       |      |       |
|--------|-------------------------------------------------------------------------------------------------------------------------|--------|-------|------|-------|
| R4GKE0 | Peptidyl-prolyl cis-trans isomerase (Fragment) OS=Gallus gallus GN=FKBP1A PE=4 SV=1 - [R4GKE0_CHICK]                    | 240.99 | 0.983 | 8.9  | 7.25  |
| F1P1H7 | Rab GTPase-activating protein 1-like OS=Gallus gallus GN=RABGAP1L PE=4 SV=2 - [F1P1H7_CHICK]                            | 0.00   | 0.983 | 92.5 | 5.29  |
| R4GLB3 | Proteasome subunit beta type OS=Gallus gallus GN=PSMB2 PE=3 SV=1 - [R4GLB3_CHICK]                                       | 34.25  | 0.982 | 22.7 | 6.54  |
| P00789 | Calpain-1 catalytic subunit OS=Gallus gallus PE=1 SV=2 - [CANX_CHICK]                                                   | 77.57  | 0.982 | 80.3 | 5.00  |
| Q5F3A4 | RELT-like protein 1 OS=Gallus gallus GN=RELL1 PE=2 SV=1 - [RELL1_CHICK]                                                 | 29.65  | 0.981 | 31.1 | 7.37  |
| Q5ZLX5 | Zinc finger Ran-binding domain-containing protein 2 OS=Gallus gallus GN=ZRANB2 PE=2 SV=1 - [ZRAB2_CHICK]                | 0.00   | 0.981 | 37.8 | 10.02 |
| F1P1D9 | Cysteine--tRNA ligase, cytoplasmic (Fragment) OS=Gallus gallus GN=CARS PE=3 SV=2 - [F1P1D9_CHICK]                       | 40.09  | 0.981 | 85.0 | 6.70  |
| Q5F3G7 | Glycoprotein-N-acetylgalactosamine 3-beta-galactosyltransferase 1 OS=Gallus gallus GN=C1GALT1 PE=2 SV=1 - [C1GLT_CHICK] | 0.00   | 0.981 | 42.6 | 6.35  |
| F1NLL2 | Beta-galactosidase OS=Gallus gallus GN=GLB1L3 PE=3 SV=2 - [F1NLL2_CHICK]                                                | 41.25  | 0.981 | 72.9 | 7.39  |
| Q91000 | Trans Golgi network protease furin OS=Gallus gallus GN=FURIN PE=2 SV=1 - [Q91000_CHICK]                                 | 63.11  | 0.980 | 86.6 | 6.43  |
| O12940 | Target of Myb protein 1 OS=Gallus gallus GN=TOM1 PE=2 SV=2 - [TOM1_CHICK]                                               | 65.86  | 0.980 | 57.0 | 5.19  |
| Q5ZMD1 | 14-3-3 protein theta OS=Gallus gallus GN=YWHAQ PE=1 SV=1 - [1433T_CHICK]                                                | 585.27 | 0.980 | 27.8 | 4.78  |

|        |                                                                                                           |        |       |       |       |
|--------|-----------------------------------------------------------------------------------------------------------|--------|-------|-------|-------|
| F1NNI7 | 39S ribosomal protein L15, mitochondrial OS=Gallus gallus GN=MRPL15 PE=3 SV=1 - [F1NNI7_CHICK]            | 52.30  | 0.980 | 33.6  | 10.07 |
| E1BTJ1 | Glycylpeptide N-tetradecanoyltransferase OS=Gallus gallus GN=NMT2 PE=3 SV=1 - [E1BTJ1_CHICK]              | 0.00   | 0.980 | 56.8  | 7.53  |
| Q04861 | Nuclear factor NF-kappa-B p105 subunit OS=Gallus gallus GN=NFKB1 PE=2 SV=2 - [NFKB1_CHICK]                | 42.15  | 0.980 | 107.9 | 5.77  |
| F1NZM1 | Eukaryotic translation initiation factor 3 subunit E OS=Gallus gallus GN=EIF3E PE=3 SV=1 - [F1NZM1_CHICK] | 175.56 | 0.979 | 52.1  | 6.04  |
| F1NEQ6 | Proteasome subunit alpha type (Fragment) OS=Gallus gallus GN=PSMA6 PE=3 SV=1 - [F1NEQ6_CHICK]             | 151.95 | 0.979 | 27.7  | 6.55  |
| E1C810 | Ribosomal protein L37 OS=Gallus gallus GN=RPL37 PE=3 SV=1 - [E1C810_CHICK]                                | 39.79  | 0.978 | 11.1  | 11.74 |
| P09653 | Tubulin beta-5 chain OS=Gallus gallus PE=3 SV=1 - [TBB5_CHICK]                                            | 743.19 | 0.978 | 49.9  | 4.88  |
| Q8UWG7 | 60S ribosomal protein L6 OS=Gallus gallus GN=RPL6 PE=2 SV=1 - [Q8UWG7_CHICK]                              | 89.85  | 0.978 | 33.9  | 10.67 |
| E1BRK2 | Histone deacetylase complex subunit SAP130 OS=Gallus gallus GN=SAP130 PE=4 SV=2 - [E1BRK2_CHICK]          | 0.00   | 0.978 | 110.8 | 9.91  |
| F1NCB2 | Sodium/hydrogen exchanger OS=Gallus gallus GN=SLC9A6 PE=3 SV=2 - [F1NCB2_CHICK]                           | 44.23  | 0.978 | 67.9  | 5.86  |
| Q5ZHQ1 | Small ubiquitin-related modifier 3 OS=Gallus gallus GN=SUMO3 PE=3 SV=1 - [SUMO3_CHICK]                    | 107.05 | 0.977 | 10.7  | 5.50  |
| F1NK38 | T-complex protein 1 subunit eta OS=Gallus gallus GN=CCT7 PE=3 SV=2 - [F1NK38_CHICK]                       | 532.63 | 0.977 | 60.0  | 6.09  |
| F1NS23 | Adenylosuccinate synthetase (Fragment) OS=Gallus gallus GN=ADSS PE=3 SV=1 - [F1NS23_CHICK]                | 0.00   | 0.977 | 43.9  | 6.38  |

|        |                                                                                                            |        |       |       |      |
|--------|------------------------------------------------------------------------------------------------------------|--------|-------|-------|------|
| E1C718 | Ubiquitin carboxyl-terminal hydrolase OS=Gallus gallus GN=USP15 PE=3 SV=2 - [E1C718_CHICK]                 | 63.75  | 0.977 | 112.0 | 5.26 |
| F1NG91 | Methyltransferase-like protein 9 (Fragment) OS=Gallus gallus GN=METTL9 PE=4 SV=2 - [F1NG91_CHICK]          | 0.00   | 0.977 | 35.8  | 6.43 |
| F1NFW2 | Hydroxypyruvate isomerase (Fragment) OS=Gallus gallus PE=3 SV=2 - [F1NFW2_CHICK]                           | 0.00   | 0.977 | 29.4  | 7.44 |
| P21869 | Casein kinase II subunit alpha' OS=Gallus gallus PE=2 SV=1 - [CSK22_CHICK]                                 | 62.27  | 0.977 | 41.2  | 8.25 |
| Q5ZKG5 | Low molecular weight phosphotyrosine protein phosphatase OS=Gallus gallus GN=ACP1 PE=2 SV=3 - [PPAC_CHICK] | 101.98 | 0.977 | 18.2  | 7.20 |
| F1NXK3 | Palmitoyltransferase OS=Gallus gallus GN=ZDHHC5 PE=3 SV=1 - [F1NXK3_CHICK]                                 | 20.20  | 0.976 | 78.2  | 9.11 |
| F1NIG8 | Cholecystokinin OS=Gallus gallus GN=CCK PE=3 SV=1 - [F1NIG8_CHICK]                                         | 0.00   | 0.976 | 14.1  | 8.03 |
| Q90932 | Nuclear factor 1 X-type OS=Gallus gallus GN=NFIX PE=2 SV=1 - [NFIX_CHICK]                                  | 34.19  | 0.976 | 46.9  | 8.29 |
| Q5ZJU4 | Ubiquitin-related modifier 1 OS=Gallus gallus GN=URM1 PE=3 SV=1 - [URM1_CHICK]                             | 0.00   | 0.976 | 11.4  | 4.84 |
| F1P204 | Multidrug resistance-associated protein 1 OS=Gallus gallus GN=ABCC1 PE=3 SV=2 - [F1P204_CHICK]             | 94.88  | 0.976 | 170.8 | 7.88 |
| R4GHW9 | Erythroid protein 4.1 OS=Gallus gallus GN=EPB41 PE=4 SV=1 - [R4GHW9_CHICK]                                 | 53.63  | 0.976 | 96.8  | 5.92 |
| Q5ZM60 | Cell cycle progression protein 1 OS=Gallus gallus GN=CCPG1 PE=2 SV=1 - [CCPG1_CHICK]                       | 38.61  | 0.976 | 93.4  | 6.32 |
| Q5ZIW2 | CCR4-NOT transcription complex subunit 10 OS=Gallus gallus GN=CNOT10 PE=2 SV=1 -                           | 0.00   | 0.975 | 82.1  | 7.66 |

| [CNO10_CHICK] |                                                                                                             |        |       |       |      |
|---------------|-------------------------------------------------------------------------------------------------------------|--------|-------|-------|------|
| Q5ZHT1        | Acyl-CoA dehydrogenase family member 11 OS=Gallus gallus GN=ACAD11 PE=2 SV=1 - [ACD11_CHICK]                | 0.00   | 0.975 | 86.9  | 8.15 |
| Q5ZJ54        | T-complex protein 1 subunit zeta OS=Gallus gallus GN=CCT6 PE=1 SV=3 - [TCPZ_CHICK]                          | 332.94 | 0.975 | 57.6  | 6.81 |
| F1NW23        | Clathrin heavy chain (Fragment) OS=Gallus gallus GN=CLTC PE=3 SV=1 - [F1NW23_CHICK]                         | 959.29 | 0.975 | 189.9 | 5.72 |
| Q04205        | Tensin OS=Gallus gallus GN=TNS PE=1 SV=2 - [TENS_CHICK]                                                     | 84.63  | 0.975 | 187.1 | 7.34 |
| Q9DGN6        | Endothelin converting enzyme-1 OS=Gallus gallus GN=ECE-1 PE=2 SV=1 - [Q9DGN6_CHICK]                         | 38.74  | 0.975 | 84.9  | 5.22 |
| Q5ZML6        | Protein FAM210A OS=Gallus gallus GN=FAM210A PE=2 SV=1 - [F210A_CHICK]                                       | 0.00   | 0.974 | 30.4  | 9.29 |
| F1NB52        | Coatomer subunit gamma OS=Gallus gallus GN=COPG PE=3 SV=1 - [F1NB52_CHICK]                                  | 236.62 | 0.974 | 97.5  | 5.45 |
| Q3C2H6        | Protein Wnt OS=Gallus gallus GN=Wnt6 PE=2 SV=1 - [Q3C2H6_CHICK]                                             | 0.00   | 0.974 | 39.3  | 8.38 |
| O42254        | Insulin-like growth factor 2 mRNA-binding protein 1 OS=Gallus gallus GN=IGF2BP1 PE=1 SV=1 - [IF2B1_CHICK]   | 358.11 | 0.974 | 63.2  | 9.14 |
| Q9PTD5        | Mitochondrial fission regulator 1 OS=Gallus gallus GN=MTFR1 PE=1 SV=2 - [MTFR1_CHICK]                       | 0.00   | 0.974 | 37.0  | 9.36 |
| P00940        | Triosephosphate isomerase OS=Gallus gallus GN=TPI1 PE=1 SV=2 - [TPIS_CHICK]                                 | 245.17 | 0.974 | 26.6  | 7.20 |
| F1NDG9        | Mesoderm induction early response protein 1 (Fragment) OS=Gallus gallus GN=MIER1 PE=4 SV=1 - [F1NDG9_CHICK] | 0.00   | 0.974 | 57.7  | 4.39 |

|        |                                                                                                                          |        |       |       |      |
|--------|--------------------------------------------------------------------------------------------------------------------------|--------|-------|-------|------|
| Q5F3T9 | UDP-glucose 6-dehydrogenase OS=Gallus gallus GN=UGDH PE=2 SV=1 - [UGDH_CHICK]                                            | 71.65  | 0.974 | 55.0  | 7.27 |
| F1P3Y7 | Serine/threonine-protein kinase 11-interacting protein (Fragment) OS=Gallus gallus GN=STK11IP PE=4 SV=2 - [F1P3Y7_CHICK] | 0.00   | 0.974 | 118.9 | 5.54 |
| F1NV68 | Importin subunit alpha (Fragment) OS=Gallus gallus GN=KPNA3 PE=3 SV=2 - [F1NV68_CHICK]                                   | 50.26  | 0.973 | 55.3  | 4.81 |
| F1NKN6 | Lens epithelium-derived growth factor OS=Gallus gallus GN=PSIP1 PE=4 SV=2 - [F1NKN6_CHICK]                               | 0.00   | 0.973 | 62.6  | 9.31 |
| P38024 | Multifunctional protein ADE2 OS=Gallus gallus GN=AIRC PE=2 SV=1 - [PUR6_CHICK]                                           | 152.50 | 0.973 | 47.2  | 7.93 |
| F1NQB6 | Unconventional myosin-Va OS=Gallus gallus GN=MYO5A PE=4 SV=2 - [F1NQB6_CHICK]                                            | 145.64 | 0.973 | 212.3 | 8.47 |
| F1NIQ3 | Sister chromatid cohesion protein PDS5 homolog A OS=Gallus gallus GN=PDS5A PE=4 SV=1 - [F1NIQ3_CHICK]                    | 70.11  | 0.973 | 150.0 | 7.83 |
| F1P2D7 | Chromatin assembly factor 1 subunit B OS=Gallus gallus GN=CHAF1B PE=4 SV=1 - [F1P2D7_CHICK]                              | 17.21  | 0.973 | 62.6  | 7.66 |
| Q5F3D7 | U3 small nucleolar RNA-associated protein 15 homolog OS=Gallus gallus GN=UTP15 PE=2 SV=1 - [UTP15_CHICK]                 | 0.00   | 0.972 | 58.4  | 9.04 |
| F1NE97 | Nuclear migration protein nudC OS=Gallus gallus GN=NUDC PE=4 SV=1 - [F1NE97_CHICK]                                       | 115.95 | 0.972 | 39.2  | 5.40 |
| E1BZL0 | Ubiquitin carboxyl-terminal hydrolase OS=Gallus gallus GN=USP24 PE=3 SV=2 - [E1BZL0_CHICK]                               | 0.00   | 0.972 | 258.7 | 6.58 |
| F1NKK7 | Transmembrane protein 175 OS=Gallus gallus GN=TMEM175 PE=4 SV=1 - [F1NKK7_CHICK]                                         | 17.03  | 0.972 | 56.1  | 6.61 |

|          |                                                                                                                                   |        |       |      |      |
|----------|-----------------------------------------------------------------------------------------------------------------------------------|--------|-------|------|------|
| E1C650   | P2X purinoceptor OS=Gallus gallus GN=P2RX4 PE=3 SV=1 - [E1C650_CHICK]                                                             | 32.41  | 0.972 | 43.3 | 7.99 |
| Q5ZM36   | Eukaryotic initiation factor 4A-III OS=Gallus gallus GN=EIF4A3 PE=2 SV=1 - [IF4A3_CHICK]                                          | 204.72 | 0.972 | 46.8 | 6.73 |
| P21566   | Cofilin-2 OS=Gallus gallus GN=CFL2 PE=1 SV=2 - [COF2_CHICK]                                                                       | 528.01 | 0.972 | 18.6 | 7.88 |
| P48440   | Dolichyl-diphosphooligosaccharide--protein glycosyltransferase 48 kDa subunit OS=Gallus gallus GN=DDOST PE=1 SV=1 - [OST48_CHICK] | 103.53 | 0.972 | 45.9 | 5.58 |
| F1N9T0   | Hydroxymethylglutaryl-CoA synthase, cytoplasmic OS=Gallus gallus GN=HMGS1 PE=4 SV=1 - [F1N9T0_CHICK]                              | 60.02  | 0.972 | 57.6 | 5.74 |
| P50594   | Protein mago nashi homolog OS=Gallus gallus GN=MAGOH PE=2 SV=2 - [MGN_CHICK]                                                      | 43.15  | 0.972 | 17.1 | 6.39 |
| R4GM98   | Nucleoside diphosphate kinase (Fragment) OS=Gallus gallus GN=NME3 PE=3 SV=1 - [R4GM98_CHICK]                                      | 111.95 | 0.971 | 21.0 | 7.84 |
| Q5ZMG9   | T-complex protein 1 subunit alpha OS=Gallus gallus GN=TCP1 PE=2 SV=1 - [Q5ZMG9_CHICK]                                             | 309.02 | 0.971 | 60.4 | 5.88 |
| P14315-2 | Isoform 2 of F-actin-capping protein subunit beta isoforms 1 and 2 OS=Gallus gallus GN=CAPZB - [CAPZB_CHICK]                      | 94.16  | 0.971 | 30.6 | 6.01 |
| E1C050   | Eukaryotic translation initiation factor 3 subunit F OS=Gallus gallus GN=EIF3F PE=3 SV=1 - [E1C050_CHICK]                         | 171.45 | 0.971 | 35.2 | 5.58 |
| R4GK07   | Probable cytosolic iron-sulfur protein assembly protein CIAO1 OS=Gallus gallus GN=CIAO1 PE=3 SV=1 - [R4GK07_CHICK]                | 0.00   | 0.971 | 40.5 | 5.81 |



|        |                                                                                                                    |        |       |      |       |
|--------|--------------------------------------------------------------------------------------------------------------------|--------|-------|------|-------|
| Q5ZIR8 | Mitochondrial import inner membrane translocase subunit Tim9 OS=Gallus gallus GN=TIMM9 PE=3 SV=1<br>- [TIM9_CHICK] | 0.00   | 0.971 | 10.5 | 7.21  |
| Q6EE31 | T-complex protein 1 subunit theta OS=Gallus gallus GN=CCT8 PE=1 SV=3 - [TCPQ_CHICK]                                | 756.17 | 0.971 | 59.4 | 5.53  |
| Q5ZM32 | Dihydrolipoyl dehydrogenase OS=Gallus gallus GN=DLD PE=2 SV=1 - [Q5ZM32_CHICK]                                     | 191.41 | 0.971 | 53.9 | 7.99  |
| F1NRI3 | WD repeat-containing protein 1 OS=Gallus gallus GN=WDR1 PE=4 SV=2 - [F1NRI3_CHICK]                                 | 219.85 | 0.970 | 66.5 | 6.67  |
| F1NWL8 | LisH domain-containing protein FOPNL OS=Gallus gallus GN=FOPNL PE=4 SV=1 - [F1NWL8_CHICK]                          | 0.00   | 0.970 | 19.7 | 8.10  |
| P14093 | ATP synthase protein 8 OS=Gallus gallus GN=MT-ATP8 PE=3 SV=1 - [ATP8_CHICK]                                        | 70.68  | 0.970 | 6.4  | 10.30 |
| Q9PSX7 | Rho-related GTP-binding protein RhoC OS=Gallus gallus GN=RHOC PE=1 SV=1 - [RHOC_CHICK]                             | 0.00   | 0.970 | 22.0 | 6.58  |
| Q1T766 | Nsl1 protein OS=Gallus gallus GN=Nsl1/DC31 PE=2 SV=1 - [Q1T766_CHICK]                                              | 0.00   | 0.970 | 32.1 | 8.22  |
| R9PXN3 | Testin OS=Gallus gallus GN=TES PE=4 SV=1 - [R9PXN3_CHICK]                                                          | 148.19 | 0.970 | 47.1 | 7.49  |
| F1P376 | Protein wntless homolog OS=Gallus gallus GN=WLS PE=4 SV=1 - [F1P376_CHICK]                                         | 49.74  | 0.970 | 62.1 | 6.96  |
| F1NRQ9 | Transforming growth factor beta-3 (Fragment) OS=Gallus gallus GN=TGFB3 PE=3 SV=2 -<br>[F1NRQ9_CHICK]               | 0.00   | 0.970 | 33.8 | 7.80  |
| Q5ZLI2 | Proteasome subunit alpha type OS=Gallus gallus GN=PSMA3 PE=2 SV=1 - [Q5ZLI2_CHICK]                                 | 189.73 | 0.969 | 28.5 | 5.05  |
| P18937 | NADH-ubiquinone oxidoreductase chain 2 OS=Gallus gallus GN=MT-ND2 PE=3 SV=1 - [NU2M_CHICK]                         | 0.00   | 0.969 | 38.3 | 9.91  |

|        |                                                                                                              |        |       |       |      |
|--------|--------------------------------------------------------------------------------------------------------------|--------|-------|-------|------|
| Q90700 | Calcium modulating cyclophilin ligand CAML OS=Gallus gallus GN=CAMLG PE=2 SV=1 - [Q90700_CHICK]              | 0.00   | 0.969 | 31.9  | 8.15 |
| Q5ZHN1 | Charged multivesicular body protein 2a OS=Gallus gallus GN=CHMP2A PE=2 SV=1 - [CHM2A_CHICK]                  | 23.48  | 0.969 | 24.7  | 5.67 |
| F1NH92 | Apolipoprotein O-like OS=Gallus gallus GN=APOOL PE=4 SV=1 - [F1NH92_CHICK]                                   | 66.28  | 0.969 | 30.1  | 9.55 |
| Q5ZIP3 | Deoxyhypusine hydroxylase OS=Gallus gallus GN=DOHH PE=2 SV=1 - [DOHH_CHICK]                                  | 46.58  | 0.968 | 32.9  | 4.83 |
| Q5ZID0 | NmrA-like family domain-containing protein 1 OS=Gallus gallus GN=NMRAL1 PE=2 SV=1 - [NMRL1_CHICK]            | 232.54 | 0.968 | 32.7  | 8.05 |
| Q5ZKU5 | Ras-related protein Rab-14 OS=Gallus gallus GN=RAB14 PE=2 SV=3 - [RAB14_CHICK]                               | 56.65  | 0.968 | 23.9  | 6.21 |
| R4GKT2 | Guanine nucleotide-binding protein subunit gamma OS=Gallus gallus GN=LOC100858976 PE=3 SV=1 - [R4GKT2_CHICK] | 74.21  | 0.968 | 7.6   | 8.51 |
| Q71R46 | Midline 1 OS=Gallus gallus GN=MID1 PE=2 SV=1 - [Q71R46_CHICK]                                                | 29.77  | 0.968 | 75.4  | 6.76 |
| Q98953 | Protein S100-A6 OS=Gallus gallus GN=S100A6 PE=3 SV=1 - [S10A6_CHICK]                                         | 172.45 | 0.968 | 10.3  | 5.01 |
| F1N9A6 | E3 ubiquitin-protein ligase BRE1A OS=Gallus gallus GN=RNF20 PE=4 SV=1 - [F1N9A6_CHICK]                       | 75.33  | 0.968 | 114.7 | 5.92 |
| A5HUM1 | Transporter associated with antigen presentation 2 OS=Gallus gallus GN=TAP2 PE=2 SV=1 - [A5HUM1_CHICK]       | 0.00   | 0.968 | 75.9  | 7.30 |
| P23668 | 16 kDa beta-galactoside-binding lectin OS=Gallus gallus PE=1 SV=1 - [LEG6_CHICK]                             | 51.98  | 0.968 | 14.9  | 5.07 |

|        |                                                                                                          |        |       |       |      |
|--------|----------------------------------------------------------------------------------------------------------|--------|-------|-------|------|
| F1NMA3 | Sulfotransferase family cytosolic 1B member 1 OS=Gallus gallus GN=SULT1B1 PE=4 SV=2 -<br>[F1NMA3_CHICK]  | 0.00   | 0.967 | 34.0  | 6.67 |
| F1P0I3 | Probable ATP-dependent RNA helicase DDX10 OS=Gallus gallus GN=DDX10 PE=4 SV=1 -<br>[F1P0I3_CHICK]        | 0.00   | 0.967 | 100.1 | 8.29 |
| F1NDR9 | Putative GTP cyclohydrolase 1 type 2 OS=Gallus gallus GN=NIF3L1 PE=3 SV=2 - [F1NDR9_CHICK]               | 83.44  | 0.967 | 41.1  | 6.98 |
| P34065 | Proteasome subunit beta type-5 (Fragment) OS=Gallus gallus GN=PSMB5 PE=2 SV=2 - [PSB5_CHICK]             | 219.04 | 0.967 | 27.0  | 8.68 |
| O57389 | CNP2 OS=Gallus gallus GN=CNP PE=2 SV=1 - [O57389_CHICK]                                                  | 310.03 | 0.966 | 47.2  | 9.07 |
| Q5ZIJ2 | 28S ribosomal protein S6, mitochondrial OS=Gallus gallus GN=MRPS6 PE=2 SV=3 - [RT06_CHICK]               | 34.14  | 0.966 | 13.8  | 9.61 |
| Q5ZKV9 | Coiled-coil domain-containing protein 132 OS=Gallus gallus GN=CCDC132 PE=2 SV=1 - [CC132_CHICK]          | 0.00   | 0.966 | 109.5 | 5.77 |
| Q5ZHS3 | Nuclear nucleic acid-binding protein C1D OS=Gallus gallus GN=C1D PE=2 SV=1 - [C1D_CHICK]                 | 0.00   | 0.966 | 16.4  | 8.75 |
| P26990 | ADP-ribosylation factor 6 OS=Gallus gallus GN=ARF6 PE=2 SV=3 - [ARF6_CHICK]                              | 146.98 | 0.966 | 20.1  | 8.95 |
| Q02391 | Golgi apparatus protein 1 OS=Gallus gallus GN=GLG1 PE=1 SV=1 - [GSLG1_CHICK]                             | 127.56 | 0.965 | 129.6 | 6.86 |
| F1NA27 | Receptor-type tyrosine-protein phosphatase gamma OS=Gallus gallus GN=PTPRG PE=4 SV=2 -<br>[F1NA27_CHICK] | 0.00   | 0.965 | 140.0 | 5.48 |
| F1NBV0 | Peroxiredoxin-6 OS=Gallus gallus GN=PRDX6 PE=4 SV=1 - [F1NBV0_CHICK]                                     | 513.34 | 0.965 | 25.1  | 6.38 |

|        |                                                                                                   |         |       |       |      |
|--------|---------------------------------------------------------------------------------------------------|---------|-------|-------|------|
| F1NRM5 | Actin-related protein 2 (Fragment) OS=Gallus gallus GN=ACTR2 PE=3 SV=1 - [F1NRM5_CHICK]           | 68.12   | 0.965 | 43.0  | 6.74 |
| H9L3L1 | Condensin complex subunit 2 OS=Gallus gallus GN=777261 PE=3 SV=2 - [H9L3L1_CHICK]                 | 35.38   | 0.965 | 78.4  | 5.48 |
| P31335 | Bifunctional purine biosynthesis protein PURH OS=Gallus gallus GN=ATIC PE=1 SV=1 - [PUR9_CHICK]   | 255.69  | 0.965 | 64.4  | 8.18 |
| A3R0S3 | Growth factor receptor-bound protein 2 OS=Gallus gallus GN=GRB2 PE=2 SV=1 - [A3R0S3_CHICK]        | 39.26   | 0.965 | 25.2  | 6.15 |
| Q8JGM8 | BH3-interacting domain death agonist OS=Gallus gallus GN=BID PE=2 SV=2 - [BID_CHICK]              | 110.92  | 0.964 | 21.7  | 4.87 |
| F1NJI0 | Annexin (Fragment) OS=Gallus gallus GN=ANXA5 PE=3 SV=1 - [F1NJI0_CHICK]                           | 391.43  | 0.964 | 36.2  | 5.82 |
| F1N8H6 | Heterochromatin protein 1-binding protein 3 OS=Gallus gallus GN=HP1BP3 PE=3 SV=1 - [F1N8H6_CHICK] | 144.82  | 0.964 | 61.8  | 9.33 |
| E1C0G5 | Ubiquitin carboxyl-terminal hydrolase OS=Gallus gallus GN=USP8 PE=3 SV=2 - [E1C0G5_CHICK]         | 0.00    | 0.964 | 127.9 | 8.34 |
| F1NFR4 | Exportin-7 OS=Gallus gallus GN=XPO7 PE=4 SV=2 - [F1NFR4_CHICK]                                    | 40.84   | 0.963 | 123.8 | 6.35 |
| F1NMJ9 | Tyrosine-protein kinase OS=Gallus gallus GN=JAK1 PE=3 SV=2 - [F1NMJ9_CHICK]                       | 51.75   | 0.962 | 132.9 | 7.47 |
| F1NJM1 | tRNA (cytosine(34)-C(5))-methyltransferase OS=Gallus gallus GN=NSUN2 PE=4 SV=1 - [F1NJM1_CHICK]   | 39.36   | 0.962 | 90.5  | 6.77 |
| H9L023 | Nicalin OS=Gallus gallus GN=NCLN PE=4 SV=2 - [H9L023_CHICK]                                       | 68.30   | 0.962 | 63.0  | 6.35 |
| E1C2S1 | Talin-1 OS=Gallus gallus GN=TLN1 PE=4 SV=2 - [E1C2S1_CHICK]                                       | 1525.96 | 0.962 | 271.7 | 6.23 |

|        |                                                                                                                                 |        |       |       |      |
|--------|---------------------------------------------------------------------------------------------------------------------------------|--------|-------|-------|------|
| F1NPJ4 | Succinate dehydrogenase [ubiquinone] flavoprotein subunit, mitochondrial OS=Gallus gallus GN=SDHA<br>PE=4 SV=2 - [F1NPJ4_CHICK] | 79.53  | 0.962 | 72.9  | 7.18 |
| P41239 | Tyrosine-protein kinase CSK OS=Gallus gallus GN=CSK PE=1 SV=1 - [CSK_CHICK]                                                     | 88.21  | 0.962 | 50.7  | 7.42 |
| F1NUA2 | Actin-related protein 2/3 complex subunit 5 (Fragment) OS=Gallus gallus GN=ARPC5 PE=3 SV=2 -<br>[F1NUA2_CHICK]                  | 68.42  | 0.961 | 11.1  | 9.64 |
| F1NBA0 | Syntaxin-binding protein 1 (Fragment) OS=Gallus gallus GN=STXBP1 PE=4 SV=2 - [F1NBA0_CHICK]                                     | 20.38  | 0.961 | 67.4  | 6.60 |
| E1C2P3 | Heat shock 70 kDa protein 14 OS=Gallus gallus GN=HSPA14 PE=3 SV=1 - [HSP7E_CHICK]                                               | 88.26  | 0.960 | 54.1  | 5.30 |
| F1NB68 | Paxillin (Fragment) OS=Gallus gallus GN=PXN PE=4 SV=2 - [F1NB68_CHICK]                                                          | 33.63  | 0.960 | 60.8  | 6.71 |
| F1NSP4 | BSD domain-containing protein 1 OS=Gallus gallus GN=BSDC1 PE=4 SV=1 - [F1NSP4_CHICK]                                            | 0.00   | 0.960 | 49.4  | 4.54 |
| E1BTX8 | Caldesmon OS=Gallus gallus GN=CAD PE=3 SV=2 - [E1BTX8_CHICK]                                                                    | 17.49  | 0.960 | 200.7 | 6.30 |
| P67869 | Casein kinase II subunit beta OS=Gallus gallus GN=CSNK2B PE=2 SV=1 - [CSK2B_CHICK]                                              | 62.81  | 0.960 | 24.9  | 5.55 |
| Q805F9 | DNA damage-binding protein 1 OS=Gallus gallus GN=DDB1 PE=2 SV=1 - [DDB1_CHICK]                                                  | 119.01 | 0.960 | 126.9 | 5.26 |
| F1NT76 | Hyccin OS=Gallus gallus GN=FAM126A PE=4 SV=2 - [F1NT76_CHICK]                                                                   | 30.95  | 0.960 | 57.0  | 7.96 |
| F1P157 | Exportin-4 (Fragment) OS=Gallus gallus GN=XPO4 PE=4 SV=1 - [F1P157_CHICK]                                                       | 31.77  | 0.960 | 129.7 | 5.14 |
| F1N914 | Pyrroline-5-carboxylate reductase OS=Gallus gallus GN=PYCR2 PE=3 SV=2 - [F1N914_CHICK]                                          | 229.11 | 0.960 | 33.2  | 8.02 |

|          |                                                                                                         |        |       |      |      |
|----------|---------------------------------------------------------------------------------------------------------|--------|-------|------|------|
| F1NZP5   | Calfacilitin OS=Gallus gallus GN=TLCD1 PE=2 SV=2 - [F1NZP5_CHICK]                                       | 0.00   | 0.959 | 28.3 | 9.74 |
| Q5ZJ00   | 55 kDa erythrocyte membrane protein OS=Gallus gallus GN=MPP1 PE=2 SV=1 - [EM55_CHICK]                   | 189.19 | 0.959 | 52.5 | 7.09 |
| F1NFS3   | Putative oxidoreductase GLYR1 (Fragment) OS=Gallus gallus GN=GLYR1 PE=4 SV=2 - [F1NFS3_CHICK]           | 41.69  | 0.958 | 60.4 | 9.25 |
| F1NK29   | Na(+)/H(+) exchange regulatory cofactor NHE-RF1 OS=Gallus gallus GN=SLC9A3R1 PE=4 SV=1 - [F1NK29_CHICK] | 62.30  | 0.958 | 35.9 | 6.16 |
| Q5ZMV7   | WD repeat-containing protein 82 OS=Gallus gallus GN=WDR82 PE=2 SV=1 - [WDR82_CHICK]                     | 0.00   | 0.958 | 35.1 | 7.69 |
| F1P3J5   | Lipase (Fragment) OS=Gallus gallus GN=LIPA PE=3 SV=2 - [F1P3J5_CHICK]                                   | 57.05  | 0.958 | 45.7 | 8.81 |
| F1P3F1   | Adenosylhomocysteinase OS=Gallus gallus GN=Gga.51956 PE=3 SV=2 - [F1P3F1_CHICK]                         | 526.32 | 0.958 | 74.4 | 9.23 |
| Q5ZLR6   | Rho guanine nucleotide exchange factor 6 OS=Gallus gallus GN=ARHGEF6 PE=2 SV=1 - [ARHG6_CHICK]          | 0.00   | 0.958 | 85.9 | 6.10 |
| Q800W4   | TIA-1 OS=Gallus gallus GN=TIA1 PE=2 SV=1 - [Q800W4_CHICK]                                               | 53.78  | 0.957 | 41.3 | 7.72 |
| F1NBD7   | Cyclin-dependent kinase 1 OS=Gallus gallus GN=CDK1 PE=4 SV=1 - [F1NBD7_CHICK]                           | 28.44  | 0.957 | 34.7 | 7.97 |
| F1NNI2   | Lon protease homolog (Fragment) OS=Gallus gallus GN=LONP1 PE=3 SV=2 - [F1NNI2_CHICK]                    | 128.92 | 0.957 | 95.1 | 6.09 |
| F1NSP7   | 26S protease regulatory subunit 4 (Fragment) OS=Gallus gallus GN=PSMC1 PE=4 SV=2 - [F1NSP7_CHICK]       | 260.05 | 0.957 | 47.5 | 6.11 |
| Q5ZK92-2 | Isoform 2 of Spastin OS=Gallus gallus GN=SPAST - [SPAST_CHICK]                                          | 0.00   | 0.957 | 62.6 | 9.70 |

|          |                                                                                                                                  |        |       |       |      |
|----------|----------------------------------------------------------------------------------------------------------------------------------|--------|-------|-------|------|
| Q7T048   | Aryl-hydrocarbon receptor-interacting protein OS=Gallus gallus GN=AIP PE=2 SV=1 - [Q7T048_CHICK]                                 | 36.07  | 0.956 | 37.5  | 7.20 |
| F1NDF3   | NADH dehydrogenase [ubiquinone] 1 alpha subcomplex subunit 2 (Fragment) OS=Gallus gallus<br>GN=NDUFA2 PE=3 SV=1 - [F1NDF3_CHICK] | 39.08  | 0.956 | 11.2  | 9.91 |
| O93327-2 | Isoform 1 of Core histone macro-H2A.1 OS=Gallus gallus GN=H2AFY - [H2AY_CHICK]                                                   | 133.04 | 0.956 | 39.2  | 9.83 |
| O57476   | Hsp90 co-chaperone Cdc37 OS=Gallus gallus GN=CDC37 PE=2 SV=1 - [CDC37_CHICK]                                                     | 132.37 | 0.956 | 45.6  | 5.33 |
| E1C129   | Cytosolic Fe-S cluster assembly factor NUBP1 OS=Gallus gallus GN=NUBP1 PE=3 SV=1 -<br>[E1C129_CHICK]                             | 87.18  | 0.956 | 34.5  | 5.31 |
| F1NF62   | Coiled-coil domain-containing protein 93 OS=Gallus gallus GN=CCDC93 PE=4 SV=1 - [F1NF62_CHICK]                                   | 42.71  | 0.955 | 71.6  | 6.65 |
| F1NPX4   | Vacuolar fusion protein CCZ1 homolog OS=Gallus gallus GN=CCZ1 PE=4 SV=1 - [F1NPX4_CHICK]                                         | 0.00   | 0.955 | 55.1  | 6.30 |
| Q9PTG6   | Dynactin subunit 2 OS=Gallus gallus GN=DCTN2 PE=2 SV=1 - [DCTN2_CHICK]                                                           | 272.68 | 0.955 | 45.1  | 4.98 |
| Q5ZIA5   | Coatomer subunit beta OS=Gallus gallus GN=COPB1 PE=2 SV=1 - [COPB_CHICK]                                                         | 245.19 | 0.955 | 107.1 | 6.00 |
| P48463   | Serine/threonine-protein phosphatase 2A catalytic subunit alpha isoform OS=Gallus gallus GN=PPP2CA<br>PE=2 SV=1 - [PP2AA_CHICK]  | 47.33  | 0.955 | 35.5  | 5.43 |
| Q5ZKF6   | 7-methylguanosine phosphate-specific 5'-nucleotidase OS=Gallus gallus GN=NT5C3B PE=2 SV=1 -<br>[5NT3B_CHICK]                     | 0.00   | 0.955 | 33.1  | 5.55 |
| Q05744   | Cathepsin D OS=Gallus gallus GN=CTSD PE=1 SV=1 - [CATD_CHICK]                                                                    | 194.09 | 0.954 | 43.3  | 6.32 |

|        |                                                                                                                     |        |       |       |      |
|--------|---------------------------------------------------------------------------------------------------------------------|--------|-------|-------|------|
| Q2KN97 | Cytospin-A OS=Gallus gallus GN=SPECC1L PE=2 SV=2 - [CYTSA_CHICK]                                                    | 38.53  | 0.954 | 124.8 | 5.71 |
| E1BTE0 | Single-stranded DNA-binding protein OS=Gallus gallus GN=SSBP1 PE=3 SV=2 - [E1BTE0_CHICK]                            | 47.50  | 0.954 | 17.5  | 9.45 |
| E1C6T8 | Eukaryotic translation initiation factor 3 subunit I OS=Gallus gallus GN=EIF3I PE=3 SV=1 - [E1C6T8_CHICK]           | 76.76  | 0.954 | 36.5  | 5.64 |
| F1NEJ8 | Transmembrane protein 70, mitochondrial OS=Gallus gallus GN=TMEM70 PE=4 SV=1 - [F1NEJ8_CHICK]                       | 45.60  | 0.954 | 27.4  | 9.31 |
| P63247 | Guanine nucleotide-binding protein subunit beta-2-like 1 OS=Gallus gallus GN=GNB2L1 PE=2 SV=1 - [GBLP_CHICK]        | 44.29  | 0.954 | 35.1  | 7.69 |
| Q6DV79 | Signal transducer and activator of transcription 3 OS=Gallus gallus GN=STAT3 PE=1 SV=2 - [STAT3_CHICK]              | 49.76  | 0.954 | 88.1  | 6.30 |
| F1NAD9 | Phosphorylase OS=Gallus gallus GN=PYGL PE=3 SV=2 - [F1NAD9_CHICK]                                                   | 176.21 | 0.953 | 87.4  | 5.87 |
| F1NLH9 | Inosine triphosphate pyrophosphatase OS=Gallus gallus GN=ITPA PE=3 SV=2 - [ITPA_CHICK]                              | 59.13  | 0.953 | 22.2  | 6.05 |
| P10288 | Cadherin-2 OS=Gallus gallus GN=CDH2 PE=1 SV=1 - [CADH2_CHICK]                                                       | 73.73  | 0.953 | 100.4 | 4.78 |
| H9L047 | Acidic leucine-rich nuclear phosphoprotein 32 family member E OS=Gallus gallus GN=ANP32E PE=4 SV=2 - [H9L047_CHICK] | 61.03  | 0.953 | 28.9  | 3.88 |
| Q7T2U9 | Transcription factor CP2 OS=Gallus gallus GN=TFCP2 PE=2 SV=1 - [TFCP2_CHICK]                                        | 18.41  | 0.953 | 56.4  | 5.80 |
| Q5ZLQ6 | 14-3-3 protein beta/alpha OS=Gallus gallus GN=YWHAB PE=2 SV=1 - [1433B_CHICK]                                       | 626.23 | 0.953 | 27.9  | 4.83 |



|        |                                                                                                                             |        |       |      |      |
|--------|-----------------------------------------------------------------------------------------------------------------------------|--------|-------|------|------|
| F1P1L9 | Serine/threonine-protein kinase B-raf (Fragment) OS=Gallus gallus GN=BRAF PE=4 SV=1 - [F1P1L9_CHICK]                        | 0.00   | 0.953 | 84.9 | 8.47 |
| P67883 | 60S ribosomal protein L30 OS=Gallus gallus GN=RPL30 PE=3 SV=2 - [RL30_CHICK]                                                | 0.00   | 0.953 | 12.8 | 9.63 |
| F1NZC6 | Phosphoribosyl pyrophosphate synthase-associated protein 2 OS=Gallus gallus GN=PRPSAP2 PE=4 SV=1 - [F1NZC6_CHICK]           | 99.24  | 0.952 | 40.7 | 7.17 |
| F1NZW7 | Peptidyl-prolyl cis-trans isomerase OS=Gallus gallus GN=PPIC PE=3 SV=2 - [F1NZW7_CHICK]                                     | 132.62 | 0.952 | 24.7 | 8.75 |
| Q5ZIR1 | Endophilin-B1 OS=Gallus gallus GN=SH3GLB1 PE=2 SV=1 - [SHLB1_CHICK]                                                         | 118.53 | 0.952 | 40.8 | 6.29 |
| F1P4G0 | Methionine aminopeptidase 2 OS=Gallus gallus GN=METAP2 PE=3 SV=1 - [F1P4G0_CHICK]                                           | 0.00   | 0.952 | 53.1 | 5.81 |
| Q09121 | Eukaryotic translation initiation factor 5A-1 OS=Gallus gallus GN=EIF5A1 PE=1 SV=3 - [IF5A1_CHICK]                          | 161.15 | 0.952 | 15.9 | 5.55 |
| F1NPG2 | Isocitrate dehydrogenase [NADP] (Fragment) OS=Gallus gallus GN=IDH1 PE=3 SV=1 - [F1NPG2_CHICK]                              | 173.60 | 0.951 | 46.9 | 8.12 |
| Q5ZK62 | Arf-GAP with coiled-coil, ANK repeat and PH domain-containing protein 2 OS=Gallus gallus GN=ACAP2 PE=2 SV=1 - [ACAP2_CHICK] | 43.62  | 0.951 | 88.4 | 6.77 |
| Q5ZLL8 | Glycerol-3-phosphate acyltransferase 3 OS=Gallus gallus GN=AGPAT9 PE=2 SV=1 - [GPAT3_CHICK]                                 | 0.00   | 0.951 | 50.1 | 8.94 |
| Q45QT1 | Soluble epoxide hydrolase OS=Gallus gallus GN=EPHX2 PE=2 SV=1 - [Q45QT1_CHICK]                                              | 97.05  | 0.951 | 63.2 | 6.29 |
| E1C5T4 | 5-aminolevulinic acid synthase OS=Gallus gallus GN=ALAS1 PE=3 SV=2 - [E1C5T4_CHICK]                                         | 0.00   | 0.950 | 69.9 | 8.37 |

|        |                                                                                                                    |        |       |       |      |
|--------|--------------------------------------------------------------------------------------------------------------------|--------|-------|-------|------|
| Q5ZKG8 | Golgi to ER traffic protein 4 homolog OS=Gallus gallus GN=GET4 PE=2 SV=1 - [GET4_CHICK]                            | 61.60  | 0.950 | 34.6  | 5.55 |
| F1P3A5 | Proto-oncogene c-Rel OS=Gallus gallus GN=REL PE=4 SV=2 - [F1P3A5_CHICK]                                            | 0.00   | 0.950 | 66.9  | 6.49 |
| Q5ZJA4 | Actin-related protein 5 OS=Gallus gallus GN=ACTR5 PE=2 SV=1 - [ARP5_CHICK]                                         | 0.00   | 0.950 | 69.3  | 5.34 |
| F1NFS0 | Elongation factor 2 (Fragment) OS=Gallus gallus GN=EEF2 PE=4 SV=2 - [F1NFS0_CHICK]                                 | 560.36 | 0.950 | 95.2  | 6.83 |
| F1NMK3 | WAS protein family homolog 1 OS=Gallus gallus GN=WASH1 PE=4 SV=1 - [F1NMK3_CHICK]                                  | 121.88 | 0.950 | 51.6  | 5.52 |
| R4GL78 | Platelet-activating factor acetylhydrolase IB subunit beta OS=Gallus gallus GN=PFAFH1B2 PE=4 SV=1 - [R4GL78_CHICK] | 203.65 | 0.949 | 26.8  | 6.21 |
| F1NYK9 | Pannexin (Fragment) OS=Gallus gallus GN=PANX1 PE=3 SV=2 - [F1NYK9_CHICK]                                           | 53.31  | 0.949 | 46.7  | 6.87 |
| P87362 | Bleomycin hydrolase OS=Gallus gallus GN=BLMH PE=1 SV=1 - [BLMH_CHICK]                                              | 0.00   | 0.949 | 52.7  | 5.90 |
| P20136 | Glutathione S-transferase 2 OS=Gallus gallus GN=GSTM2 PE=1 SV=4 - [GSTM2_CHICK]                                    | 68.84  | 0.949 | 25.9  | 7.33 |
| P52162 | Protein max OS=Gallus gallus GN=MAX PE=3 SV=1 - [MAX_CHICK]                                                        | 39.72  | 0.949 | 18.2  | 6.30 |
| Q5ZL74 | Vesicle-associated membrane protein 7 OS=Gallus gallus GN=VAMP7 PE=2 SV=1 - [VAMP7_CHICK]                          | 0.00   | 0.949 | 24.7  | 8.22 |
| F1NSH8 | Adenosylhomocysteinase OS=Gallus gallus GN=AHCYL2 PE=3 SV=2 - [F1NSH8_CHICK]                                       | 98.58  | 0.949 | 56.7  | 7.99 |
| Q5F3R2 | Lysine-specific demethylase 5B OS=Gallus gallus GN=KDM5B PE=2 SV=1 - [KDM5B_CHICK]                                 | 0.00   | 0.948 | 173.3 | 6.28 |
| Q5ZMJ0 | Peptidyl-prolyl cis-trans isomerase OS=Gallus gallus GN=PPIF PE=2 SV=1 - [Q5ZMJ0_CHICK]                            | 124.42 | 0.948 | 21.7  | 8.98 |

|          |                                                                                                                               |        |       |       |      |
|----------|-------------------------------------------------------------------------------------------------------------------------------|--------|-------|-------|------|
| Q5F3Z3   | Ubiquitin-conjugating enzyme E2 variant 2 OS=Gallus gallus GN=UBE2V2 PE=2 SV=1 - [UB2V2_CHICK]                                | 62.81  | 0.948 | 16.3  | 8.09 |
| P0CG62   | Polyubiquitin-B OS=Gallus gallus GN=UBB PE=2 SV=1 - [UBB_CHICK]                                                               | 389.91 | 0.948 | 34.3  | 7.53 |
| E1C4N7   | Sorting nexin OS=Gallus gallus GN=SNX18 PE=3 SV=2 - [E1C4N7_CHICK]                                                            | 0.00   | 0.947 | 66.6  | 6.57 |
| E1BVS1   | E3 ubiquitin-protein ligase OS=Gallus gallus GN=ITCH PE=4 SV=2 - [E1BVS1_CHICK]                                               | 0.00   | 0.947 | 102.3 | 6.96 |
| E1BWJ5   | Ubiquitin carboxyl-terminal hydrolase OS=Gallus gallus GN=USP9X PE=3 SV=1 - [E1BWJ5_CHICK]                                    | 69.47  | 0.947 | 290.0 | 5.86 |
| F1N954   | Proteasome subunit alpha type (Fragment) OS=Gallus gallus GN=PSMA1 PE=3 SV=2 - [F1N954_CHICK]                                 | 165.94 | 0.947 | 29.3  | 6.54 |
| F1NH88   | Condensin complex subunit 1 OS=Gallus gallus GN=NCAPD2 PE=3 SV=2 - [F1NH88_CHICK]                                             | 0.00   | 0.947 | 157.6 | 5.74 |
| Q5ZMQ0   | Armadillo repeat-containing protein 1 OS=Gallus gallus GN=ARMC1 PE=2 SV=1 - [ARMC1_CHICK]                                     | 26.74  | 0.947 | 31.0  | 5.74 |
| Q5ZKE7   | UMP-CMP kinase OS=Gallus gallus GN=CMPK PE=2 SV=1 - [KCY_CHICK]                                                               | 103.18 | 0.946 | 22.2  | 7.21 |
| F1NB37   | tRNA (guanine(10)-N2)-methyltransferase homolog OS=Gallus gallus GN=TRMT11 PE=4 SV=1 - [F1NB37_CHICK]                         | 0.00   | 0.946 | 53.0  | 8.27 |
| O13113   | Dolichyl-diphosphooligosaccharide--protein glycosyltransferase subunit DAD1 OS=Gallus gallus GN=DAD1 PE=2 SV=1 - [DAD1_CHICK] | 113.66 | 0.946 | 12.9  | 8.53 |
| R4GFV6   | Oxysterol-binding protein (Fragment) OS=Gallus gallus GN=OSBP PE=3 SV=1 - [R4GFV6_CHICK]                                      | 56.21  | 0.946 | 78.3  | 6.93 |
| P10039-3 | Isoform 3 of Tenascin OS=Gallus gallus GN=TNC - [TENA_CHICK]                                                                  | 190.63 | 0.945 | 168.8 | 5.24 |

|        |                                                                                                        |        |       |       |      |
|--------|--------------------------------------------------------------------------------------------------------|--------|-------|-------|------|
| O57535 | Nucleoside diphosphate kinase OS=Gallus gallus PE=2 SV=1 - [NDK_CHICK]                                 | 160.95 | 0.945 | 17.3  | 7.90 |
| E1C4Q0 | Ribonucleoside-diphosphate reductase OS=Gallus gallus GN=RRM1 PE=3 SV=2 - [E1C4Q0_CHICK]               | 59.66  | 0.945 | 90.0  | 7.15 |
| Q6R2T1 | PS1D OS=Gallus gallus GN=ZCCHC17 PE=2 SV=1 - [Q6R2T1_CHICK]                                            | 0.00   | 0.945 | 26.8  | 9.48 |
| F1NH22 | Reticulon OS=Gallus gallus GN=RTN1 PE=4 SV=1 - [F1NH22_CHICK]                                          | 271.49 | 0.944 | 23.6  | 8.94 |
| P02612 | Myosin regulatory light chain 2, smooth muscle major isoform OS=Gallus gallus PE=1 SV=2 - [MLRM_CHICK] | 15.85  | 0.944 | 19.8  | 4.92 |
| R4GH17 | Axin-1 (Fragment) OS=Gallus gallus GN=AXIN1 PE=4 SV=1 - [R4GH17_CHICK]                                 | 0.00   | 0.944 | 62.1  | 8.51 |
| Q5ZLF4 | Zinc transporter 5 OS=Gallus gallus GN=SLC30A5 PE=2 SV=1 - [ZNT5_CHICK]                                | 0.00   | 0.944 | 84.7  | 7.42 |
| Q5ZKP4 | Trafficking protein particle complex subunit 2 OS=Gallus gallus GN=TRAPPC2 PE=2 SV=2 - [TPPC2_CHICK]   | 0.00   | 0.943 | 16.6  | 6.52 |
| Q9W689 | Ataxin-3 OS=Gallus gallus GN=ATXN3 PE=2 SV=1 - [ATX3_CHICK]                                            | 18.20  | 0.943 | 41.6  | 4.65 |
| E1BWG0 | Fatty acid synthase OS=Gallus gallus GN=FASN PE=4 SV=2 - [E1BWG0_CHICK]                                | 452.91 | 0.943 | 274.6 | 6.34 |
| Q5ZLQ4 | Iron-responsive element-binding protein 2 OS=Gallus gallus GN=IREB2 PE=2 SV=1 - [IREB2_CHICK]          | 0.00   | 0.942 | 105.3 | 7.62 |
| Q04929 | Adapter molecule crk OS=Gallus gallus GN=CRK PE=1 SV=1 - [CRK_CHICK]                                   | 311.60 | 0.942 | 33.8  | 5.57 |
| Q5ZIM6 | Protein AATF OS=Gallus gallus GN=AATF PE=2 SV=1 - [AATF_CHICK]                                         | 0.00   | 0.942 | 65.0  | 4.94 |

|          |                                                                                                                       |        |       |       |      |
|----------|-----------------------------------------------------------------------------------------------------------------------|--------|-------|-------|------|
| A5HUI4   | Tripartite motif protein 7 OS=Gallus gallus GN=TRIM7.2 PE=4 SV=1 - [A5HUI4_CHICK]                                     | 0.00   | 0.942 | 56.5  | 5.48 |
| E1C6D1   | Microtubule-associated protein OS=Gallus gallus GN=MAP2 PE=4 SV=2 - [E1C6D1_CHICK]                                    | 66.96  | 0.942 | 203.4 | 4.91 |
| P18359   | Dextrin OS=Gallus gallus GN=DSTN PE=1 SV=3 - [DEST_CHICK]                                                             | 611.79 | 0.942 | 18.5  | 7.59 |
| E1BS26   | Dolichyl pyrophosphate Man9GlcNAc2 alpha-1,3-glucosyltransferase OS=Gallus gallus GN=ALG6 PE=4 SV=2 - [E1BS26_CHICK]  | 0.00   | 0.942 | 57.4  | 9.01 |
| Q07498-2 | Isoform Short of Ephrin type-B receptor 3 OS=Gallus gallus GN=EPHB3 - [EPHB3_CHICK]                                   | 30.60  | 0.941 | 107.9 | 6.81 |
| F1NFY3   | Oxysterol-binding protein (Fragment) OS=Gallus gallus GN=OSBPL11 PE=3 SV=2 - [F1NFY3_CHICK]                           | 134.08 | 0.940 | 78.7  | 6.67 |
| P33150   | Cadherin-13 OS=Gallus gallus GN=CDH13 PE=1 SV=1 - [CAD13_CHICK]                                                       | 132.73 | 0.940 | 78.3  | 5.07 |
| Q5ZLN1   | Phosphoglycerate mutase 1 OS=Gallus gallus GN=PGAM1 PE=1 SV=3 - [PGAM1_CHICK]                                         | 598.26 | 0.940 | 28.9  | 7.49 |
| F1NHT3   | Spectrin alpha chain, non-erythrocytic 1 OS=Gallus gallus GN=SPTAN1 PE=4 SV=2 - [F1NHT3_CHICK]                        | 451.70 | 0.940 | 285.2 | 5.33 |
| Q5ZIP2   | Ragulator complex protein LAMTOR3 OS=Gallus gallus GN=LAMTOR3 PE=2 SV=1 - [LTOR3_CHICK]                               | 31.35  | 0.940 | 13.7  | 7.34 |
| R4GI40   | LDLR chaperone MESD OS=Gallus gallus GN=MESDC2 PE=4 SV=1 - [R4GI40_CHICK]                                             | 38.50  | 0.940 | 24.5  | 7.37 |
| F1NSY1   | Sodium/potassium-transporting ATPase subunit alpha-1 (Fragment) OS=Gallus gallus GN=ATP1A1 PE=3 SV=2 - [F1NSY1_CHICK] | 191.30 | 0.940 | 112.0 | 5.62 |
| P53033   | Replication factor C subunit 2 OS=Gallus gallus GN=RFC2 PE=2 SV=1 - [RFC2_CHICK]                                      | 55.71  | 0.940 | 39.7  | 5.95 |

|        |                                                                                                      |        |       |       |      |
|--------|------------------------------------------------------------------------------------------------------|--------|-------|-------|------|
| H9L168 | Multivesicular body subunit 12A OS=Gallus gallus GN=FAM125A PE=4 SV=1 - [H9L168_CHICK]               | 0.00   | 0.940 | 28.0  | 8.82 |
| E1BRG6 | Plasma membrane calcium-transporting ATPase 1 OS=Gallus gallus GN=ATP2B1 PE=3 SV=2 - [E1BRG6_CHICK]  | 89.11  | 0.939 | 129.2 | 6.35 |
| Q08393 | Glutathione S-transferase OS=Gallus gallus PE=2 SV=2 - [GSTA2_CHICK]                                 | 52.67  | 0.939 | 25.4  | 8.73 |
| F1NE50 | Probable glutamate--tRNA ligase, mitochondrial OS=Gallus gallus GN=EARS2 PE=3 SV=1 - [F1NE50_CHICK]  | 16.19  | 0.939 | 56.9  | 6.87 |
| F1NPD7 | Proteasomal ATPase-associated factor 1 OS=Gallus gallus GN=PAAF1 PE=4 SV=1 - [F1NPD7_CHICK]          | 38.66  | 0.939 | 42.4  | 5.77 |
| Q5ZJ03 | Guanine nucleotide-binding protein subunit gamma OS=Gallus gallus GN=GNG2 PE=3 SV=1 - [Q5ZJ03_CHICK] | 52.91  | 0.939 | 7.9   | 7.99 |
| F1NZ49 | Yorkie homolog (Fragment) OS=Gallus gallus GN=YAP1 PE=4 SV=2 - [F1NZ49_CHICK]                        | 85.67  | 0.939 | 42.2  | 5.22 |
| F1P526 | Protein phosphatase methylesterase 1 OS=Gallus gallus GN=PPME1 PE=3 SV=2 - [F1P526_CHICK]            | 0.00   | 0.938 | 42.6  | 5.85 |
| Q90635 | Dihydropyrimidinase-related protein 2 OS=Gallus gallus GN=DPYSL2 PE=2 SV=1 - [DPYL2_CHICK]           | 361.79 | 0.938 | 62.3  | 6.38 |
| F1N9U1 | Serine/threonine-protein kinase TAO3 OS=Gallus gallus GN=TAOK3 PE=4 SV=1 - [F1N9U1_CHICK]            | 0.00   | 0.937 | 105.3 | 7.62 |
| F1N9S7 | Annexin OS=Gallus gallus GN=ANXA1 PE=3 SV=1 - [F1N9S7_CHICK]                                         | 295.50 | 0.937 | 38.5  | 7.44 |
| F1NSV1 | Sulfhydryl oxidase OS=Gallus gallus GN=GFER PE=3 SV=2 - [F1NSV1_CHICK]                               | 0.00   | 0.937 | 21.4  | 6.21 |

|        |                                                                                                  |         |       |       |      |
|--------|--------------------------------------------------------------------------------------------------|---------|-------|-------|------|
| F1NKI1 | Cartilage-associated protein OS=Gallus gallus GN=CRTAP PE=4 SV=2 - [F1NKI1_CHICK]                | 0.00    | 0.936 | 46.0  | 5.16 |
| F1NZC2 | AP-3 complex subunit mu-1 OS=Gallus gallus GN=AP3M1 PE=4 SV=1 - [F1NZC2_CHICK]                   | 48.42   | 0.936 | 47.0  | 6.95 |
| Q5ZMT0 | 14-3-3 protein epsilon OS=Gallus gallus GN=YWHAE PE=1 SV=1 - [1433E_CHICK]                       | 762.30  | 0.936 | 29.2  | 4.74 |
| R4GMG8 | Cathepsin K (Fragment) OS=Gallus gallus GN=CTSK PE=3 SV=1 - [R4GMG8_CHICK]                       | 39.87   | 0.936 | 36.7  | 9.25 |
| F1N9M3 | Centromere protein Q OS=Gallus gallus GN=CENPQ PE=4 SV=1 - [F1N9M3_CHICK]                        | 0.00    | 0.936 | 32.2  | 9.17 |
| Q5ZKY2 | Ubiquitin-like modifier-activating enzyme ATG7 OS=Gallus gallus GN=ATG7 PE=2 SV=1 - [ATG7_CHICK] | 0.00    | 0.935 | 78.7  | 6.54 |
| Q9W6F3 | Ubiquitin-conjugating enzyme OS=Gallus gallus GN=UBE2A PE=2 SV=1 - [Q9W6F3_CHICK]                | 27.09   | 0.935 | 17.3  | 5.15 |
| F1N9H3 | Protein disulfide-isomerase OS=Gallus gallus GN=P4HB PE=3 SV=2 - [F1N9H3_CHICK]                  | 1418.28 | 0.934 | 55.8  | 4.88 |
| P00337 | L-lactate dehydrogenase B chain OS=Gallus gallus GN=LDHB PE=1 SV=3 - [LDHB_CHICK]                | 102.00  | 0.934 | 36.3  | 7.43 |
| F1NRN7 | Leucine-rich repeat protein SHOC-2 OS=Gallus gallus GN=SHOC2 PE=4 SV=1 - [F1NRN7_CHICK]          | 0.00    | 0.934 | 59.1  | 8.72 |
| P02467 | Collagen alpha-2(I) chain (Fragments) OS=Gallus gallus GN=COL1A2 PE=1 SV=2 - [CO1A2_CHICK]       | 78.56   | 0.934 | 129.6 | 8.94 |
| Q5F3W5 | Histone-lysine N-methyltransferase SUV39H2 OS=Gallus gallus GN=SUV39H2 PE=2 SV=1 - [SUV92_CHICK] | 0.00    | 0.934 | 46.6  | 8.27 |
| Q5ZJS8 | Galectin OS=Gallus gallus GN=LGALS8 PE=2 SV=1 - [Q5ZJS8_CHICK]                                   | 0.00    | 0.933 | 33.7  | 8.07 |
| F1NLV9 | DNA-directed RNA polymerase OS=Gallus gallus GN=Gga.56030 PE=3 SV=2 - [F1NLV9_CHICK]             | 0.00    | 0.933 | 125.6 | 7.81 |

|          |                                                                                            |        |       |       |      |
|----------|--------------------------------------------------------------------------------------------|--------|-------|-------|------|
| F1NW80   | Golgi SNAP receptor complex member 1 OS=Gallus gallus GN=GOSR1 PE=3 SV=2 - [F1NW80_CHICK]  | 34.29  | 0.933 | 28.0  | 9.45 |
| E1C8W4   | Ubiquitin carboxyl-terminal hydrolase OS=Gallus gallus GN=USP5 PE=3 SV=2 - [E1C8W4_CHICK]  | 269.32 | 0.933 | 95.7  | 5.11 |
| F1NVX3   | Alpha-(1,3)-fucosyltransferase 11 OS=Gallus gallus GN=FUT11 PE=3 SV=1 - [F1NVX3_CHICK]     | 0.00   | 0.933 | 57.5  | 7.24 |
| F1NY25   | Cytoplasmic aconitate hydratase OS=Gallus gallus GN=ACO1 PE=4 SV=1 - [F1NY25_CHICK]        | 0.00   | 0.933 | 98.0  | 7.33 |
| Q5ZME2   | Malate dehydrogenase, cytoplasmic OS=Gallus gallus GN=MDH1 PE=2 SV=1 - [MDHC_CHICK]        | 136.49 | 0.932 | 36.5  | 7.36 |
| F1NNY1   | Casein kinase I isoform alpha OS=Gallus gallus GN=CSNK1A1 PE=4 SV=1 - [F1NNY1_CHICK]       | 89.17  | 0.932 | 38.7  | 9.57 |
| Q5ZMH1   | Septin-2 OS=Gallus gallus GN=SEPT2 PE=2 SV=1 - [SEPT2_CHICK]                               | 206.76 | 0.931 | 40.2  | 6.55 |
| F1P046   | Spondin-1 OS=Gallus gallus GN=SPON1 PE=4 SV=2 - [F1P046_CHICK]                             | 0.00   | 0.931 | 90.4  | 6.60 |
| F1NE88   | Ubiquitin carboxyl-terminal hydrolase OS=Gallus gallus GN=USP4 PE=3 SV=1 - [F1NE88_CHICK]  | 42.15  | 0.931 | 107.4 | 5.83 |
| D5M8S2   | DJ-1 OS=Gallus gallus GN=DJ-1 PE=2 SV=1 - [D5M8S2_CHICK]                                   | 85.12  | 0.931 | 19.9  | 6.77 |
| F1NAX3   | Phosphoglycolate phosphatase (Fragment) OS=Gallus gallus GN=PGP PE=4 SV=2 - [F1NAX3_CHICK] | 0.00   | 0.931 | 19.8  | 4.68 |
| R4GLV0   | Coronin OS=Gallus gallus GN=LOC776194 PE=3 SV=1 - [R4GLV0_CHICK]                           | 29.63  | 0.930 | 42.8  | 6.60 |
| Q5ZJ39   | Density-regulated protein OS=Gallus gallus GN=DENR PE=2 SV=1 - [DENR_CHICK]                | 36.69  | 0.929 | 22.1  | 5.21 |
| Q91012-2 | Isoform 2 of TSC22 domain family protein 1 OS=Gallus gallus GN=TSC22D1 - [T22D1_CHICK]     | 0.00   | 0.929 | 15.3  | 5.19 |



|          |                                                                                                                       |        |       |      |      |
|----------|-----------------------------------------------------------------------------------------------------------------------|--------|-------|------|------|
| P21872-2 | Isoform Short of Trifunctional purine biosynthetic protein adenosine-3 OS=Gallus gallus GN=GART - [PUR2_CHICK]        | 35.52  | 0.929 | 46.0 | 7.87 |
| F1NTM7   | Aspartate aminotransferase OS=Gallus gallus GN=GOT1 PE=3 SV=2 - [F1NTM7_CHICK]                                        | 236.93 | 0.928 | 45.9 | 8.12 |
| F1NV24   | Syndecan (Fragment) OS=Gallus gallus GN=SDC1 PE=3 SV=1 - [F1NV24_CHICK]                                               | 0.00   | 0.927 | 33.3 | 4.70 |
| Q5ZLT7   | Basic leucine zipper and W2 domain-containing protein 1 OS=Gallus gallus GN=BZW1 PE=2 SV=1 - [BZW1_CHICK]             | 89.35  | 0.927 | 48.0 | 5.92 |
| Q5ZL13   | Nucleoside diphosphate-linked moiety X motif 19, mitochondrial OS=Gallus gallus GN=NUDT19 PE=2 SV=1 - [NUDT19_CHICK]  | 0.00   | 0.927 | 42.1 | 6.86 |
| Q5ZJA9   | Loss of heterozygosity 12 chromosomal region 1 protein homolog OS=Gallus gallus GN=LOH12CR1 PE=2 SV=1 - [L12R1_CHICK] | 0.00   | 0.927 | 20.9 | 7.44 |
| Q92074   | Beta-1,4-galactosyltransferase OS=Gallus gallus GN=CKI PE=2 SV=1 - [Q92074_CHICK]                                     | 58.05  | 0.926 | 40.9 | 8.32 |
| F1NJU7   | Tyrosine--trNA ligase, cytoplasmic OS=Gallus gallus GN=YARS PE=4 SV=2 - [F1NJU7_CHICK]                                | 98.79  | 0.926 | 59.3 | 6.65 |
| Q90W83   | Aldo-keto reductase OS=Gallus gallus GN=akr PE=2 SV=1 - [Q90W83_CHICK]                                                | 200.94 | 0.925 | 36.4 | 7.75 |
| F1NI43   | Long-chain-fatty-acid--CoA ligase ACSBG2 OS=Gallus gallus GN=ACSBG2 PE=4 SV=2 - [F1NI43_CHICK]                        | 212.43 | 0.924 | 83.9 | 7.12 |
| Q90694   | Cell division control protein 42 homolog OS=Gallus gallus GN=CDC42 PE=2 SV=1 - [CDC42_CHICK]                          | 43.47  | 0.924 | 21.3 | 6.55 |
| Q5ZI60   | Coronin OS=Gallus gallus GN=CORO1C PE=2 SV=1 - [Q5ZI60_CHICK]                                                         | 81.39  | 0.924 | 53.2 | 6.67 |

|        |                                                                                                                        |         |       |      |      |
|--------|------------------------------------------------------------------------------------------------------------------------|---------|-------|------|------|
| C6KGD4 | Progesterin and adipoQ receptor family member VII OS=Gallus gallus GN=PAQR7 PE=2 SV=1 - [C6KGD4_CHICK]                 | 39.87   | 0.924 | 39.7 | 8.37 |
| Q1G1I6 | PACSIN 3 OS=Gallus gallus GN=PACSIN3 PE=2 SV=1 - [Q1G1I6_CHICK]                                                        | 0.00    | 0.924 | 50.7 | 6.00 |
| E1BRE9 | Decorin OS=Gallus gallus GN=DCN PE=4 SV=2 - [E1BRE9_CHICK]                                                             | 28.78   | 0.923 | 39.6 | 8.32 |
| F1NZ78 | Alpha-enolase OS=Gallus gallus GN=ENO1 PE=3 SV=2 - [F1NZ78_CHICK]                                                      | 1378.88 | 0.923 | 47.3 | 6.80 |
| E1BTT8 | L-lactate dehydrogenase OS=Gallus gallus GN=LDHA PE=3 SV=2 - [E1BTT8_CHICK]                                            | 491.72  | 0.923 | 36.5 | 7.90 |
| F1NPF0 | Eukaryotic translation initiation factor 2 subunit 3 OS=Gallus gallus GN=EIF2S3 PE=4 SV=1 - [F1NPF0_CHICK]             | 148.24  | 0.923 | 51.1 | 8.27 |
| R4GM10 | Fructose-bisphosphate aldolase OS=Gallus gallus GN=ALDOC PE=3 SV=1 - [R4GM10_CHICK]                                    | 1950.09 | 0.922 | 39.3 | 6.64 |
| Q5ZLL9 | Breast cancer metastasis-suppressor 1-like protein OS=Gallus gallus GN=BRMS1L PE=2 SV=1 - [BRM1L_CHICK]                | 0.00    | 0.922 | 37.7 | 5.15 |
| P84172 | Elongation factor Tu, mitochondrial (Fragment) OS=Gallus gallus GN=TUFM PE=1 SV=1 - [EFTU_CHICK]                       | 182.04  | 0.921 | 38.2 | 8.76 |
| P00174 | Cytochrome b5 OS=Gallus gallus GN=CYB5A PE=1 SV=4 - [CYB5_CHICK]                                                       | 58.16   | 0.921 | 15.5 | 5.15 |
| F1NF77 | Vacuolar protein sorting-associated protein 53 homolog (Fragment) OS=Gallus gallus GN=VPS53 PE=4 SV=2 - [F1NF77_CHICK] | 30.86   | 0.921 | 91.8 | 7.84 |
| F1NBT4 | Ferrochelatase OS=Gallus gallus GN=FECH PE=3 SV=1 - [F1NBT4_CHICK]                                                     | 0.00    | 0.920 | 45.4 | 8.91 |

|        |                                                                                              |        |       |       |       |
|--------|----------------------------------------------------------------------------------------------|--------|-------|-------|-------|
| Q90744 | Alpha-N-acetylgalactosaminidase OS=Gallus gallus GN=NAGA PE=1 SV=1 - [NAGAB_CHICK]           | 85.32  | 0.919 | 45.6  | 6.09  |
| F1P053 | DnaJ homolog subfamily C member 3 OS=Gallus gallus GN=DNAJC3 PE=4 SV=1 - [F1P053_CHICK]      | 117.95 | 0.918 | 57.4  | 5.97  |
| P28497 | F-actin-capping protein subunit alpha-2 OS=Gallus gallus GN=CAPZA2 PE=1 SV=1 - [CAZA2_CHICK] | 44.43  | 0.917 | 32.8  | 5.82  |
| Q5ZKX6 | NEDD8-conjugating enzyme UBE2F OS=Gallus gallus GN=UBE2F PE=2 SV=1 - [UBE2F_CHICK]           | 31.13  | 0.917 | 21.2  | 6.68  |
| F1P470 | D-dopachrome decarboxylase OS=Gallus gallus GN=DDT PE=4 SV=1 - [F1P470_CHICK]                | 52.11  | 0.917 | 12.8  | 7.14  |
| F1NE60 | Sodium/hydrogen exchanger OS=Gallus gallus GN=SLC9A1 PE=3 SV=2 - [F1NE60_CHICK]              | 0.00   | 0.917 | 77.1  | 6.67  |
| F1NSX8 | Cytochrome c-type heme lyase OS=Gallus gallus GN=HCCS PE=4 SV=1 - [F1NSX8_CHICK]             | 0.00   | 0.917 | 31.4  | 6.54  |
| P14092 | ATP synthase subunit a OS=Gallus gallus GN=MT-ATP6 PE=3 SV=1 - [ATP6_CHICK]                  | 25.58  | 0.916 | 24.8  | 9.38  |
| Q5ZHQ5 | Cholinephosphotransferase 1 OS=Gallus gallus GN=CHPT1 PE=2 SV=1 - [CHPT1_CHICK]              | 28.17  | 0.915 | 37.1  | 6.67  |
| P08836 | Farnesyl pyrophosphate synthase OS=Gallus gallus GN=FDPS PE=1 SV=2 - [FPPS_CHICK]            | 323.84 | 0.915 | 42.1  | 6.57  |
| F1NCK0 | Reticulon OS=Gallus gallus GN=RTN4 PE=4 SV=1 - [F1NCK0_CHICK]                                | 79.20  | 0.914 | 22.3  | 9.19  |
| F1NB02 | 40S ribosomal protein S8 OS=Gallus gallus GN=RPS8 PE=3 SV=2 - [F1NB02_CHICK]                 | 111.99 | 0.914 | 24.2  | 10.32 |
| Q9DER7 | Tolloid-like protein 1 OS=Gallus gallus GN=TLL1 PE=2 SV=1 - [TLL1_CHICK]                     | 24.99  | 0.913 | 114.8 | 6.32  |
| F1P593 | Heat shock protein beta-1 OS=Gallus gallus GN=HSPB1 PE=3 SV=2 - [F1P593_CHICK]               | 84.93  | 0.913 | 21.8  | 6.70  |

|        |                                                                                                              |        |       |       |       |
|--------|--------------------------------------------------------------------------------------------------------------|--------|-------|-------|-------|
| F1NTK1 | Phosphoserine aminotransferase OS=Gallus gallus GN=PSAT1 PE=3 SV=2 - [F1NTK1_CHICK]                          | 94.48  | 0.913 | 40.5  | 8.63  |
| F1NGP4 | tRNA-dihydrouridine(47) synthase [NAD(P)(+)] (Fragment) OS=Gallus gallus GN=DUS3L PE=3 SV=1 - [F1NGP4_CHICK] | 0.00   | 0.912 | 71.3  | 6.98  |
| Q5ZJJ9 | Osteoclast-stimulating factor 1 OS=Gallus gallus GN=OSTF1 PE=2 SV=1 - [OSTF1_CHICK]                          | 75.79  | 0.912 | 22.3  | 8.13  |
| P05081 | Adenylate kinase isoenzyme 1 OS=Gallus gallus GN=AK1 PE=1 SV=1 - [KAD1_CHICK]                                | 102.67 | 0.912 | 21.7  | 8.59  |
| F1NJG4 | Cytochrome P450 CYP2D49 OS=Gallus gallus GN=Gga.10540 PE=2 SV=2 - [F1NJG4_CHICK]                             | 0.00   | 0.911 | 57.9  | 8.72  |
| Q5ZKZ9 | Lipase maturation factor 2 OS=Gallus gallus GN=LMF2 PE=2 SV=2 - [LMF2_CHICK]                                 | 37.69  | 0.911 | 81.5  | 9.60  |
| F1NLV8 | Inactive tyrosine-protein kinase 7 OS=Gallus gallus GN=PTK7 PE=4 SV=1 - [F1NLV8_CHICK]                       | 59.51  | 0.911 | 115.9 | 7.05  |
| Q5ZJ73 | Protein CREG1 OS=Gallus gallus GN=CREG1 PE=2 SV=1 - [CREG1_CHICK]                                            | 50.85  | 0.911 | 21.1  | 6.67  |
| Q49B65 | EF hand-containing protein 1 OS=Gallus gallus GN=EFHD1 PE=2 SV=1 - [Q49B65_CHICK]                            | 106.72 | 0.910 | 26.9  | 5.11  |
| Q5ZJ64 | Eukaryotic translation initiation factor 3 subunit M OS=Gallus gallus GN=EIF3M PE=2 SV=1 - [EIF3M_CHICK]     | 121.01 | 0.909 | 42.6  | 5.53  |
| F1NIY3 | Programmed cell death protein 4 OS=Gallus gallus GN=PDCD4 PE=4 SV=1 - [F1NIY3_CHICK]                         | 0.00   | 0.908 | 51.7  | 5.49  |
| F1P2Q5 | Fatty acid synthase OS=Gallus gallus GN=FAS PE=4 SV=2 - [F1P2Q5_CHICK]                                       | 0.00   | 0.908 | 38.4  | 6.93  |
| Q5ZL35 | Arginine and glutamate-rich protein 1 OS=Gallus gallus GN=ARGLU1 PE=2 SV=1 - [ARGL1_CHICK]                   | 28.27  | 0.908 | 33.5  | 10.32 |

|        |                                                                                                                                    |        |       |       |       |
|--------|------------------------------------------------------------------------------------------------------------------------------------|--------|-------|-------|-------|
| Q02960 | Macrophage migration inhibitory factor OS=Gallus gallus GN=MIF PE=3 SV=3 - [MIF_CHICK]                                             | 485.40 | 0.908 | 12.5  | 7.37  |
| P02457 | Collagen alpha-1(I) chain OS=Gallus gallus GN=COL1A1 PE=1 SV=3 - [CO1A1_CHICK]                                                     | 164.16 | 0.907 | 137.7 | 5.62  |
| E1C6J9 | Thy-1 membrane glycoprotein OS=Gallus gallus GN=THY1 PE=4 SV=2 - [E1C6J9_CHICK]                                                    | 174.94 | 0.907 | 18.2  | 8.02  |
| E1BZ85 | Meiosis arrest female protein 1 homolog OS=Gallus gallus GN=MARF1 PE=3 SV=1 - [MARF1_CHICK]                                        | 0.00   | 0.907 | 193.2 | 7.71  |
| Q5F428 | Eukaryotic translation initiation factor 3 subunit L OS=Gallus gallus GN=EIF3L PE=2 SV=1 - [EIF3L_CHICK]                           | 192.26 | 0.907 | 66.6  | 6.34  |
| F1NF68 | Solute carrier family 2, facilitated glucose transporter member 1 (Fragment) OS=Gallus gallus GN=SLC2A1 PE=3 SV=1 - [F1NF68_CHICK] | 15.14  | 0.907 | 53.7  | 8.21  |
| F2Z4L6 | Serum albumin OS=Gallus gallus GN=ALB PE=4 SV=2 - [F2Z4L6_CHICK]                                                                   | 0.00   | 0.906 | 64.0  | 5.45  |
| P31395 | Stathmin OS=Gallus gallus GN=STMN1 PE=1 SV=1 - [STMN1_CHICK]                                                                       | 165.81 | 0.906 | 17.1  | 6.58  |
| F1NQF4 | Heme oxygenase 1 OS=Gallus gallus GN=HMOX1 PE=4 SV=2 - [F1NQF4_CHICK]                                                              | 346.99 | 0.905 | 33.5  | 8.43  |
| F1NZY6 | CUGBP Elav-like family member 2 OS=Gallus gallus GN=CELF2 PE=4 SV=2 - [F1NZY6_CHICK]                                               | 18.54  | 0.905 | 48.6  | 8.98  |
| F2Z4M7 | 60S ribosomal protein L37a (Fragment) OS=Gallus gallus GN=RPL37A PE=3 SV=1 - [F2Z4M7_CHICK]                                        | 135.13 | 0.905 | 10.1  | 10.36 |
| F1NM13 | Ankyrin repeat and MYND domain-containing protein 2 OS=Gallus gallus GN=ANKMY2 PE=4 SV=1 - [F1NM13_CHICK]                          | 42.70  | 0.904 | 51.6  | 6.24  |

|          |                                                                                                                 |         |       |       |      |
|----------|-----------------------------------------------------------------------------------------------------------------|---------|-------|-------|------|
| O73871   | Microphthalmia-associated transcription factor isoform B OS=Gallus gallus GN=cmi9 PE=2 SV=1 -<br>[O73871_CHICK] | 0.00    | 0.904 | 52.4  | 6.67 |
| Q5ZKE5   | 45 kDa calcium-binding protein OS=Gallus gallus GN=SDF4 PE=2 SV=2 - [CAB45_CHICK]                               | 113.37  | 0.904 | 41.9  | 4.72 |
| F1NUT5   | Adenosylhomocysteinase OS=Gallus gallus GN=AHCYL1 PE=3 SV=2 - [F1NUT5_CHICK]                                    | 95.09   | 0.904 | 53.7  | 7.44 |
| O73930   | Pterin-4-alpha-carbinolamine dehydratase OS=Gallus gallus GN=PCBD1 PE=2 SV=3 - [PHS_CHICK]                      | 37.77   | 0.904 | 12.0  | 6.52 |
| P21642   | Phosphoenolpyruvate carboxykinase [GTP], mitochondrial OS=Gallus gallus GN=PCK2 PE=1 SV=2 -<br>[PCKGM_CHICK]    | 34.83   | 0.904 | 71.1  | 7.61 |
| E1BSC6   | Oxysterol-binding protein OS=Gallus gallus GN=OSBPL5 PE=3 SV=2 - [E1BSC6_CHICK]                                 | 0.00    | 0.903 | 100.7 | 8.03 |
| P00356   | Glyceraldehyde-3-phosphate dehydrogenase OS=Gallus gallus GN=GAPDH PE=2 SV=3 - [G3P_CHICK]                      | 2394.51 | 0.903 | 35.7  | 8.54 |
| R9PXN7   | Hematopoietic prostaglandin D synthase OS=Gallus gallus GN=HPGDS PE=3 SV=1 - [R9PXN7_CHICK]                     | 71.73   | 0.903 | 22.6  | 7.28 |
| Q5ZIZ0   | 6-phosphogluconate dehydrogenase, decarboxylating OS=Gallus gallus GN=PGD PE=2 SV=1 -<br>[Q5ZIZ0_CHICK]         | 390.04  | 0.903 | 53.3  | 6.98 |
| E1BS67   | Serine hydroxymethyltransferase (Fragment) OS=Gallus gallus GN=SHMT1 PE=3 SV=2 -<br>[E1BS67_CHICK]              | 84.68   | 0.903 | 58.2  | 8.57 |
| A6NAB8   | Delta-6 fatty acid desaturase OS=Gallus gallus GN=FADS2 PE=2 SV=2 - [A6NAB8_CHICK]                              | 0.00    | 0.902 | 52.0  | 8.84 |
| P28693-2 | Isoform Short of Ephrin type-B receptor 2 OS=Gallus gallus GN=EPHB2 - [EPHB2_CHICK]                             | 23.32   | 0.902 | 110.2 | 5.64 |

|          |                                                                                                    |        |       |       |       |
|----------|----------------------------------------------------------------------------------------------------|--------|-------|-------|-------|
| P07341   | Fructose-bisphosphate aldolase B OS=Gallus gallus GN=ALDOB PE=3 SV=3 - [ALDOB_CHICK]               | 70.45  | 0.902 | 39.3  | 8.59  |
| F1P1S6   | Actin-related protein 2/3 complex subunit 5 (Fragment) OS=Gallus gallus PE=3 SV=1 - [F1P1S6_CHICK] | 59.05  | 0.901 | 11.8  | 10.15 |
| F1NIJ6   | Glucose-6-phosphate isomerase OS=Gallus gallus GN=GPI PE=3 SV=1 - [F1NIJ6_CHICK]                   | 390.39 | 0.901 | 62.1  | 7.96  |
| F1ND11   | Protein arginine N-methyltransferase 7 OS=Gallus gallus GN=PRMT7 PE=4 SV=1 - [F1ND11_CHICK]        | 0.00   | 0.900 | 78.0  | 5.87  |
| F1P3A9   | Methylsterol monooxygenase 1 OS=Gallus gallus GN=SC4MOL PE=4 SV=1 - [F1P3A9_CHICK]                 | 40.99  | 0.900 | 35.5  | 7.08  |
| P07032   | Acylphosphatase-1 OS=Gallus gallus GN=ACYP1 PE=1 SV=2 - [ACYP1_CHICK]                              | 47.04  | 0.900 | 11.1  | 9.86  |
| F1P006   | Toll-interacting protein OS=Gallus gallus GN=TOLLIP PE=4 SV=1 - [F1P006_CHICK]                     | 71.62  | 0.900 | 30.6  | 5.16  |
| A4F5B6   | TAP binding protein (Precursor) OS=Gallus gallus GN=TPN PE=2 SV=1 - [A4F5B6_CHICK]                 | 34.63  | 0.899 | 45.5  | 8.65  |
| E1BXQ0   | Ubiquitin carboxyl-terminal hydrolase OS=Gallus gallus GN=USP18 PE=3 SV=1 - [E1BXQ0_CHICK]         | 41.01  | 0.899 | 43.7  | 8.10  |
| E1C1V3   | Plakoglobin OS=Gallus gallus GN=JUP PE=2 SV=2 - [E1C1V3_CHICK]                                     | 85.89  | 0.898 | 82.1  | 6.14  |
| F1NCK8   | Glycophorin C OS=Gallus gallus GN=GYPC PE=4 SV=2 - [F1NCK8_CHICK]                                  | 33.89  | 0.898 | 10.1  | 5.34  |
| E1C735   | S-adenosylmethionine synthase OS=Gallus gallus GN=MAT1A PE=3 SV=1 - [E1C735_CHICK]                 | 44.14  | 0.897 | 43.7  | 6.76  |
| Q9I8D1-2 | Isoform 2 of Unconventional myosin-VI OS=Gallus gallus GN=MYO6 - [MYO6_CHICK]                      | 33.81  | 0.897 | 144.9 | 8.60  |
| F1NVM9   | Elastin OS=Gallus gallus GN=ELN PE=4 SV=2 - [F1NVM9_CHICK]                                         | 16.91  | 0.895 | 58.6  | 10.51 |

|        |                                                                                                              |        |       |      |      |
|--------|--------------------------------------------------------------------------------------------------------------|--------|-------|------|------|
| F1P3Z0 | Protein argonaute-3 OS=Gallus gallus GN=EIF2C3 PE=3 SV=1 - [F1P3Z0_CHICK]                                    | 19.90  | 0.895 | 97.3 | 9.11 |
| P79996 | Mitogen-activated protein kinase 9 OS=Gallus gallus GN=MAPK9 PE=2 SV=1 - [MK09_CHICK]                        | 0.00   | 0.893 | 44.0 | 6.39 |
| Q5F359 | Trafficking protein particle complex subunit 5 OS=Gallus gallus GN=TRAPPC5 PE=2 SV=1 - [TPPC5_CHICK]         | 0.00   | 0.892 | 21.0 | 9.29 |
| Q90WI4 | Matrix-remodeling-associated protein 8 OS=Gallus gallus GN=MXRA8 PE=2 SV=1 - [MXRA8_CHICK]                   | 42.40  | 0.890 | 50.7 | 7.77 |
| Q5ZIU8 | Katanin p80 WD40 repeat-containing subunit B1 OS=Gallus gallus GN=KATNB1 PE=2 SV=2 - [KTNB1_CHICK]           | 0.00   | 0.890 | 72.7 | 7.59 |
| F1NW43 | Pyruvate kinase OS=Gallus gallus GN=PKM2 PE=3 SV=2 - [F1NW43_CHICK]                                          | 740.98 | 0.890 | 57.8 | 7.87 |
| Q5ZLK5 | Prolyl 4-hydroxylase subunit alpha-2 OS=Gallus gallus GN=P4HA2 PE=2 SV=1 - [P4HA2_CHICK]                     | 119.17 | 0.888 | 61.4 | 6.11 |
| F1P5J8 | N-acetylglucosamine-6-phosphate deacetylase (Fragment) OS=Gallus gallus GN=AMDHD2 PE=3 SV=1 - [F1P5J8_CHICK] | 39.78  | 0.887 | 45.6 | 6.80 |
| F1NF81 | Acyl-CoA-binding protein (Fragment) OS=Gallus gallus GN=DBI PE=4 SV=1 - [F1NF81_CHICK]                       | 510.46 | 0.887 | 9.6  | 8.31 |
| Q5ZI04 | Protein FAM49A OS=Gallus gallus GN=FAM49A PE=2 SV=1 - [FA49A_CHICK]                                          | 57.71  | 0.885 | 37.3 | 6.02 |
| Q90997 | Transferrin receptor protein 1 OS=Gallus gallus GN=TFRC PE=2 SV=2 - [TFR1_CHICK]                             | 100.91 | 0.885 | 85.6 | 5.78 |
| Q5F352 | GTPase NRas OS=Gallus gallus GN=NRAS PE=2 SV=1 - [RASN_CHICK]                                                | 50.10  | 0.885 | 21.3 | 5.06 |



|          |                                                                                                        |        |       |       |      |
|----------|--------------------------------------------------------------------------------------------------------|--------|-------|-------|------|
| P30997   | Catenin alpha-2 OS=Gallus gallus GN=CTNNA2 PE=1 SV=1 - [CTNA2_CHICK]                                   | 62.07  | 0.885 | 100.6 | 6.29 |
| F1NM17   | Integral membrane protein 2B OS=Gallus gallus GN=ITM2B PE=4 SV=1 - [F1NM17_CHICK]                      | 0.00   | 0.883 | 30.0  | 5.53 |
| A1IMF0   | Ubiquitin carboxyl-terminal hydrolase isozyme L1 OS=Gallus gallus GN=UCH-L1 PE=2 SV=1 - [A1IMF0_CHICK] | 56.63  | 0.882 | 25.1  | 6.07 |
| F1NKX4   | Protein MIS12 homolog OS=Gallus gallus GN=MIS12 PE=4 SV=1 - [F1NKX4_CHICK]                             | 0.00   | 0.882 | 24.7  | 5.73 |
| F1P3X5   | tRNA pseudouridine synthase OS=Gallus gallus GN=PUS3 PE=3 SV=2 - [F1P3X5_CHICK]                        | 0.00   | 0.881 | 52.1  | 8.25 |
| Q07816-2 | Isoform Short of Bcl-2-like protein 1 OS=Gallus gallus GN=BCL2L1 - [B2CL1_CHICK]                       | 33.09  | 0.881 | 21.5  | 5.06 |
| E1BY52   | Prolyl 4-hydroxylase subunit alpha-1 OS=Gallus gallus GN=P4HA1 PE=4 SV=2 - [E1BY52_CHICK]              | 357.68 | 0.880 | 61.5  | 5.76 |
| Q5ZK09   | Protein Hikeshi OS=Gallus gallus GN=RCJMB04_13p7 PE=2 SV=2 - [HIKES_CHICK]                             | 44.61  | 0.880 | 21.8  | 5.20 |
| P01012   | Ovalbumin OS=Gallus gallus GN=SERPINB14 PE=1 SV=2 - [OVAL_CHICK]                                       | 0.00   | 0.879 | 42.9  | 5.29 |
| Q5F3X0   | Lysocardiolipin acyltransferase 1 OS=Gallus gallus GN=LCLAT1 PE=2 SV=1 - [LCLT1_CHICK]                 | 34.88  | 0.879 | 44.4  | 8.57 |
| P35915   | Hydroxymethylglutaryl-CoA lyase, mitochondrial OS=Gallus gallus GN=HMGCL PE=1 SV=1 - [HMGCL_CHICK]     | 35.70  | 0.879 | 31.4  | 7.25 |
| R4GFT9   | Guanine nucleotide-binding protein subunit gamma OS=Gallus gallus GN=GNG12 PE=3 SV=1 - [R4GFT9_CHICK]  | 45.84  | 0.878 | 8.1   | 9.25 |

|        |                                                                                                                            |        |       |       |       |
|--------|----------------------------------------------------------------------------------------------------------------------------|--------|-------|-------|-------|
| F1N9I7 | Probable carboxypeptidase PM20D1 OS=Gallus gallus GN=PM20D1 PE=4 SV=1 - [F1N9I7_CHICK]                                     | 43.52  | 0.878 | 57.1  | 7.21  |
| F1NF23 | Oxysterol-binding protein OS=Gallus gallus GN=OSBPL6 PE=3 SV=2 - [F1NF23_CHICK]                                            | 0.00   | 0.877 | 110.8 | 7.15  |
| Q5ZHK9 | Protein LLP homolog OS=Gallus gallus GN=LLPH PE=3 SV=1 - [LLPH_CHICK]                                                      | 46.73  | 0.876 | 13.4  | 10.42 |
| P07583 | Beta-galactoside-binding lectin OS=Gallus gallus PE=1 SV=2 - [LEG4_CHICK]                                                  | 648.06 | 0.876 | 15.1  | 7.09  |
| F1NM57 | Acyl-CoA-binding domain-containing protein 5 OS=Gallus gallus GN=ACBD5 PE=3 SV=1 - [F1NM57_CHICK]                          | 36.82  | 0.876 | 54.4  | 5.20  |
| F1N8Q1 | Superoxide dismutase [Cu-Zn] OS=Gallus gallus GN=SOD1 PE=3 SV=2 - [F1N8Q1_CHICK]                                           | 257.00 | 0.875 | 15.7  | 6.60  |
| F1NEX5 | Beta-hexosaminidase OS=Gallus gallus GN=HEXA PE=3 SV=1 - [F1NEX5_CHICK]                                                    | 59.80  | 0.874 | 58.9  | 6.54  |
| R4GGI6 | Methyltransferase-like protein 14 OS=Gallus gallus GN=METTL14 PE=4 SV=1 - [R4GGI6_CHICK]                                   | 0.00   | 0.874 | 50.8  | 5.49  |
| E1BXE8 | Transporter OS=Gallus gallus GN=SLC6A11 PE=3 SV=1 - [E1BXE8_CHICK]                                                         | 0.00   | 0.873 | 69.8  | 6.43  |
| P12105 | Collagen alpha-1(III) chain (Fragments) OS=Gallus gallus GN=COL3A1 PE=2 SV=2 - [CO3A1_CHICK]                               | 74.04  | 0.872 | 121.2 | 6.70  |
| E1BUA8 | Protein BCCIP homolog (Fragment) OS=Gallus gallus GN=BCCIP PE=3 SV=2 - [E1BUA8_CHICK]                                      | 42.38  | 0.872 | 35.9  | 4.91  |
| F1NNN2 | Serine/threonine-protein phosphatase 2A 55 kDa regulatory subunit B OS=Gallus gallus GN=PPP2R2D PE=3 SV=2 - [F1NNN2_CHICK] | 0.00   | 0.872 | 52.0  | 6.49  |
| E1BR38 | Argininosuccinate synthase OS=Gallus gallus GN=ASS1 PE=3 SV=2 - [E1BR38_CHICK]                                             | 0.00   | 0.872 | 46.9  | 6.54  |

|        |                                                                                                 |        |       |       |      |
|--------|-------------------------------------------------------------------------------------------------|--------|-------|-------|------|
| E1BSP1 | Proactivator polypeptide OS=Gallus gallus GN=PSAP PE=4 SV=1 - [E1BSP1_CHICK]                    | 231.42 | 0.871 | 57.5  | 5.16 |
| P19753 | Parvalbumin, thymic OS=Gallus gallus PE=1 SV=2 - [PRVT_CHICK]                                   | 0.00   | 0.868 | 11.7  | 4.68 |
| Q5ZHM5 | Protein RER1 OS=Gallus gallus GN=RER1 PE=2 SV=1 - [RER1_CHICK]                                  | 44.96  | 0.867 | 23.0  | 9.51 |
| F1NFG8 | tRNA (guanine(37)-N1)-methyltransferase OS=Gallus gallus GN=TRMT5 PE=3 SV=2 - [F1NFG8_CHICK]    | 0.00   | 0.867 | 58.5  | 8.29 |
| F1NZC0 | Aldose 1-epimerase OS=Gallus gallus GN=GALM PE=3 SV=2 - [F1NZC0_CHICK]                          | 21.88  | 0.867 | 38.0  | 6.89 |
| Q05916 | Homeobox protein engrailed-1 OS=Gallus gallus GN=EN1 PE=3 SV=1 - [HME1_CHICK]                   | 95.24  | 0.865 | 34.5  | 9.51 |
| P05300 | Lysosome-associated membrane glycoprotein 1 OS=Gallus gallus GN=LAMP1 PE=2 SV=1 - [LAMP1_CHICK] | 129.07 | 0.865 | 44.6  | 7.02 |
| Q05423 | Fatty acid-binding protein, brain OS=Gallus gallus GN=FABP7 PE=2 SV=2 - [FABP7_CHICK]           | 286.68 | 0.863 | 14.9  | 5.91 |
| Q5ZI42 | Malignant T-cell-amplified sequence 1 OS=Gallus gallus GN=MCTS1 PE=2 SV=1 - [MCTS1_CHICK]       | 0.00   | 0.863 | 20.6  | 8.82 |
| Q90WG1 | Spindlin-Z OS=Gallus gallus GN=SPINZ PE=2 SV=1 - [SPINZ_CHICK]                                  | 41.15  | 0.862 | 29.6  | 7.02 |
| Q646T7 | FK-506 binding protein 51 OS=Gallus gallus GN=FKBP51 PE=2 SV=1 - [Q646T7_CHICK]                 | 85.27  | 0.861 | 50.4  | 6.21 |
| F1NTI1 | Coiled-coil domain-containing protein 80 OS=Gallus gallus GN=CCDC80 PE=4 SV=2 - [F1NTI1_CHICK]  | 40.63  | 0.861 | 95.9  | 9.86 |
| O93510 | Gelsolin OS=Gallus gallus GN=GSN PE=2 SV=1 - [GELS_CHICK]                                       | 415.97 | 0.859 | 85.8  | 6.32 |
| E1C4H1 | Trafficking protein particle complex subunit 11 OS=Gallus gallus GN=TRAPPC11 PE=4 SV=2 -        | 0.00   | 0.859 | 128.4 | 7.53 |

| [E1C4H1_CHICK] |                                                                                                              |        |       |       |      |
|----------------|--------------------------------------------------------------------------------------------------------------|--------|-------|-------|------|
| F1NMB9         | Heme-binding protein 1 OS=Gallus gallus GN=HEBP1 PE=4 SV=1 - [F1NMB9_CHICK]                                  | 33.21  | 0.858 | 21.1  | 6.73 |
| F1NU17         | Phosphoglycerate kinase OS=Gallus gallus GN=PGK1 PE=3 SV=1 - [F1NU17_CHICK]                                  | 919.47 | 0.857 | 44.6  | 8.12 |
| P08070         | Tubulin alpha-2 chain OS=Gallus gallus PE=2 SV=1 - [TBA2_CHICK]                                              | 223.40 | 0.854 | 49.8  | 5.01 |
| Q9YH69         | Dermo protein OS=Gallus gallus GN=cdermo-1 PE=2 SV=1 - [Q9YH69_CHICK]                                        | 56.89  | 0.854 | 18.2  | 9.47 |
| P21611         | Beta-2-microglobulin OS=Gallus gallus GN=B2M PE=1 SV=3 - [B2MG_CHICK]                                        | 46.92  | 0.852 | 13.0  | 6.28 |
| P00378         | Dihydrofolate reductase OS=Gallus gallus GN=DHFR PE=1 SV=1 - [DYR_CHICK]                                     | 36.00  | 0.852 | 21.6  | 8.07 |
| P98157-2       | Isoform 2 of Low-density lipoprotein receptor-related protein 1 OS=Gallus gallus GN=LRP1 - [LRP1_CHICK]      | 223.12 | 0.852 | 506.3 | 5.26 |
| R4GKA6         | Collagen alpha-2(VI) chain OS=Gallus gallus GN=COL6A2 PE=4 SV=1 - [R4GKA6_CHICK]                             | 181.18 | 0.850 | 102.4 | 5.48 |
| E1BXS2         | Guanine nucleotide-binding protein G(i) subunit alpha-1 OS=Gallus gallus GN=GNAI1 PE=4 SV=2 - [E1BXS2_CHICK] | 147.69 | 0.850 | 40.4  | 5.97 |
| Q90927         | Nuclear factor 1 OS=Gallus gallus GN=cNFI-A4 PE=2 SV=1 - [Q90927_CHICK]                                      | 0.00   | 0.850 | 54.6  | 8.31 |
| E1BUI0         | tRNA pseudouridine synthase (Fragment) OS=Gallus gallus GN=PUSL1 PE=3 SV=2 - [E1BUI0_CHICK]                  | 55.04  | 0.849 | 33.7  | 9.64 |
| Q90617-3       | Isoform LAMP-2C of Lysosome-associated membrane glycoprotein 2 OS=Gallus gallus GN=LAMP2 -                   | 149.29 | 0.849 | 46.4  | 6.43 |

## [LAMP2\_CHICK]

|          |                                                                                                        |        |       |       |      |
|----------|--------------------------------------------------------------------------------------------------------|--------|-------|-------|------|
| Q90733   | COUP transcription factor 2 OS=Gallus gallus GN=NR2F2 PE=2 SV=1 - [COT2_CHICK]                         | 0.00   | 0.848 | 45.4  | 8.28 |
| P12957-2 | Isoform Brain I-cad of Caldesmon OS=Gallus gallus GN=CALD1 - [CALD1_CHICK]                             | 0.00   | 0.847 | 58.8  | 8.44 |
| F1N9D8   | Cathepsin B OS=Gallus gallus GN=CTSB PE=3 SV=2 - [F1N9D8_CHICK]                                        | 133.09 | 0.847 | 37.6  | 5.86 |
| A4GTP0   | Galectin OS=Gallus gallus PE=2 SV=1 - [A4GTP0_CHICK]                                                   | 66.44  | 0.846 | 25.7  | 8.27 |
| Q08392   | Glutathione S-transferase OS=Gallus gallus PE=2 SV=1 - [GSTA1_CHICK]                                   | 108.74 | 0.846 | 25.3  | 8.88 |
| F1N965   | Frizzled-7 OS=Gallus gallus GN=FZD7 PE=4 SV=1 - [F1N965_CHICK]                                         | 0.00   | 0.842 | 62.7  | 7.99 |
| E1C3U7   | Lysyl oxidase homolog 2 OS=Gallus gallus GN=LOXL2 PE=3 SV=1 - [LOXL2_CHICK]                            | 0.00   | 0.842 | 86.9  | 6.49 |
| F1NGX1   | Integrin alpha-V OS=Gallus gallus GN=ITGAV PE=3 SV=1 - [F1NGX1_CHICK]                                  | 172.35 | 0.841 | 114.3 | 5.58 |
| E1BRJ4   | DNA-directed RNA polymerase OS=Gallus gallus GN=POLR3B PE=3 SV=1 - [E1BRJ4_CHICK]                      | 0.00   | 0.840 | 127.4 | 8.54 |
| Q8AXV1   | Endophilin-A1 OS=Gallus gallus GN=SH3GL2 PE=1 SV=1 - [SH3G2_CHICK]                                     | 65.55  | 0.839 | 39.9  | 5.47 |
| F1NMF6   | Procollagen-lysine,2-oxoglutarate 5-dioxygenase 1 OS=Gallus gallus GN=PLOD1 PE=4 SV=1 - [F1NMF6_CHICK] | 198.96 | 0.837 | 84.3  | 6.74 |
| F1P2F0   | Collagen alpha-3(VI) chain OS=Gallus gallus GN=COL6A3 PE=4 SV=1 - [F1P2F0_CHICK]                       | 642.87 | 0.836 | 339.4 | 6.68 |
| R4GFM0   | FERM, RhoGEF and pleckstrin domain-containing protein 1 OS=Gallus gallus GN=FARP1 PE=4 SV=1 -          | 0.00   | 0.835 | 119.5 | 8.15 |

[R4GFM0\_CHICK]

|        |                                                                                                                 |        |       |       |      |
|--------|-----------------------------------------------------------------------------------------------------------------|--------|-------|-------|------|
| F1N8G4 | Diphthamide biosynthesis protein 2 OS=Gallus gallus GN=DPH2 PE=4 SV=1 - [F1N8G4_CHICK]                          | 0.00   | 0.834 | 52.1  | 5.54 |
| H9L0H3 | Alpha-actinin-4 (Fragment) OS=Gallus gallus GN=ACTN4 PE=4 SV=2 - [H9L0H3_CHICK]                                 | 515.20 | 0.834 | 71.6  | 6.09 |
| Q5F4B1 | Phosphoglycolate phosphatase OS=Gallus gallus GN=PGP PE=2 SV=1 - [PGP_CHICK]                                    | 39.98  | 0.833 | 33.0  | 5.73 |
| P56673 | Pituitary homeobox 1 OS=Gallus gallus GN=PITX1 PE=2 SV=1 - [PITX1_CHICK]                                        | 20.32  | 0.833 | 34.5  | 9.11 |
| Q90611 | 72 kDa type IV collagenase OS=Gallus gallus GN=MMP2 PE=1 SV=1 - [MMP2_CHICK]                                    | 267.53 | 0.829 | 74.9  | 5.49 |
| F1NME2 | Integrin beta OS=Gallus gallus GN=ITGB5 PE=3 SV=1 - [F1NME2_CHICK]                                              | 51.04  | 0.828 | 88.4  | 6.71 |
| F1NBZ7 | Serine/threonine-protein phosphatase OS=Gallus gallus GN=PPP3CA PE=3 SV=2 - [F1NBZ7_CHICK]                      | 0.00   | 0.827 | 60.6  | 5.83 |
| P51890 | Lumican OS=Gallus gallus GN=LUM PE=1 SV=1 - [LUM_CHICK]                                                         | 44.33  | 0.826 | 38.6  | 6.52 |
| B3TZC1 | PNPLA7 OS=Gallus gallus GN=PNPLA7 PE=2 SV=1 - [B3TZC1_CHICK]                                                    | 0.00   | 0.821 | 147.6 | 7.17 |
| Q5ZLGO | Acetoacetyl-CoA synthetase OS=Gallus gallus GN=AACS PE=2 SV=1 - [AACS_CHICK]                                    | 189.47 | 0.818 | 74.3  | 6.49 |
| F1NLD4 | Inhibitor of nuclear factor kappa-B kinase subunit alpha OS=Gallus gallus GN=CHUK PE=4 SV=1 -<br>[F1NLD4_CHICK] | 0.00   | 0.817 | 86.1  | 6.32 |
| F1NFE0 | Collagen alpha-1(VI) chain OS=Gallus gallus GN=COL6A1 PE=4 SV=2 - [F1NFE0_CHICK]                                | 110.52 | 0.812 | 107.9 | 5.90 |
| F1N9N4 | Stathmin-3 OS=Gallus gallus GN=NPC2 PE=4 SV=1 - [F1N9N4_CHICK]                                                  | 34.96  | 0.808 | 16.2  | 6.51 |

|          |                                                                                                                      |         |       |       |      |
|----------|----------------------------------------------------------------------------------------------------------------------|---------|-------|-------|------|
| F1NPX5   | SH3 domain-binding glutamic acid-rich-like protein (Fragment) OS=Gallus gallus GN=SH3BGRL PE=3 SV=2 - [F1NPX5_CHICK] | 106.54  | 0.802 | 12.9  | 4.88 |
| P01038   | Cystatin OS=Gallus gallus PE=1 SV=2 - [CYT_CHICK]                                                                    | 39.09   | 0.799 | 15.3  | 7.69 |
| Q8QG94   | Suppressor of fused OS=Gallus gallus GN=SUFU PE=2 SV=1 - [Q8QG94_CHICK]                                              | 46.78   | 0.786 | 53.7  | 5.33 |
| Q90Y35-2 | Isoform 2 of Zinc finger protein 622 OS=Gallus gallus GN=ZNF622 - [ZN622_CHICK]                                      | 0.00    | 0.783 | 42.6  | 6.65 |
| F1NMZ3   | Hemoglobin subunit epsilon OS=Gallus gallus GN=HBE PE=3 SV=1 - [F1NMZ3_CHICK]                                        | 37.75   | 0.761 | 16.6  | 8.91 |
| Q5ZK77   | Biogenesis of lysosome-related organelles complex 1 subunit 5 OS=Gallus gallus GN=BLOC1S5 PE=2 SV=1 - [BL1S5_CHICK]  | 34.23   | 0.759 | 22.6  | 7.06 |
| F1P0D2   | Glutamine synthetase (Fragment) OS=Gallus gallus GN=LOC417253 PE=3 SV=2 - [F1P0D2_CHICK]                             | 0.00    | 0.758 | 44.9  | 7.02 |
| F1NJT4   | Fibronectin OS=Gallus gallus GN=FN1 PE=4 SV=2 - [F1NJT4_CHICK]                                                       | 1373.06 | 0.752 | 259.0 | 6.11 |
| Q155F6   | Tumor necrosis factor-inducible protein 6 OS=Gallus gallus GN=TNFIP6 PE=2 SV=1 - [Q155F6_CHICK]                      | 44.59   | 0.747 | 30.7  | 6.02 |
| F1NJT3   | Fibronectin OS=Gallus gallus GN=FN1 PE=4 SV=1 - [F1NJT3_CHICK]                                                       | 1373.06 | 0.727 | 273.1 | 5.64 |
| O93532   | Keratin, type II cytoskeletal cochlear OS=Gallus gallus PE=2 SV=1 - [K2CO_CHICK]                                     | 95.26   | 0.693 | 53.8  | 6.10 |

Fold change=infected/control. Fold change >1 indicates up regulation, and fold change <1 indicates down regulation.
